# Supplementary material for: Intervention to reduce sedentary behaviour and improve outcomes after stroke (Get Set Go): a study protocol for the process evaluation of a pilot cluster randomised controlled trial (RECREATE)
Source: PubMed Central journal article supplement — BMJ Open. 2023 Sep 12;13(9):e075363. doi: 10.1136/bmjopen-2023-075363 (PMC10503356; doi:10.1136/bmjopen-2023-075363), 2023-09-12
Supplement: bmjopen-2023-075363.draft_revisions.pdf [file bmjopen-2023-075363.draft_revisions.pdf]

# BMJ Open

BMJ Open is committed to open peer review. As part of this commitment we make the peer review history of every article we publish publicly available.

When an article is published we post the peer reviewers' comments and the authors' responses online. We also post the versions of the paper that were used during peer review. These are the versions that the peer review comments apply to.

The versions of the paper that follow are the versions that were submitted during the peer review process. They are not the versions of record or the final published versions. They should not be cited or distributed as the published version of this manuscript.

BMJ Open is an open access journal and the full, final, typeset and author-corrected version of record of the manuscript is available on our site with no access controls, subscription charges or pay-per-view fees (<http://bmjopen.bmj.com>).

If you have any questions on BMJ Open's open peer review process please email [info.bmjopen@bmj.com](mailto:info.bmjopen@bmj.com)

# BMJ Open

## An intervention to reduce sedentary behaviour and improve outcomes after stroke (Get Set Go): A study protocol for the process evaluation of a pilot cluster randomised controlled trial (RECREATE)

|                               |                                                                                                                                                                                                                                                                                                                                                                                                                                                                                                                                                                                                                                                                                                                                                                                                                                                                                                                                                                                                                                                                                                                                          |
|-------------------------------|------------------------------------------------------------------------------------------------------------------------------------------------------------------------------------------------------------------------------------------------------------------------------------------------------------------------------------------------------------------------------------------------------------------------------------------------------------------------------------------------------------------------------------------------------------------------------------------------------------------------------------------------------------------------------------------------------------------------------------------------------------------------------------------------------------------------------------------------------------------------------------------------------------------------------------------------------------------------------------------------------------------------------------------------------------------------------------------------------------------------------------------|
| Journal:                      | <i>BMJ Open</i>                                                                                                                                                                                                                                                                                                                                                                                                                                                                                                                                                                                                                                                                                                                                                                                                                                                                                                                                                                                                                                                                                                                          |
| Manuscript ID                 | bmjopen-2023-075363                                                                                                                                                                                                                                                                                                                                                                                                                                                                                                                                                                                                                                                                                                                                                                                                                                                                                                                                                                                                                                                                                                                      |
| Article Type:                 | Protocol                                                                                                                                                                                                                                                                                                                                                                                                                                                                                                                                                                                                                                                                                                                                                                                                                                                                                                                                                                                                                                                                                                                                 |
| Date Submitted by the Author: | 05-May-2023                                                                                                                                                                                                                                                                                                                                                                                                                                                                                                                                                                                                                                                                                                                                                                                                                                                                                                                                                                                                                                                                                                                              |
| Complete List of Authors:     | Johansson, Jessica; University of Leeds, Academic Unit of Ageing and Stroke Research<br>Shannon, Rosemary; Bradford Teaching Hospitals NHS Foundation Trust, Academic Unit of Ageing and Stroke Research<br>Mossabir , Rahena; Bradford Teaching Hospitals NHS Foundation Trust, Academic Unit for Ageing and Stroke<br>Airlie, Jennifer; Bradford Teaching Hospitals NHS Foundation Trust, Academic Unit for Ageing and Stroke Research<br>Ozer, Seline; Bradford Teaching Hospitals NHS Foundation Trust, Academic Unit of Ageing and Stroke Research<br>Moreau, Lauren; University of Leeds Clinical Trials Research Unit, CTRU<br>Farrin, Amanda; University of Leeds, Clinical Trials Research Unit<br>Mead, Gillian; The University of Edinburgh Centre for Clinical Brain Sciences<br>English, Coralie; The University of Newcastle School of Health Science<br>Fitzsimons, Claire F.; University of Edinburgh Physical Activity for Health Research Centre<br>Clarke, David; University of Leeds, Academic Unit of Ageing and Stroke Research<br>Forster, Anne; University of Leeds, Academic Unit of Ageing and Stroke Research |
| Keywords:                     | Stroke < NEUROLOGY, PUBLIC HEALTH, QUALITATIVE RESEARCH, Clinical trials < THERAPEUTICS                                                                                                                                                                                                                                                                                                                                                                                                                                                                                                                                                                                                                                                                                                                                                                                                                                                                                                                                                                                                                                                  |
|                               |                                                                                                                                                                                                                                                                                                                                                                                                                                                                                                                                                                                                                                                                                                                                                                                                                                                                                                                                                                                                                                                                                                                                          |

SCHOLARONE™  
Manuscripts

# **An intervention to reduce sedentary behaviour and improve outcomes after stroke (Get Set Go): A study protocol for the process evaluation of a pilot cluster randomised controlled trial (RECREATE)**

**AUTHORS:** Jessica Faye Johansson<sup>1</sup>, Rosie Shannon<sup>2</sup>, Rahena Mossabir<sup>2</sup>, Jennifer Airlie<sup>2</sup>, Seline Ozer<sup>2</sup>, Lauren Moreau<sup>3</sup>, Amanda Farrin<sup>3</sup>, Gillian Mead<sup>4</sup>, Coralie English<sup>5</sup>, Claire Fitzsimons<sup>6</sup>, David J. Clarke<sup>1</sup>, Anne Forster<sup>1</sup> on behalf of the RECREATE Programme Management Group

<sup>1</sup> University of Leeds, Leeds Institute of Health Sciences, Academic Unit for Ageing and Stroke Research, UK

<sup>2</sup> Bradford Institute for Health Research, Academic Unit of Ageing and Stroke Research, UK

<sup>3</sup> Clinical Trials Research Unit, Leeds Institute of Clinical Trials Research, University of Leeds, UK

<sup>4</sup> Centre for Clinical Brain Sciences, University of Edinburgh, Edinburgh, UK.

<sup>5</sup> School of Health Sciences University of Newcastle, Newcastle, Australia.

Heart and Stroke Research Program, Hunter Medical Research Institute, Newcastle, Australia.

<sup>6</sup> Physical Activity for Health Research Centre, University of Edinburgh, Edinburgh, UK

Word count : 4273

Abstract word count 300

## **ABSTRACT:**

**Introduction:** Stroke survivors spend long periods of time engaging in sedentary behaviour even when their functional recovery is good. In the RECREATE programme, an intervention aimed at reducing sedentary behaviour ('Get Set Go') will be implemented and evaluated in a pragmatic external pilot cluster randomised controlled trial (cRCT) with embedded process and economic evaluations. We report the protocol for the process evaluation which will address the following objectives: 1) Describe and clarify causal assumptions about the intervention, and its mechanisms of impact; 2) Assess implementation fidelity; 3) Explore views, perceptions and acceptability of the intervention to staff, stroke survivors and their

1 carers; 4) Establish the contextual factors that influence implementation, intervention mechanisms, and  
2 outcomes.  
3  
4

5 **Methods and analysis:** This pilot trial will be conducted in 15 UK based National Health Service (NHS)  
6 stroke services. This process evaluation study, underpinned by the Medical Research Council (MRC)  
7 guidance will be undertaken in six of the randomised services (four intervention, two control). Data  
8 collection will include: observations of staff training sessions, non- participant observations in inpatient and  
9 community settings, semi-structured interviews with staff, patients and carers, and documentary analysis of  
10 key intervention components to assess completion. Additional quantitative data relating to intervention  
11 implementation will be collected in all sites. Training observations and documentary analysis data will be  
12 summarised, with other observational and interview data analysed using Thematic Analysis. Relevant  
13 theories will be used to interpret the findings, including: the Theoretical Domains Framework, Normalisation  
14 Process Theory and the Theoretical Framework of Acceptability. Anticipated outputs include:  
15 recommendations for intervention refinements (both content and implementation); a revised implementation  
16 plan, and a refined logic model (and supporting written intervention description).  
17  
18  
19  
20  
21  
22  
23  
24  
25  
26  
27  
28  
29

30 **Ethics and dissemination:** The study was approved by Yorkshire & The Humber - Bradford Leeds  
31 Research Ethics Committee (REC reference:19/YH/0403). Findings will be disseminated via peer review  
32 publications, and national and international conference presentations.  
33  
34  
35  
36

37 **Trial registration number:** ISRCTN82280581  
38  
39  
40

## 41 **STRENGTHS AND LIMITATIONS OF THE STUDY:**

- 42 • The process evaluation is underpinned by the Medical Research Council (MRC) guidance for  
43 process evaluations and addresses all key functions outlined in the guidance including  
44 implementation, mechanisms of impact and context.  
45
- 46 • Theory based, comprehensive process evaluation involving staff, patients and family, friends and  
47 carers in intervention and control services.  
48
- 49 • The process evaluation will be conducted longitudinally, providing information about changes over  
50 time.  
51  
52  
53  
54  
55  
56  
57  
58  
59  
60

- The in-depth process evaluation will be conducted in a proportion of trial services, however the implementation team will meet regularly with services not included in the process evaluation to provide an insight into implementation activity. We will also report quantitative implementation data collected across all sites.

## INTRODUCTION

Sedentary behaviour (SB) is defined as any waking behaviour characterised by low energy expenditure ( $\leq 1.5$  Metabolic Equivalent of Task (METs)) while in a sitting, lying or reclining posture (1). In this study, we use the common approach of interpreting sedentary behaviour as sitting/lying down during waking hours without being otherwise active (2). SB is the focus of considerable clinical, policy and research interest, as the evidence supporting its detrimental effects on health and well-being increases (1, 3-6). Higher levels of moderate-vigorous physical activity (MVPA) may reduce risk associated with more daily sedentary time (5). However, achieving recommended levels of MVPA to offset potential harms of high levels of SB (i.e. >300 min/week of MVPA) is likely to be challenging (5), particularly for stroke survivors. Evidence suggests this population group are more sedentary and engage in longer unbroken bouts of sedentary behaviour than other population groups (7-9). Thus, reducing SB has been suggested as a new target for therapeutic intervention after stroke (10).

In 2016, an international group of stroke recovery and rehabilitation experts reported that inadequate theoretical intervention development may explain the lack of efficacy of many existing interventions targeting people after stroke (11). The Medical Research Council (MRC) guidelines advocate the importance of using theory and evidence in developing complex interventions (12). It has also been suggested that taking a partnership approach (e.g. co-production) can facilitate the development of feasible and context-sensitive interventions and may increase the likelihood of developing an intervention that is efficacious, due to the active involvement of all relevant stakeholders (13).

## RECREATE Programme

Our National Institute for Health and Care Research (NIHR) funded seven year research programme (RECREATE) seeks to develop and evaluate strategies for reducing SB after stroke to improve outcomes.

1 The Get Set Go intervention was developed using a structured process, guided by the Behaviour Change  
2 Wheel (BCW) which incorporates the Theoretical Domains Framework (TDF) (14) in combination with a co-  
3 production approach (15) and tested as part of a feasibility study. Get Set Go aims to decrease SB after  
4 stroke by increasing the frequency and duration of standing and moving. The intervention is a whole  
5 service intervention, commencing in the inpatient stroke unit and continuing once the stroke survivor is  
6 discharged home for at least 12 weeks. The intervention focuses on training inpatient and community staff  
7 to support and encourage stroke survivors to stand and move more in everyday stroke care (as part of  
8 routine practice). It also focuses on encouraging stroke survivors to monitor their own standing and moving  
9 more, with assistance where appropriate.

10  
11  
12  
13  
14  
15  
16  
17  
18  
19  
20 The RECREATE multicentre cluster randomised controlled trial (cRCT) aimed to evaluate the clinical and  
21 cost effectiveness of the Get Set Go intervention. NHS stroke services randomised to the intervention  
22 group will be trained to deliver the intervention, whilst those randomised to the control group will continue  
23 usual practice. All patients in the stroke services randomised to the intervention will be exposed to Get Set  
24 Go. The trial originally aimed to recruit 1,156 stroke survivors in 34 NHS stroke services; however due to  
25 issues associated with the worldwide COVID pandemic, a decision was made in agreement with the funder  
26 (NIHR) to reduce the trial in size and scope to become an external pilot trial. Accordingly, the recruitment  
27 target was revised to 300-400 participants from 15 NHS stroke services, and the objectives were amended  
28 as given a definitive evaluation of effectiveness was no longer be possible (protocol for the external pilot  
29 cRCT is reported separately). In view of this a decision was also made to reduce the number of process  
30 evaluation services from 10 to six. The primary outcome is extended activities of daily living 12 months  
31 following recruitment (Nottingham Extended Activities of Daily Living (NEADL)). Secondary outcomes  
32 include SB at 12 months, cost-effectiveness, disability, quality of life, and reduction of cardiovascular risk  
33 factors

## 50 **Process evaluation**

51  
52  
53 Complex interventions consist of multiple interacting components, and generate changes within complex  
54 systems including the interactions between individuals and teams (e.g. providers and recipients) (16). As  
55 Get Set Go includes multiple components and targets the behaviour of health professionals, stroke  
56  
57  
58  
59  
60

1 survivors, and their carers/family/friends (hereafter all referred to as carers in this paper) in inpatient and  
2 community settings, it is important to understand how the complexities of human behaviour and  
3  
4 implementation across these different contexts impacts outcomes. Process evaluations are integral to  
5  
6 understanding factors which may have contributed to the trial outcomes, and to help understand and  
7  
8 evaluate the theoretical assumptions underpinning an intervention (17).  
9

10  
11 The MRC guidance (12, 17) recommends providing a clear description of the intervention and its causal  
12  
13 assumptions and Moore et al. (17) state that the interpretation of intervention outcomes should be informed  
14  
15 by an investigation of three key functions: (1) implementation, 2) mechanisms of impact and 3) context)  
16  
17 (17). In our process evaluation, the MRC guidance ensured we developed a detailed programme theory  
18  
19 represented in a logic model and supported with a written description of how the intervention is intended to  
20  
21 work. We also aligned our objectives with the three key functions and selected appropriate methods,  
22  
23 according to examples provided by Moore et al. (13).  
24  
25  
26

27 This paper describes the protocol for the pre-planned mixed-methods process evaluation embedded in the  
28  
29 RECREATE pilot cRCT.  
30  
31

### 32 **Aims and objectives**

33  
34 The process evaluation aims to explore and understand the implementation of Get Set Go and how it is  
35  
36 experienced and understood by providers and recipients by addressing the following objectives:  
37  
38  
39

- 40 1) Describe and clarify causal assumptions about the intervention, and its mechanisms of impact
- 41
- 42 2) Describe intervention delivery and assess intervention fidelity
- 43
- 44 3) Explore views, perceptions and acceptability of the intervention to staff, stroke survivors and their  
45  
46 carers
- 47
- 48
- 49 4) Establish the contextual factors that may influence implementation, intervention mechanisms, and  
50  
51 outcomes
- 52
- 53
- 54

### 55 **METHODS AND ANALYSIS**

56  
57  
58  
59  
60

1 A mixed- methods process evaluation underpinned by the MRC guidance for process evaluations will be  
2 conducted by two researchers (JFJ and RS). This approach will combine non-participant observations of  
3 staff training sessions, non-participant observations in both inpatient and community settings; semi-  
4 structured interviews with stroke survivors, carers and staff, and documentary analysis of key intervention  
5 documents.  
6  
7  
8  
9

### 10 11 12 **Study setting**

13  
14 The RECREATE project will be conducted in UK stroke services comprising inpatient and community  
15 settings. The process evaluation will be undertaken in six services (four intervention, two control) that will  
16 be included in a staggered nature due to the nature of the trial set-up. We will seek to include services that  
17 vary according to geographical location and stroke service pathways. For example, some services will  
18 include a hyper-acute, acute and rehabilitation service in one location, whereas others will be across  
19 different locations. In terms of community service provision, some will have shorter Early Supported  
20 Discharge (ESD) services whereas others will have services that are not time limited. Data collection will  
21 begin in August 2021 and is expected to be complete in May 2023 (Figure 1).  
22  
23  
24  
25  
26  
27  
28  
29  
30  
31  
32  
33  
34  
35  
36  
37  
38  
39  
40  
41  
42  
43  
44  
45  
46  
47  
48  
49  
50  
51  
52  
53  
54  
55  
56  
57  
58  
59  
60



1  
2  
3  
4  
5  
6  
7  
8  
9  
10  
11  
12  
13  
14  
15  
16  
17  
18  
19  
20  
21  
22  
23  
24  
25  
26  
27  
28  
29  
30  
31  
32  
33  
34  
35  
36  
37  
38  
39  
40  
41  
42  
43  
44  
45  
46  
47  
48  
49  
50  
51  
52  
53  
54  
55  
56  
57  
58  
59  
60

**[Insert Figure 1: Process Evaluation Flowchart]**

For peer review only

## Theoretical approach

The MRC guidance for process evaluations (17) guided this process evaluation to facilitate a comprehensive understanding of factors that influence whether an intervention is effective or ineffective. The guidance also provides flexibility to select relevant theories. Figure 2 shows how objectives and data collection methods fit with the MRC guidance (17).

**[Insert Figure 2: Process evaluation objectives and methods mapped to the MRC guidance (Moore et al., 2015)]**

For peer review only

1 The Get Set Go intervention is designed to target the behaviours of staff, patients and carers, and will be  
2 implemented in complex settings; therefore the process evaluation focuses on individual-level behaviour  
3 change, and implementation processes. During intervention development, the TDF (Cane et al., 2012) was  
4 used whilst working through the BCW, to identify determinants of behaviour that need to be addressed with  
5 the intervention (e.g. skills, knowledge, and beliefs). Behaviour Change Techniques (BCTs) were then  
6 selected to address behaviours for the different individuals e.g. staff, patients and carers (15). The  
7 determinants are presented in the logic model as part of representing the intervention's intended  
8 mechanisms of impact; one of the key functions according to Moore et al. (17).

19 To address the other two key functions (implementation and context), an implementation plan was  
20 developed based on the findings from the feasibility study. This expands the information in the logic model  
21 to outline in detail the processes that staff would ideally engage in to implement the intervention.

22 Normalisation Process Theory (NPT) was used to formulate the implementation plan, based on four  
23 constructs: coherence, cognitive participation, collective action, and reflexive monitoring (18).

24 The theoretical framework of acceptability (19) is another important framework in this process evaluation as  
25 part of addressing objective 3. It comprises seven constructs: affective attitude, burden, ethicality,  
26 intervention coherence, opportunity costs, perceived effectiveness and self-efficacy. This framework, along  
27 with the TDF and NPT, will all be used to inform the data collection and the interpretation and analysis of  
28 findings.

### 29 **Study participants**

30 Participants (staff, patients and in some cases carers) included in the study will be recruited from  
31 intervention and control services. They will be invited to take part in observations and interviews. See  
32 Table 1 for the eligibility criteria.

**Table 1: Eligibility criteria**

|                       | <b>Inclusion criteria</b>                                                                                                                                                                                                                                                                                                                                                                                                                                                                                                                                                                                                                                                                                                                                                                                                                                                                                                                                   | <b>Exclusion criteria</b>                                                                                                                                                                                             |
|-----------------------|-------------------------------------------------------------------------------------------------------------------------------------------------------------------------------------------------------------------------------------------------------------------------------------------------------------------------------------------------------------------------------------------------------------------------------------------------------------------------------------------------------------------------------------------------------------------------------------------------------------------------------------------------------------------------------------------------------------------------------------------------------------------------------------------------------------------------------------------------------------------------------------------------------------------------------------------------------------|-----------------------------------------------------------------------------------------------------------------------------------------------------------------------------------------------------------------------|
| <b>Stroke patient</b> | <ul style="list-style-type: none"> <li>• Aged <math>\geq 16</math> years at time of stroke</li> <li>• Clinical diagnosis of new or recurrent ischaemic or haemorrhagic (excluding subarachnoid haemorrhage) stroke</li> <li>• Require manual contact of no more than one person to stand to prevent falling (continuous or intermittent light touch to assist balance or co-ordination, i.e., not to support body weight)</li> <li>• Plan to live in the community post-discharge</li> <li>• For individual focused observations (non-participant) of care and treatment or individual activity related to intervention provision: are able and willing to provide written informed consent or for whom a consultee declaration (England) is provided</li> <li>• For interviews: willing to provide consent to follow-up contact for interview, prior to the point of discharge from the stroke service and are able to provide informed consent</li> </ul> | <ul style="list-style-type: none"> <li>• Receiving palliative care</li> <li>• Due to be discharged outside the defined geographical area of the associated community service(s) participating in the trial</li> </ul> |

|              |                                                                                                                                                                                                                                                                                                                                                                                                                                                                                                                                                        |                                                                                                  |
|--------------|--------------------------------------------------------------------------------------------------------------------------------------------------------------------------------------------------------------------------------------------------------------------------------------------------------------------------------------------------------------------------------------------------------------------------------------------------------------------------------------------------------------------------------------------------------|--------------------------------------------------------------------------------------------------|
|              | <ul style="list-style-type: none"> <li>English-speaking</li> </ul>                                                                                                                                                                                                                                                                                                                                                                                                                                                                                     |                                                                                                  |
| <b>Carer</b> | <ul style="list-style-type: none"> <li>Aged <math>\geq 16</math> years</li> <li>Family member or friend regularly engaging with a stroke survivor participant (&gt;once per fortnight)</li> <li>Able to provide informed consent</li> <li>Stroke patient agrees for carer to be present in interview or observation</li> <li>English-speaking</li> </ul>                                                                                                                                                                                               | <ul style="list-style-type: none"> <li>Stroke patient does not consent to participate</li> </ul> |
| <b>Staff</b> | <ul style="list-style-type: none"> <li>A registered physiotherapist, occupational therapist, nurse, doctor; or rehabilitation/therapy assistant, Stroke Care Coordinator or other multidisciplinary team member working in a participating stroke service for a significant amount of time each week</li> <li>Are able and willing to provide written/verbal informed consent for observations of care and treatment related to the Get Set Go intervention provided as part of the stroke service (either in hospital or in the community)</li> </ul> |                                                                                                  |

We aim to recruit staff for interviews across inpatient and community settings; 10 in intervention services (including two in a managerial position), and 6 in control services (one in a managerial position). We aim to recruit five patients in each of the intervention and control services. Patients will be asked if they would like a carer to be present in the interview.

1  
2 Participants will provide either verbal or written consent (depending on the circumstances) to take part in  
3  
4 focused non-participant observations and semi-structured interviews. Participants are free to withdraw at  
5  
6 any time without affecting their treatment. Participants will be made aware that if they withdraw, data  
7  
8 collected up to that point will be included in analysis unless they request otherwise. Data will be removed  
9  
10 on request provided it is still feasible to do so depending on the stage of write up.  
11  
12  
13  
14

### 15 **Data collection methods**

16  
17 Qualitative data will contribute to understanding intervention mechanisms and their impacts, intervention  
18  
19 fidelity, perceptions of the intervention and the extent to which it is acceptable and the contextual factors  
20  
21 that may influence implementation, intervention mechanisms and outcomes. Quantitative data  
22  
23 (documentary analysis and data relating to implementation) will provide additional insights into intervention  
24  
25 fidelity. Table 2 provides an overview of all data to be collected.  
26  
27  
28  
29

### 30 **Table 2: An overview of data collection methods for the process evaluation**

31  
32  
33  
34  
35  
36  
37  
38  
39  
40  
41  
42  
43  
44  
45  
46  
47  
48  
49  
50  
51  
52  
53  
54  
55  
56  
57  
58  
59  
60

|              | Data collection                               | Setting (COVID adaptation)                              | Timing                                                               | Quantities                                                                                                                              | Aims (Objectives)                                                                                                                                  | Data collection informed by                                                                                                                                                                 | Analysis method                            |
|--------------|-----------------------------------------------|---------------------------------------------------------|----------------------------------------------------------------------|-----------------------------------------------------------------------------------------------------------------------------------------|----------------------------------------------------------------------------------------------------------------------------------------------------|---------------------------------------------------------------------------------------------------------------------------------------------------------------------------------------------|--------------------------------------------|
| Observations | Training at intervention services             | Inpatient and community (Observe via video call)        | As training is delivered                                             | Inpatient and community combined: ~1 hour each session, 2-3 sessions per service                                                        | Intervention delivery and engagement (Objectives 2, 3, 4)                                                                                          | Observational framework listing intervention components and behaviours expected if delivered with fidelity.                                                                                 | Descriptive summaries, using MRC framework |
|              | Baseline at intervention and control services | Inpatient and community (Staff telephone conversations) | Before intervention delivery                                         | <b>Inpatient:</b> ~5 visits (20 hours) including ~3 therapy sessions, per service.<br><b>Community:</b> ~3 therapy sessions per service | Understand usual practice at the service, including how staff support standing and moving (Objectives 2, 4)                                        | Researcher fieldnotes, informed by Spradley's descriptive question matrix (20)                                                                                                              | Thematic analysis                          |
|              | Time points 1, 2 & 3 at intervention services | Inpatient and community (Staff telephone conversations) | 1-2 months, 4-5 months & 8-9 months after starting trial recruitment | <b>Inpatient:</b> ~8 visits (32 hours) including ~3 therapy sessions, per service.<br><b>Community:</b> ~3 therapy sessions per service | Fidelity of intervention delivery, and influencing factors (Objectives 1, 2, 3, 4)                                                                 | Observational framework listing behaviours and intervention use expected if delivered with fidelity.<br><br>Researcher fieldnotes, informed by Spradley's descriptive question matrix (20). | Thematic analysis                          |
|              | Time points 1 & 2 at control services         | Inpatient and community (Staff telephone conversations) | 2-3 months & 6-7 months after starting trial recruitment             | <b>Inpatient:</b> ~5 visits (20 hours) including ~3 therapy sessions, per service<br><b>Community:</b> ~3 therapy sessions per          | Understand usual practice at the service, including how staff support standing and moving, and differences/similarities with intervention services | Researcher fieldnotes, informed by Spradley's descriptive question matrix (20).                                                                                                             | Thematic analysis                          |

|                            |                                                                     |                                                                      |                                                    |                                                                         |                                                                                                                                                                                                       |                                                                                                                |                       |
|----------------------------|---------------------------------------------------------------------|----------------------------------------------------------------------|----------------------------------------------------|-------------------------------------------------------------------------|-------------------------------------------------------------------------------------------------------------------------------------------------------------------------------------------------------|----------------------------------------------------------------------------------------------------------------|-----------------------|
|                            |                                                                     |                                                                      |                                                    | service                                                                 | (Objective 4)                                                                                                                                                                                         |                                                                                                                |                       |
|                            | Documentary analysis intervention services (Time points 1, 2 and 3) | Inpatient and community (In patients home if unable to attend wards) | Alongside intervention service observations        | Complete documentary analysis form observation time points 1, 2 & 3     | Capture use and delivery (adherence & compliance) of intervention components (e.g. stroke patient use of intervention components) (Objective 2)                                                       | Documentary analysis form informed by fidelity expectations                                                    | Descriptive summaries |
| Semi structured interviews | Stroke patients (and carers) at intervention services               | Patients' own home (Telephone or video call)                         | ~4-6 months after service started the intervention | Inpatient and community combined: n= 5 per service                      | Explore stroke patient and carer experiences and views of standing and moving after stroke. Explore intervention use, acceptability, impact and barriers/facilitators. (Objectives 1, 2, 3, 4)        | Topic guide informed by normalisation process theory (18) and the intervention acceptability framework (19).   | Framework analysis    |
|                            | Staff at intervention services                                      | Inpatient and community setting (Telephone or video call)            | Shortly after service stops using the intervention | Inpatient and community combined: n=10 per service (including 2 senior) | Explore views on supporting standing and moving after stroke. Explore staff views of the intervention and barriers/facilitators for embedding and sustaining the intervention (Objectives 1, 2, 3, 4) | Topic guide informed by normalisation process theory (18) and the intervention acceptability framework (19).   | Framework analysis    |
|                            | Stroke patients (and carers) at control services                    | Community (Telephone or video call)                                  | ~6 months after trial recruitment starts           | Inpatient and community combined: n=5 per service                       | Explore stroke patient and carer experiences and views of standing and moving after stroke (Objective 4).                                                                                             | Topic guide informed by , normalisation process theory (18) and the intervention acceptability framework (19). | Framework analysis    |
|                            | Staff at control                                                    | Inpatient and community                                              | ~9-12 months after                                 | Inpatient and community                                                 | Explore staff views on supporting standing and                                                                                                                                                        | Topic guide informed by normalisation process theory                                                           | Framework analysis    |



|  |          |                           |                            |                                                |                                   |                                                         |  |
|--|----------|---------------------------|----------------------------|------------------------------------------------|-----------------------------------|---------------------------------------------------------|--|
|  | services | (Telephone or video call) | starting trial recruitment | combined: n=6 per service (including 1 senior) | moving after stroke (Objective 4) | (18) and the intervention acceptability framework (19). |  |
|--|----------|---------------------------|----------------------------|------------------------------------------------|-----------------------------------|---------------------------------------------------------|--|

1  
2  
3  
4  
5  
6  
7  
8  
9  
10  
11  
12  
13  
14  
15  
16  
17  
18  
19  
20  
21  
22  
23  
24  
25  
26  
27  
28  
29  
30  
31  
32  
33  
34  
35  
36  
37  
38  
39  
40  
41  
42  
43  
44  
45  
46

For peer review only

## **Qualitative data**

### **Non-participant observations in intervention and control services – general and focused**

Training observations will only be conducted in intervention services (Table 2). These will focus on the fidelity of training delivery i.e. they will establish whether the training is being delivered by the implementation team as intended. They will also focus on engagement and interactions between the implementers and the staff receiving the training. We have developed an observational framework to assist the researchers in conducting these observations.

In both intervention and control services, baseline observations followed by a series of general and focused observations at different time points (three further time points in intervention services and two in control services) will be conducted (figure 1). General observations will be conducted in ward areas or community settings to gain an overall understanding of care provided and how staff members interact with each other and with patients in these general spaces. Researchers will introduce themselves to staff and patients to explain why they are undertaking the observations. No formal consent will be required for general observations but staff and patients will have the opportunity to object to being observed. For focused observations of 1:1 therapy sessions, researchers will obtain consent from both the staff members and stroke patients engaging in the therapy session. We intend to include stroke patients with aphasia and those who lack capacity in these focused observations where they are willing. Conversations with staff will help to identify whether patients may need the accessible information sheets and consent forms; and there is also an option for consultees to provide consent on behalf of the patient in circumstances where they lack capacity (consultee declaration).

In both intervention and control services, the baseline observations will be conducted to establish a baseline understanding of the organisations and how stroke care is provided. Observations at two further time points at control services will have a similar focus to the initial baseline observations with some additional exploration of staff and patients' views on standing and moving after stroke. In intervention services, the observations at the three time points after baseline will be undertaken to explore the fidelity of intervention delivery and the factors that influence this, including: contextual factors, competence of staff

1 delivering the intervention; and the engagement of staff, stroke survivors and carers with the intervention  
2 materials.  
3  
4  
5

6 During general observations, researchers will look for evidence of the intervention being used/ adopted in  
7 inpatient and community environments. It will be an opportunity to identify changes to daily practice (from  
8 baseline) and whether there is evidence that the intervention is integrated into conversations and impacting  
9 on behavioural changes during day to day care. The focused observations will provide an opportunity to  
10 see if there are any specific changes to therapy and whether intervention language is used. In both cases  
11 researchers would expect to see staff using or talking through intervention materials. If there are  
12 circumstances where this is not the case it would be an opportunity for the researchers to understand what  
13 factors are impacting upon implementation in the context of daily practice.  
14  
15  
16  
17  
18  
19  
20  
21  
22  
23  
24

25 In all cases, the researchers will write detailed notes during their observations and use Spradley's  
26 descriptive question matrix (20) as a guide for what to document. Researchers will interact with staff in  
27 instances where it feels appropriate to clarify what they have observed. However, they will not seek to get  
28 involved in conversations that interfere with the care being provided. Contextual features relevant to the  
29 stroke services, including relationships with social care, voluntary, or community agencies will also be  
30 considered.  
31  
32  
33  
34  
35  
36  
37  
38  
39

#### 40 **Semi- structured interviews**

41  
42 Semi-structured interviews will be undertaken with a sample of staff, stroke survivors and their carers from  
43 the participating services (Table 2). Broadly, these interviews will be conducted in addition to the  
44 observations to provide further insights into different perceptions of the intervention, its acceptability and  
45 the factors that influence whether it can be implemented. Table 1 outlines the inclusion and exclusion  
46 criteria for all participants.  
47  
48  
49  
50  
51  
52  
53

#### 54 **Stroke survivor (and carers where appropriate)**

1 A proportion of participants will be invited to take part in a semi-structured interview if they have already  
2 consented to the trial and / or completed a 'consent to contact form' which indicates they are willing to be  
3 approached about participating in an interview. At the time of signing the initial consent for the trial it will be  
4 made clear that not all participants will be contacted regarding an interview and separate consent would be  
5 obtained if participants take part in interviews. Their details will be held securely at the CTRU and will be  
6 provided to the process evaluation researchers via a Secure File Transfer system.  
7  
8  
9  
10  
11  
12

13  
14 The interviews will take place approximately four - six months after commencement of the Get Set Go  
15 intervention for each stroke patient, with some flexibility. Sampling for the participants across the services  
16 (intervention n = 20 across 4 services, control n = 10 across 2 services) will consider severity of stroke,  
17 gender, communication difficulties, occupational status and living arrangements (alone/with a carer).  
18  
19  
20  
21

22 Following initial contact via phone, email or post, interested participants will be provided with an information  
23 sheet via post or email. Once they have had sufficient time to consider whether they would like to take part  
24 in an interview, potential participants will have the opportunity to ask any questions and if they are happy,  
25 an interview will be arranged. Stroke patients can express if they would like a carer to be present.  
26  
27  
28  
29

30 Interviews will take place in the participants own home or via telephone/ video call if appropriate. Consent  
31 from stroke patients and where relevant, their carer will be sought prior to interview (process evaluation  
32 consent is separate from trial consent). Table 2 provides an overview of the focus of these interviews.  
33  
34  
35  
36

37 During interviews, stroke patients will be asked to share intervention materials they received, to facilitate  
38 the documentary analysis.  
39  
40  
41

42 We have also gained ethical approval to approach participants who have not consented to the trial and ask  
43 if they would like to take part in an interview. This increases our interviewee pool where needed and  
44 provides opportunity for participants to share their experiences of the intervention and the extent to which  
45 they think it is acceptable. To facilitate this, the individuals will be approached by a process evaluation  
46 researcher and provided with an information sheet and a 'consent to contact' form. Their carer (if available)  
47 will also be approached for consent to contact. They will subsequently be approached by the researcher to  
48 arrange consent and interview. All data will be held at Academic Unit of Ageing and Stroke Research  
49 (AUASR).  
50  
51  
52  
53  
54  
55  
56  
57  
58  
59  
60

## Staff

A sample of staff from across the services (intervention n = 40 across 4 services, control n = 12 across 2 services) will be approached face to face at their work-place providing there are no COVID-19 restrictions in place. If COVID-19 restrictions interfere with recruitment, the researcher will liaise with a key member of staff to identify which staff may be interested in taking part in an interview. The aim is to interview a range of staff from across inpatient and community settings in different disciplines and levels of seniority. Following the initial approach, similar procedures to those outlined above for stroke survivors will be undertaken to ensure that staff are provided with an information sheet and given time to consider participation and ask questions. Staff interviews will take place as the intervention ceases at each service (approximately 9 months into intervention delivery). Table 2 outlines the focus of the interviews and how they differ between the intervention and control services. Fully informed consent will be obtained prior to the interview which will take place in a location of staffs' choosing or via telephone/video call.

### Data collection materials:

Documents have been created and will be used to facilitate the data collection process during the observations (Table 2). These include observational frameworks, topic guides and a documentary analysis form. The researchers will also use the existing descriptive question matrix (20) to guide the focus of observations.

### Training observation framework

The training observation framework was created to capture fidelity, competence and engagement in relation to training sessions delivered by the implementation team to intervention services. The framework will be used to guide the observations and score them (scale 1-5): whether the content for each slide was delivered as intended (fidelity), how well content was delivered (competence), and how engaged the facilitators and participants were during the session. Researchers will also take notes on environmental factors that might be influential, the extent to which there is staff buy-in to the intervention and any additional reflections or aspects to follow up.

## **Fidelity framework (aligned with the logic model)**

We have created fidelity frameworks (one for inpatient, one for community settings) to be completed during observations in the inpatient and community setting. These list all intervention components and expected behaviour if the intervention is implemented with fidelity. As with the training framework, it captures competence and engagement. The competencies are aligned with TDF Framework components, included in the logic model.

## **Implementation framework**

In addition to the frameworks, we will collect detailed information about the implementation of the intervention at each of the intervention services included in the process evaluation using the implementation plan described in the earlier theoretical approach section. We will write notes in each section of the plan and indicate what has been implemented as planned, and any additional unexpected implementation strategies. We will also highlight which constructs of NPT are being addressed and note cases where they are not being addressed as planned. This process will enhance our understandings of the implementation processes needed to successfully implement the intervention.

## **Topic guides**

Topic guides for each of the different interviews (see table 2) were developed based on feasibility study findings, and have also been informed by NPT (18), the theoretical framework of acceptability (19), and the TDF (14). In line with NPT, questions focus on how staff make sense of the intervention (coherence); how they work together to build a community of practice which facilitates implementation (cognitive participation); the operational practices involved in enacting the practices (collective action) and the appraisal work to understand ways that the new practices affect those around them (reflexive monitoring). Questions to address acceptability have been included to address the seven constructs within the framework by Sekhon et al. (19). Questions focused on the TDF domains in the logic model have also been included to understand more about for example skills, knowledge, beliefs around reducing SB from the perspectives of staff, patients and where relevant their families, friends, carers.

1  
2 Interviews will be adapted to be inclusive of stroke patients, for instance by using accessible information  
3 sheets, adapting the topic guide / using appropriate images and writing down key words for people with  
4 aphasia. Interviews will be audio recorded and a summary of contextual factors written by the interviewer.  
5  
6  
7  
8  
9

## 10 Quantitative data

### 11 **Documentary analysis form**

12  
13  
14  
15  
16  
17  
18 A documentary analysis form will be used during observations and interviews, conducted on patient-held  
19 intervention components and staff-completed records. This form will document how many documents have  
20 been checked, how many are complete up to date, and the week in which completion stopped (if  
21 incomplete). These capture the recording of delivery of intervention components and provide evidence of  
22 fidelity.  
23  
24  
25  
26  
27  
28  
29

### 30 **Data analysis**

31  
32 All data collected will be analysed to address the relevant objectives (Table 2). Training observations will be  
33 summarised with a focus on fidelity, acceptability and engagement and contextual factors that may have  
34 influenced how the training was delivered or received. Relevant headings based on the MRC framework  
35 (e.g. fidelity, contextual factors) will be used to organise the data.  
36  
37  
38  
39  
40

41 Both observational and interview data will be subject to thematic analysis (21). Data will be analysed by a  
42 minimum of two researchers (JFJ and RS). Observational data will be coded into a thematic framework,  
43 and then related codes will be grouped together under thematic headings which convincingly capture and  
44 explain the relationship between coded elements of text. The interviews will be transcribed verbatim and  
45 anonymised. Data will be entered into NVivo 12 software (QSR International, 2018). Interview data will  
46 separately be analysed using a thematic approach (21). To produce the thematic frameworks, a proportion  
47 of the data will be coded independently (JFJ and RS) and key themes and subthemes will be identified to  
48 form the frameworks. The same theories used to inform the topic guides (NPT (18) and the theoretical  
49 framework of acceptability (19)) will be used to inform the thematic frameworks and themes that are  
50  
51  
52  
53  
54  
55  
56  
57  
58  
59  
60

1 produced during the analysis of the observations and interviews. The logic model, including the domains  
2 outlined in the TDF will also be considered when developing the frameworks and throughout the analysis  
3 process.  
4  
5

6  
7 The training summaries, fidelity frameworks that will be completed during observations, and the  
8 implementation plan that will be populated based on meetings with the implementation team, and  
9 observational and interview data will be used to support the interpretation of findings and will allow for  
10 comparisons to be made between services with regards to implementation fidelity, competency and  
11 engagement. Data from documentary analysis will be anonymised and summarised descriptively and will  
12 similarly be used to aid the interpretation of findings.  
13  
14  
15  
16  
17  
18  
19  
20  
21

22 Standard approaches to demonstrating trustworthiness and quality in qualitative research will be used,  
23 including: the clear documentation of the research process (methods, analysis and any problems  
24 encountered and solutions found); transparency of the development of the observational framework and  
25 interview topic guides in-light of on-going analysis; documentation of the contextual features in which the  
26 research was carried out; discussions of emerging findings among the research team; and researchers will  
27 keep a reflexive diary (22).  
28  
29  
30  
31  
32  
33  
34  
35  
36

37 The anticipated outputs of this evaluation include: recommendations for intervention refinements (both  
38 content and implementation); a revised implementation plan, and a refined logic model (and supporting  
39 written intervention description).  
40  
41  
42  
43  
44

## 45 **ETHICAL APPROVAL AND DISSEMINATION**

46  
47 The study has National Health Service (NHS) permission and was approved by Yorkshire & The Humber -  
48 Bradford Leeds Research Ethics Committee (REC reference: 19/YH/0403). In light of the COVID pandemic,  
49 an ethical amendment approved remote data collection where needed e.g., observations of staff training  
50 and audio recorded interviews via zoom. Findings will be disseminated via peer review publications, and  
51 national and international conference presentations.  
52  
53  
54  
55  
56  
57  
58  
59  
60



## DISCUSSION

1  
2  
3 Process evaluations are considered an essential part of designing and testing complex interventions (17).  
4  
5 They allow us to understand in detail the myriad of complex factors, and complex processes that contribute  
6  
7 to whether an intervention has an impact on outcomes. We intend to add to knowledge about: intervention  
8  
9 theory and how interventions contribute to change; how interventions interact with their context, wider  
10  
11 system dynamics and impacts on implementation; and how individuals experience interventions (patients,  
12  
13 staff, and carers. We also anticipate that the findings will be informative and transferable to other similar  
14  
15 research focused on evaluating complex interventions in complex settings.  
16  
17  
18  
19  
20  
21

**AUTHORS' CONTRIBUTIONS:** AF is lead grant holder and Chief Investigator, and will oversee the  
22  
23 design and implementation of the trial. JFJ leads the embedded process evaluation and is responsible for  
24  
25 planning, undertaking the research and reporting findings alongside RS. SO and LM, assisted by JA, are  
26  
27 responsible for managing the delivery of the trial. JA also leads on the ActivPAL and is responsible for the  
28  
29 implementation of the intervention alongside SO and AF. RM contributed to the planning of this process  
30  
31 evaluation. AFa, GM, CE, CF and DJC are co-investigators who were all involved in the design of the trial  
32  
33 and process evaluation, and attend regular programme meetings where advice is provided where needed.  
34  
35 All co-investigators and researchers contributed to the development of the protocol. JFJ drafted the  
36  
37 manuscript which is written on behalf of the RECREATE Programme Management Group. All authors read  
38  
39 and approved the final manuscript.  
40  
41  
42  
43  
44

## ACKNOWLEDGEMENTS:

45  
46 We would like to acknowledge the expert support of the RECREATE Programme Management Group who  
47  
48 meet regularly. The group is comprised of: Jennifer Airlie, Karen Birch, Gillian Carter, Bethan Copsey,  
49  
50 Florence Day, Coralie English, Amanda Farrin, Claire Fitzsimons, Anne Forster, Jessica Faye Johansson,  
51  
52 Rebecca Lawton, Laura Marsden, Gillian Mead, Lauren Moreau, Seline Ozer, Anita Patel, Rosie Shannon,  
53  
54 and Nahel Yaziji.  
55  
56  
57  
58  
59  
60

**FUNDING STATEMENT:** This work was supported by the National Institute for Health and Care Research (NIHR) under its Programme Grants for Applied Research Programme, grant number RP-PG-0615-20019). The views expressed are those of the author(s) and not necessarily those of the NIHR or the Department of Health and Social Care. The Funder has had no role in trial design, beyond setting the research question the trial addresses. Data collection, management, analysis and interpretation will remain independent of the Funder.

**SPONSOR:** The trial sponsor is Bradford Teaching Hospitals NHS Foundation Trust, Research Management & Support Office, Bradford Institute for Health Research, Bradford, BD9 6RJ, United Kingdom. Tel: +44 (0)1274 38 2575; e-mail: [jane.dennison@bthft.nhs.uk](mailto:jane.dennison@bthft.nhs.uk). The Sponsor will maintain oversight of trial processes, but is not involved in trial design or delivery processes. The Sponsor will not participate in data analysis or trial reporting processes.

**Data sharing statement:** The data generated from this process evaluation will be maintained by the Academic Unit of Ageing and Stroke Research. Any requests for data should be sent to corresponding author Dr Johansson and would be subject to review with the CI Professor Forster. All data-sharing activities would require a data-sharing agreement.

#### **COMPETING INTERESTS STATEMENT:**

AF, AFa, CE, CF, GM and DJC are coinvestigators on the grant funding this work therefore are partially supported by the National Institute for Health and Social Care Research (NIHR) (grant number RP-PG-0615-20019).

AF has received additional research grant support from NIHR through the following funding streams: Senior Investigator award, Health Technology Assessment (HTA) and Health and Social Care Delivery Research (HS&DR). AF has previously received support from the Stroke Association to attend the UK stroke forum and received payment from the National Institute for Health (USA) for panel membership (2021, 2022). AF is currently the chair / a member of programme steering committees for NIHR research programmes (Grant

reference numbers: NIHR 202339, NIHR 202020) and has served on the following panels: NIHR Doctoral Fellowships, NIHR senior investigators committee (2019/20), NIHR HS&DR committee (2016-2018) and Stroke Association Funding.

CE has received grant funding from the Netherlands Organisation for Scientific Research (NOW) Taskforce for Applied Research (SIA RAAK) for work in a similar area (i.e. sitting less and moving more after stroke) and is a Non-executive Director representing interests of Research and Chair of Research Advisory Committee for the Stroke Foundation of Australia (unpaid).

CF is a coinvestigator / collaborator on other grants on the topic of sedentary behaviour / physical activity and is therefore partially supported by grant funding received from the University of Edinburgh and the Irish Health Board. CE has previously been supported to conduct work in a similar area by grant funding received from the Chief Scientist Office of the Scottish Government, Medical Research Council (MRC) Public Health Intervention Development (PHIND) award and the University of Edinburgh.

JFJ, LM, RS, RM, JA, SO and DJC report no competing interests related to the manuscript.

**PATIENT AND PUBLIC INVOLVEMENT:** Patients and/or the public are integral to the conduct of the research outlined. Please refer to the methods section for further details.

**Twitter:** @RECREATE\_stroke

## **References**

1. Tremblay MS, Aubert S, Barnes JD, Saunders TJ, Carson V, Latimer-Cheung AE, et al. Sedentary behavior research network (SBRN)–terminology consensus project process and outcome. *International journal of behavioral nutrition and physical activity*. 2017;14:1-17.
2. Owen N, Sugiyama T, Eakin EE, Gardiner PA, Tremblay MS, Sallis JF. Adults' sedentary behavior: determinants and interventions. *American journal of preventive medicine*. 2011;41(2):189-96.
3. Rezende LFMD, Rodrigues Lopes M, Rey-López JP, Matsudo VKR, Luiz OdC. Sedentary behavior and health outcomes: an overview of systematic reviews. *PloS one*. 2014;9(8):e105620.
4. Tremblay MS, Colley RC, Saunders TJ, Healy GN, Owen N. Physiological and health implications of a sedentary lifestyle. *Applied physiology, nutrition, and metabolism*. 2010;35(6):725-40.
5. Dempsey PC, Biddle SJH, Buman MP, Chastin S, Ekelund U, Friedenreich CM, et al. New global guidelines on sedentary behaviour and health for adults: broadening the behavioural targets. *International Journal of Behavioral Nutrition and Physical Activity*. 2020;17(1):151.
6. Health UDo, Services H. Physical activity guidelines advisory committee. 2018 physical activity guidelines advisory committee scientific report. Published online. 2018.
7. Butler EN, Evenson KR. Prevalence of physical activity and sedentary behavior among stroke survivors in the United States. *Topics in stroke rehabilitation*. 2014;21(3):246-55.

- 1 8. English C, Healy GN, Coates A, Lewis L, Olds T, Bernhardt J. Sitting and activity time in people with  
2 stroke. *Physical therapy*. 2016;96(2):193-201.
- 3 9. Paul L, Brewster S, Wyke S, Gill JM, Alexander G, Dybus A, et al. Physical activity profiles and  
4 sedentary behaviour in people following stroke: a cross-sectional study. *Disability and rehabilitation*.  
5 2016;38(4):362-7.
- 6 10. Morton S, Fitzsimons C, Hall J, Clarke D, Forster A, English C, et al. Sedentary behavior after  
7 stroke: A new target for therapeutic intervention. SAGE Publications Sage UK: London, England; 2019.
- 8 11. Walker MF, Hoffmann TC, Brady MC, Dean CM, Eng JJ, Farrin AJ, et al. Improving the  
9 development, monitoring and reporting of stroke rehabilitation research: Consensus-based core  
10 recommendations from the Stroke Recovery and Rehabilitation Roundtable. *International Journal of Stroke*.  
11 2017;12(5):472-9.
- 12 12. Skivington K, Matthews L, Simpson SA, Craig P, Baird J, Blazeby JM, et al. A new framework for  
13 developing and evaluating complex interventions: update of Medical Research Council guidance. *bmj*.  
14 2021;374.
- 15 13. Voorberg WH, Bekkers VJ, Tummers LG. A systematic review of co-creation and co-production:  
16 Embarking on the social innovation journey. *Public management review*. 2015;17(9):1333-57.
- 17 14. Cane J, O'Connor D, Michie S. Validation of the theoretical domains framework for use in behaviour  
18 change and implementation research. *Implementation Science*. 2012;7(1):37.
- 19 15. Hall J, Morton S, Hall J, Clarke DJ, Fitzsimons CF, English C, et al. A co-production approach  
20 guided by the behaviour change wheel to develop an intervention for reducing sedentary behaviour after  
21 stroke. *Pilot and feasibility studies*. 2020;6(1):1-13.
- 22 16. Moore GF, Evans RE, Hawkins J, Littlecott H, Melendez-Torres G, Bonell C, et al. From complex  
23 social interventions to interventions in complex social systems: future directions and unresolved questions  
24 for intervention development and evaluation. *Evaluation*. 2019;25(1):23-45.
- 25 17. Moore GF, Audrey S, Barker M, Bond L, Bonell C, Hardeman W, et al. Process evaluation of  
26 complex interventions: Medical Research Council guidance. *bmj*. 2015;350.
- 27 18. May C, Finch T, Rapley T. Normalization process theory. *Handbook on Implementation Science*:  
28 Edward Elgar Publishing; 2020.
- 29 19. Sekhon M, Cartwright M, Francis JJ. Acceptability of healthcare interventions: an overview of  
30 reviews and development of a theoretical framework. *BMC health services research*. 2017;17(1):1-13.
- 31 20. Spradley JP. *Participant observation*: Waveland Press; 2016.
- 32 21. Clarke V, Braun V. Thematic analysis. *Encyclopedia of critical psychology*: Springer; 2014. p. 1947-  
33 52.
- 34 22. Ritchie J, Lewis J, Nicholls CM, Ormston R. *Qualitative research practice: A guide for social science  
35 students and researchers*: sage; 2013.

**Figure 1: Process Evaluation Flowchart**

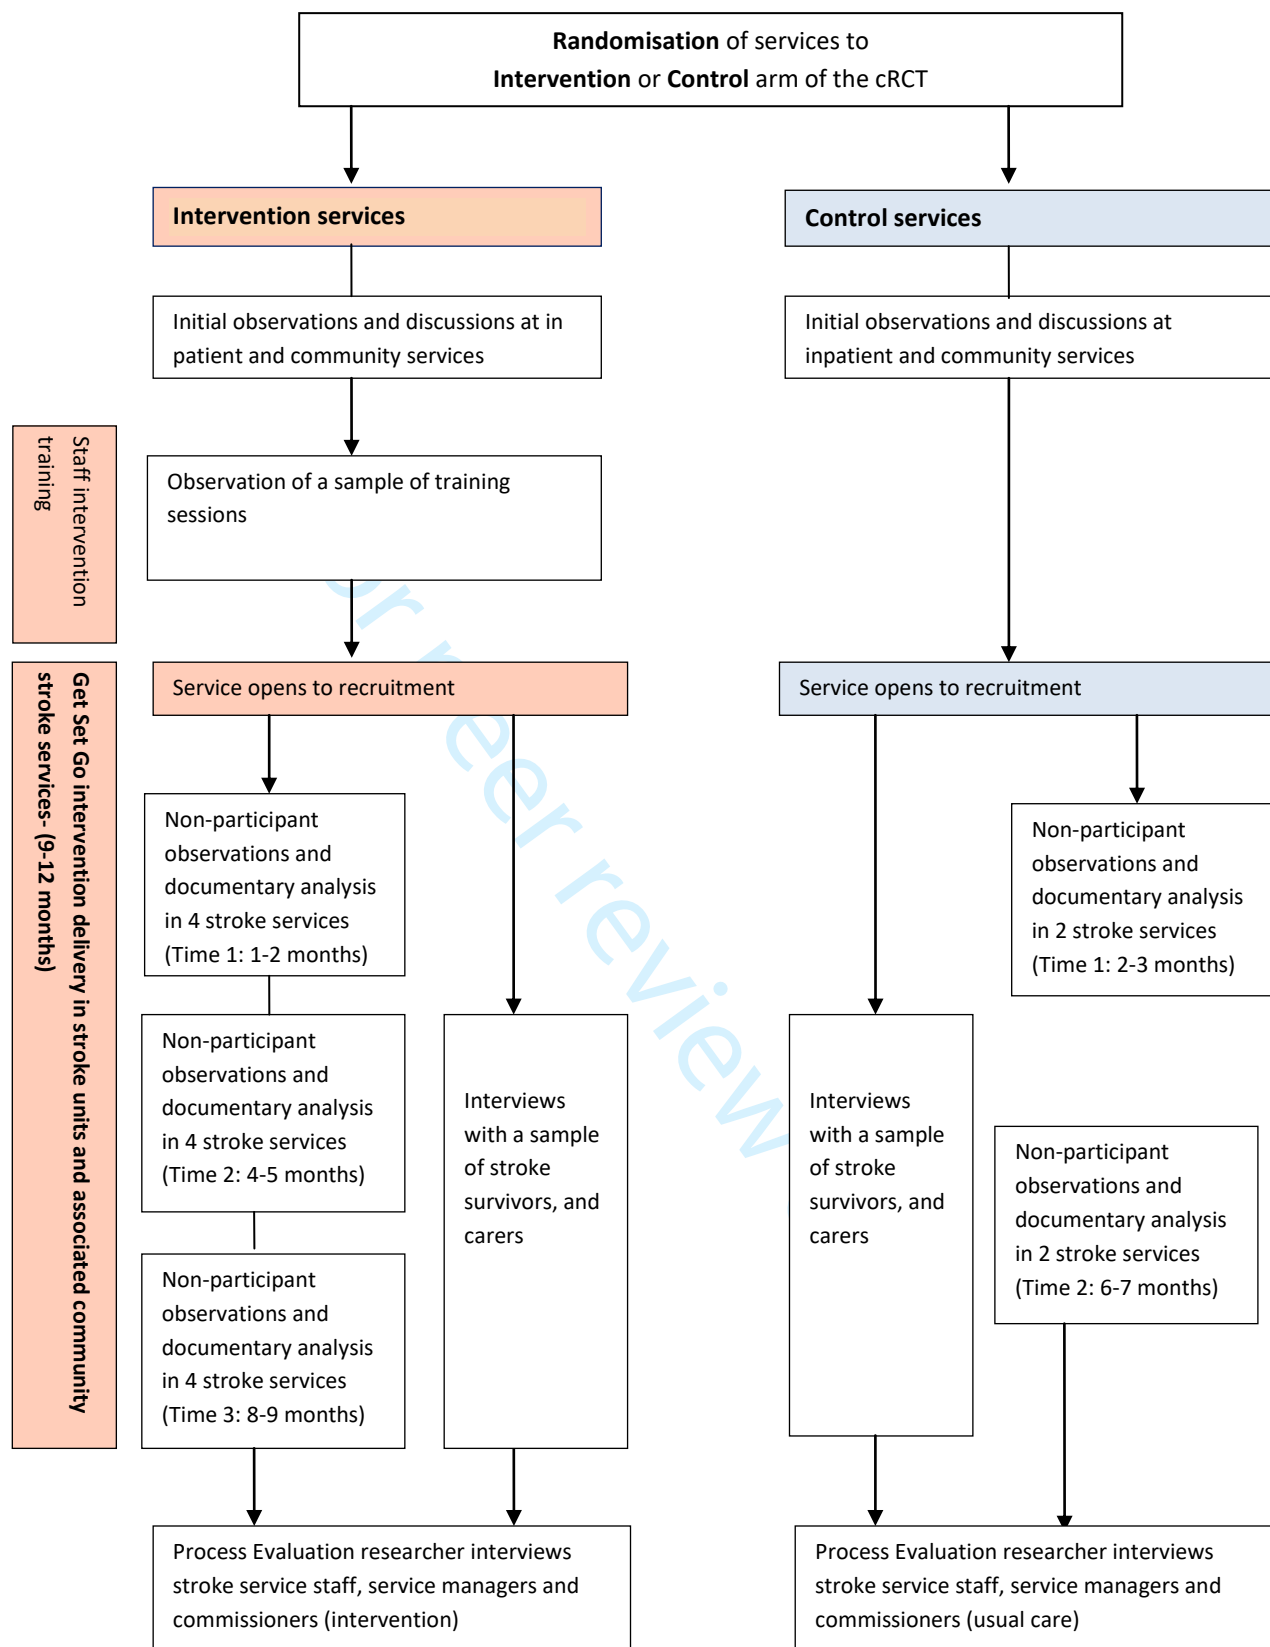

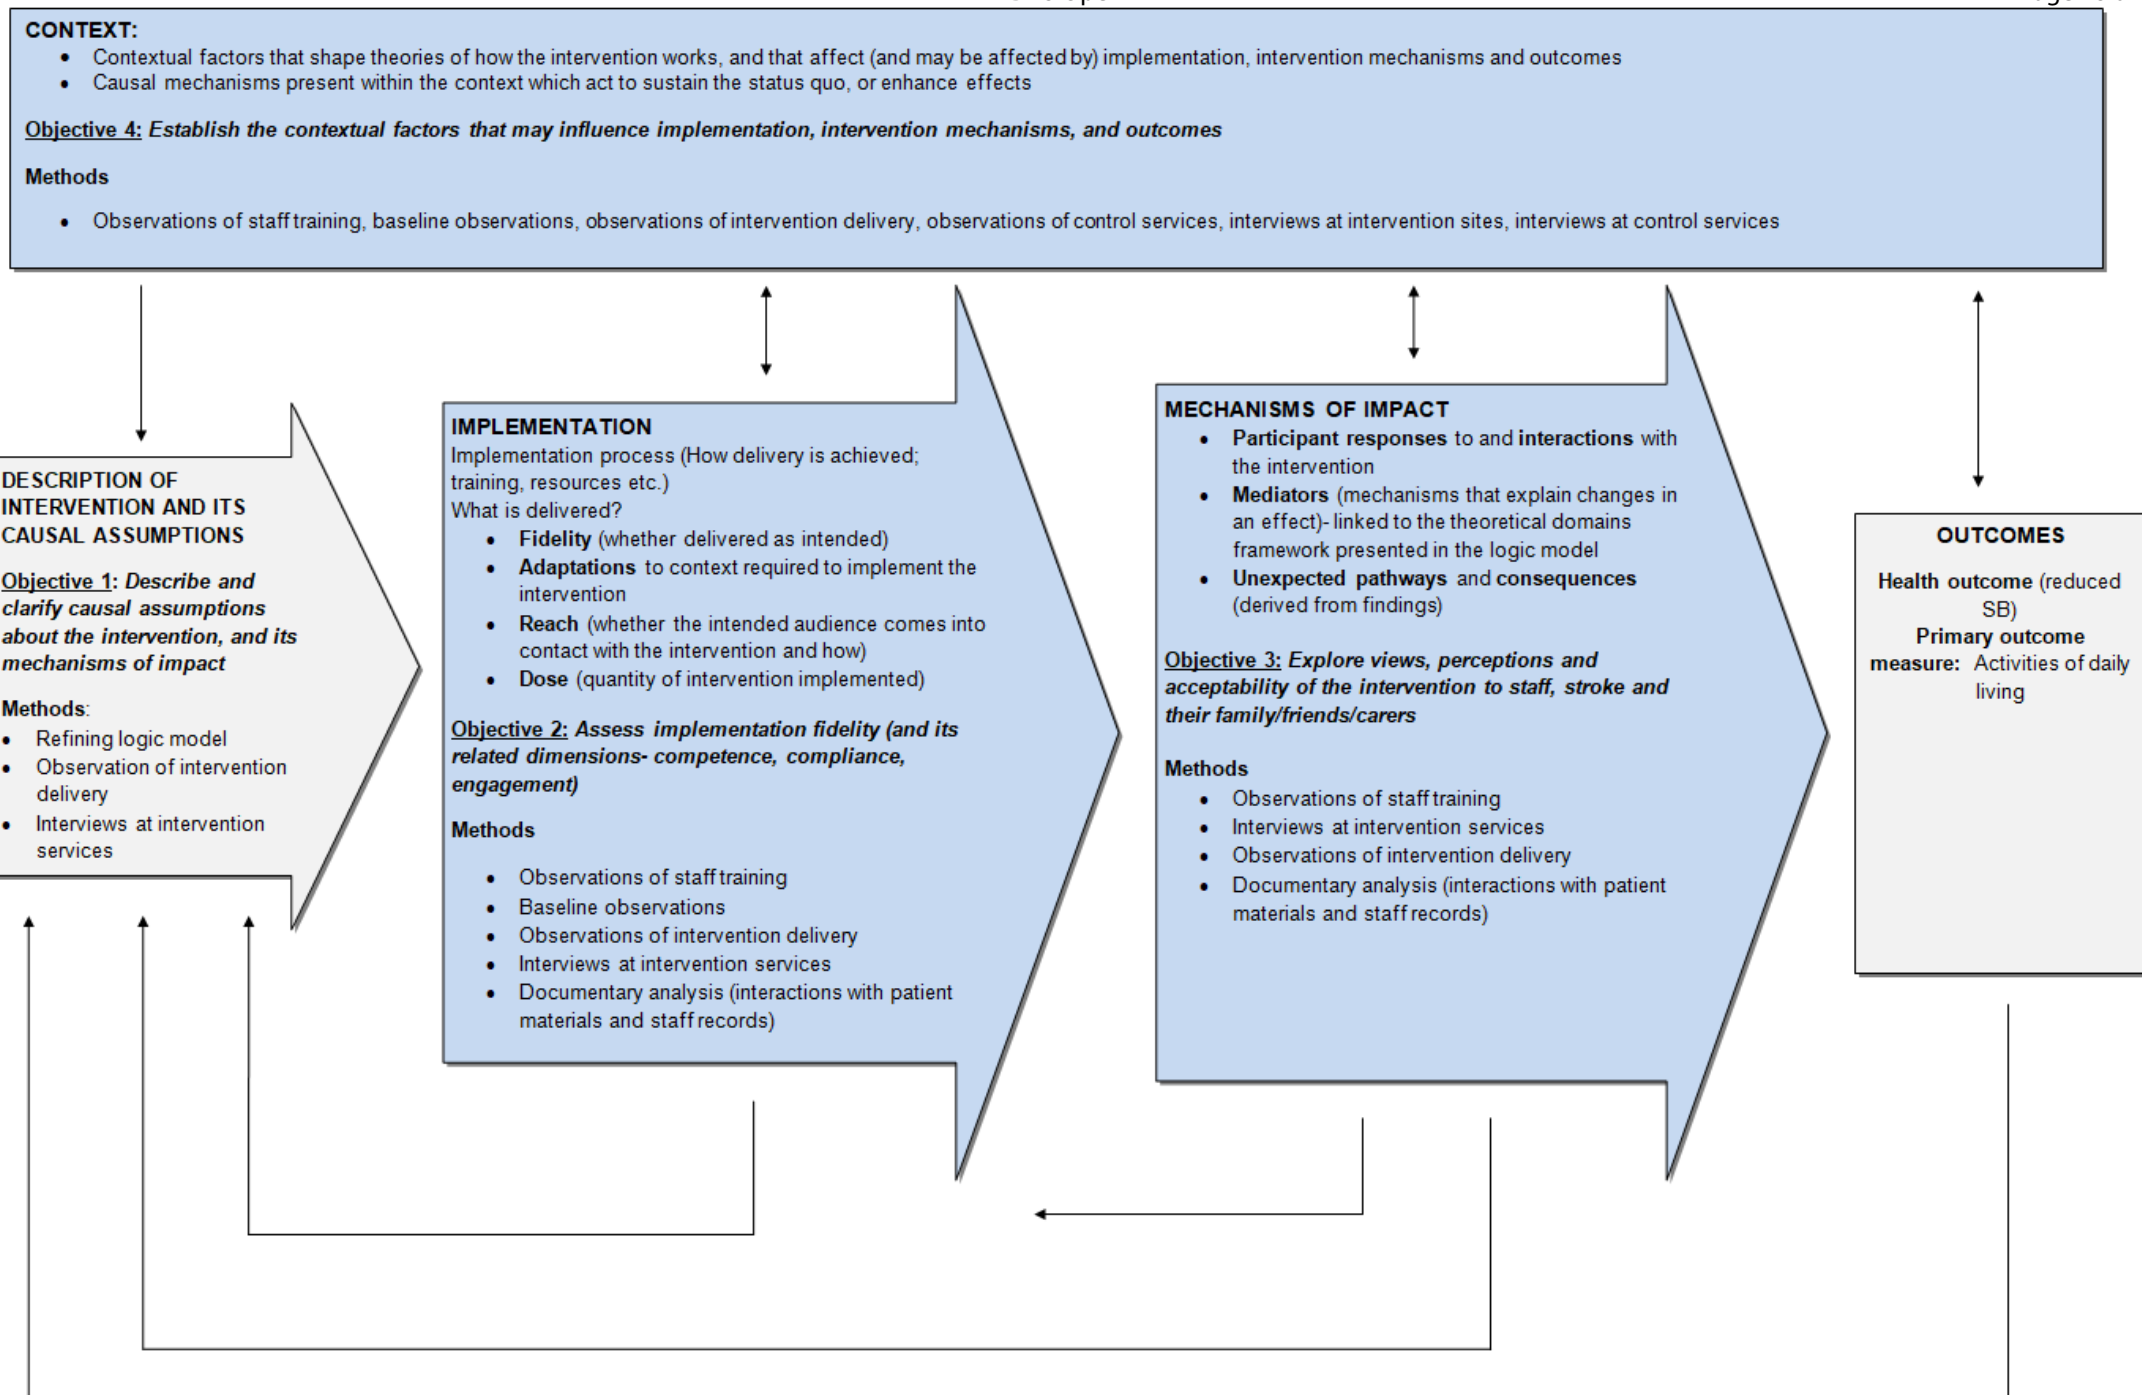

Figure 2: Process evaluation objectives and methods mapped to the MRC guidance by Moore et al., 2015

# BMJ Open

## An intervention to reduce sedentary behaviour and improve outcomes after stroke (Get Set Go): A study protocol for the process evaluation of a pilot cluster randomised controlled trial (RECREATE)

|                                 |                                                                                                                                                                                                                                                                                                                                                                                                                                                                                                                                                                                                                                                                                                                                                                                                                                                                                                                                                                                                                                                                                                                                                                                                                                                                                                                                                                                                                                                                                              |
|---------------------------------|----------------------------------------------------------------------------------------------------------------------------------------------------------------------------------------------------------------------------------------------------------------------------------------------------------------------------------------------------------------------------------------------------------------------------------------------------------------------------------------------------------------------------------------------------------------------------------------------------------------------------------------------------------------------------------------------------------------------------------------------------------------------------------------------------------------------------------------------------------------------------------------------------------------------------------------------------------------------------------------------------------------------------------------------------------------------------------------------------------------------------------------------------------------------------------------------------------------------------------------------------------------------------------------------------------------------------------------------------------------------------------------------------------------------------------------------------------------------------------------------|
| Journal:                        | <i>BMJ Open</i>                                                                                                                                                                                                                                                                                                                                                                                                                                                                                                                                                                                                                                                                                                                                                                                                                                                                                                                                                                                                                                                                                                                                                                                                                                                                                                                                                                                                                                                                              |
| Manuscript ID                   | bmjopen-2023-075363.R1                                                                                                                                                                                                                                                                                                                                                                                                                                                                                                                                                                                                                                                                                                                                                                                                                                                                                                                                                                                                                                                                                                                                                                                                                                                                                                                                                                                                                                                                       |
| Article Type:                   | Protocol                                                                                                                                                                                                                                                                                                                                                                                                                                                                                                                                                                                                                                                                                                                                                                                                                                                                                                                                                                                                                                                                                                                                                                                                                                                                                                                                                                                                                                                                                     |
| Date Submitted by the Author:   | 21-Jul-2023                                                                                                                                                                                                                                                                                                                                                                                                                                                                                                                                                                                                                                                                                                                                                                                                                                                                                                                                                                                                                                                                                                                                                                                                                                                                                                                                                                                                                                                                                  |
| Complete List of Authors:       | Johansson, Jessica; University of Leeds, Academic Unit of Ageing and Stroke Research, Leeds Institute of Health Sciences; Bradford Teaching Hospitals NHS Foundation Trust, Academic Unit of Ageing and Stroke Research<br>Shannon, Rosie; Bradford Teaching Hospitals NHS Foundation Trust, Academic Unit of Ageing and Stroke Research<br>Mossabir , Rahena; Bradford Teaching Hospitals NHS Foundation Trust, Academic Unit for Ageing and Stroke Research<br>Airlie, Jennifer; Bradford Teaching Hospitals NHS Foundation Trust, Academic Unit for Ageing and Stroke Research<br>Ozer, Seline; Bradford Teaching Hospitals NHS Foundation Trust, Academic Unit of Ageing and Stroke Research<br>Moreau, Lauren; University of Leeds, Leeds Institute of Clinical Trials Research<br>Farrin, Amanda; University of Leeds, Clinical Trials Research Unit<br>Mead, Gillian; The University of Edinburgh Centre for Clinical Brain Sciences<br>English, Coralie; The University of Newcastle, School of Health Sciences<br>Fitzsimons, Claire F.; University of Edinburgh Physical Activity for Health Research Centre<br>Clarke, David; University of Leeds, Academic Unit of Ageing and Stroke Research ; Bradford Teaching Hospitals NHS Foundation Trust, Academic Unit of Ageing and Stroke Research<br>Forster, Anne; University of Leeds, Academic Unit of Ageing and Stroke Research ; Bradford Teaching Hospitals NHS Foundation Trust, Academic Unit of Ageing and Stroke Research |
| <b>Primary Subject Heading</b>: | Rehabilitation medicine                                                                                                                                                                                                                                                                                                                                                                                                                                                                                                                                                                                                                                                                                                                                                                                                                                                                                                                                                                                                                                                                                                                                                                                                                                                                                                                                                                                                                                                                      |
| Secondary Subject Heading:      | Research methods                                                                                                                                                                                                                                                                                                                                                                                                                                                                                                                                                                                                                                                                                                                                                                                                                                                                                                                                                                                                                                                                                                                                                                                                                                                                                                                                                                                                                                                                             |
| Keywords:                       | Stroke < NEUROLOGY, PUBLIC HEALTH, QUALITATIVE RESEARCH, Clinical trials < THERAPEUTICS                                                                                                                                                                                                                                                                                                                                                                                                                                                                                                                                                                                                                                                                                                                                                                                                                                                                                                                                                                                                                                                                                                                                                                                                                                                                                                                                                                                                      |
|                                 |                                                                                                                                                                                                                                                                                                                                                                                                                                                                                                                                                                                                                                                                                                                                                                                                                                                                                                                                                                                                                                                                                                                                                                                                                                                                                                                                                                                                                                                                                              |

1  
2  
3  
4  
5  
6  
7  
8  
9  
10  
11  
12  
13  
14  
15  
16  
17  
18  
19  
20  
21  
22  
23  
24  
25  
26  
27  
28  
29  
30  
31  
32  
33  
34  
35  
36  
37  
38  
39  
40  
41  
42  
43  
44  
45  
46  
47  
48  
49  
50  
51  
52  
53  
54  
55  
56  
57  
58  
59  
60

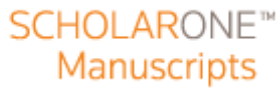



1 **An intervention to reduce sedentary behaviour and improve outcomes after**  
2  
3 **stroke (Get Set Go): A study protocol for the process evaluation of a pilot**  
4  
5 **cluster randomised controlled trial (RECREATE)**  
6  
7

8 **AUTHORS:** Jessica Faye Johansson<sup>1,2</sup>, Rosie Shannon<sup>2</sup>, Rahena Mossabir <sup>2</sup>, Jennifer Airlie <sup>2</sup>, Seline  
9  
10 Ozer<sup>2</sup>, Lauren Moreau<sup>3</sup>, Amanda Farrin <sup>3</sup>, Gillian Mead <sup>4</sup>, Coralie English<sup>5,6</sup>, Claire Fitzsimons<sup>7</sup>, David J.  
11  
12 Clarke<sup>1,2</sup>, Anne Forster<sup>1,2</sup> on behalf of the RECREATE Programme Management Group  
13  
14

15 Corresponding author: Dr Jessica Faye Johansson <sup>1,2</sup> : [Jessica.johansson@bthft.nhs.uk](mailto:Jessica.johansson@bthft.nhs.uk)  
16  
17

18 <sup>1</sup> University of Leeds, Leeds Institute of Health Sciences, Academic Unit for Ageing and Stroke Research,  
19  
20 UK  
21

22 <sup>2</sup> Bradford Institute for Health Research, Academic Unit of Ageing and Stroke Research, UK  
23

24 <sup>3</sup> Clinical Trials Research Unit, Leeds Institute of Clinical Trials Research, University of Leeds, UK  
25

26 <sup>4</sup> Centre for Clinical Brain Sciences, University of Edinburgh, Edinburgh, UK.  
27

28 <sup>5</sup> School of Health Sciences University of Newcastle, Newcastle, Australia.  
29

30 <sup>6</sup> Heart and Stroke Research Program, Hunter Medical Research Institute, Newcastle, Australia.  
31

32 <sup>7</sup> Physical Activity for Health Research Centre, University of Edinburgh, Edinburgh, UK  
33  
34

35  
36  
37 Word count : 4773  
38

39 Abstract word count 294  
40

41  
42 **ABSTRACT:**  
43

44  
45 **Introduction:** Stroke survivors spend long periods of time engaging in sedentary behaviour even when their  
46  
47 functional recovery is good. In the RECREATE programme, an intervention aimed at reducing sedentary  
48  
49 behaviour ('Get Set Go') will be implemented and evaluated in a pragmatic external pilot cluster randomised  
50  
51 controlled trial (cRCT) with embedded process and economic evaluations. We report the protocol for the  
52  
53 process evaluation which will address the following objectives: 1) Describe and clarify causal assumptions  
54  
55 about the intervention, and its mechanisms of impact; 2) Assess implementation fidelity; 3) Explore views,  
56  
57  
58  
59  
60

perceptions and acceptability of the intervention to staff, stroke survivors and their carers; 4) Establish the contextual factors that influence implementation, intervention mechanisms, and outcomes.

**Methods and analysis:** This pilot trial will be conducted in 15 UK based National Health Service (NHS) stroke services. This process evaluation study, underpinned by the Medical Research Council (MRC) guidance will be undertaken in six of the randomised services (four intervention, two control). Data collection includes: observations of staff training sessions, non- participant observations in inpatient and community settings, semi-structured interviews with staff, patients and carers, and documentary analysis of key intervention components. Additional quantitative implementation data will be collected in all sites. Training observations and documentary analysis data will be summarised, with other observational and interview data analysed using Thematic Analysis. Relevant theories will be used to interpret the findings, including: the Theoretical Domains Framework, Normalisation Process Theory and the Theoretical Framework of Acceptability. Anticipated outputs include: recommendations for intervention refinements (both content and implementation); a revised implementation plan, and a refined logic model.

**Ethics and dissemination:** The study was approved by Yorkshire & The Humber - Bradford Leeds Research Ethics Committee (REC reference:19/YH/0403). Findings will be disseminated via peer review publications, and national and international conference presentations.

**Trial registration number:** ISRCTN82280581

## STRENGTHS AND LIMITATIONS OF THE STUDY:

- The process evaluation is underpinned by the Medical Research Council (MRC) guidance for process evaluations and addresses all key functions outlined in the guidance including implementation, mechanisms of impact and context.
- Theory based, comprehensive process evaluation involving staff, patients and family, friends and carers in intervention and control services.
- The process evaluation will be conducted longitudinally, providing information about changes over time.
- The in-depth process evaluation will be conducted in a proportion of trial services, however the implementation team will meet regularly with services not included in the process evaluation to

54 provide an insight into implementation activity. We will also report quantitative implementation data  
1  
2  
55 collected across all sites.  
3  
4

## 56 INTRODUCTION 6

7  
8  
57 Sedentary behaviour (SB) is defined as any waking behaviour characterised by low energy expenditure  
10  
58 ( $\leq 1.5$  Metabolic Equivalent of Task (METs)) while in a sitting, lying or reclining posture (1). In this study, we  
12  
59 use the common approach of interpreting sedentary behaviour as sitting/lying down during waking hours  
14  
60 without being otherwise active (2). SB is the focus of considerable clinical, policy and research interest, as  
16  
61 the evidence supporting its detrimental effects on health and well-being increases (1, 3-6). Higher levels of  
18  
62 moderate-vigorous physical activity (MVPA) may reduce risk associated with more daily sedentary time (5).  
20  
63 However, achieving recommended levels of MVPA to offset potential harms of high levels of SB (i.e.  $>300$   
22  
64 min/week of MVPA) is likely to be challenging (5), particularly for stroke survivors. Evidence suggests this  
24  
65 population group are more sedentary and engage in longer unbroken bouts of sedentary behaviour than  
26  
66 other population groups (7-9) and this appears to be independent of the level of functional recovery (10-12)  
28  
67 At six months after stroke physical ability only has a small influence on time spent sitting among those living  
30  
68 at home (10). Epidemiological studies indicate that stroke survivors are in the highest quartile for  
32  
69 cardiovascular risk and increased sedentary behaviour adds to this rising risk. Thus, reducing SB has been  
34  
70 suggested as a new target for therapeutic intervention after stroke (13).  
36  
37  
38

39  
40  
41 In 2016, an international group of stroke recovery and rehabilitation experts reported that inadequate  
42  
43 theoretical intervention development may explain the lack of efficacy of many existing interventions  
44  
45 targeting people after stroke (14). The Medical Research Council (MRC) guidelines advocate the  
46  
47 importance of using theory and evidence in developing complex interventions (15). It has also been  
48  
49 suggested that taking a partnership approach (e.g. co-production) can facilitate the development of feasible  
50  
51 and context-sensitive interventions and may increase the likelihood of developing an intervention that is  
52  
53 efficacious, due to the active involvement of all relevant stakeholders (16).  
54

## 55 RECREATE Programme 56

79 Our National Institute for Health and Care Research (NIHR) funded seven year research programme  
1  
2 (RECREATE) seeks to develop and evaluate strategies for reducing SB after stroke to improve outcomes.  
3  
4 The Get Set Go intervention was developed using a structured process, guided by the Behaviour Change  
5  
6 Wheel (BCW) which incorporates the Theoretical Domains Framework (TDF) (17) in combination with a co-  
7  
8 production approach (18) and tested as part of a feasibility study. Get Set Go aims to decrease SB after  
9  
10 stroke by increasing the frequency and duration of standing and moving. The intervention is a whole  
11  
12 service intervention, designed to be implemented and embedded in routine practice. Delivery commences  
13  
14 in the inpatient stroke unit and continues once the stroke survivor is discharged home for at least 12 weeks.  
15  
16

17  
18 The intervention includes multiple components and focuses on:  
19

- 20 a) Educating staff and stroke survivors (and their family/ friends/ carers where appropriate) about the  
21  
22 importance of standing and moving after stroke;
- 23 b) Preparing and enabling staff to support and encourage stroke survivors to stand and move more in  
24  
25 everyday stroke care (as part of routine practice);
- 26 c) Encouraging stroke survivors to monitor their own standing and moving, with assistance from family/  
27  
28 friends/ carers where appropriate.

29  
30 As GSG is delivered at a service level, all clinical staff in services randomised to deliver the intervention will  
31  
32 be invited to attend a training session (~one hour). This will outline the intervention rationale and will  
33  
34 provide an overview of key intervention components to prepare staff for delivering GSG. Staff will  
35  
36 participate in practical tasks aimed at ensuring they feel confident to support and encourage stroke  
37  
38 survivors who are capable of standing independently or with the assistance of one to stand and move more  
39  
40 as part of routine stroke care. Staff will be asked to make recommendations for how much standing and  
41  
42 moving individuals should be doing based on their usual assessment techniques and clinical judgement.  
43  
44 They will be asked to regularly review these recommendations and modify these in line with stroke  
45  
46 survivors' capabilities and circumstances.  
47  
48

49  
50 Staff will be provided with a range of documents to record this activity. Stroke survivors will be encouraged  
51  
52 to form habits around standing and moving as part of their day by recording and monitoring this in an  
53  
54

107 information based guide. Staff will be encouraged to include families in the intervention so they can  
108 undertake a supportive role in encouraging standing and moving in the inpatient setting and when the  
109 stroke survivor returns home. A Template for Intervention Description and Replication (TIDieR) checklist  
110 (19) will be published with trial findings.

111 The RECREATE multicentre cluster randomised controlled trial (cRCT) aimed to evaluate the clinical and  
112 cost effectiveness of the Get Set Go intervention. NHS stroke services randomised to the intervention  
113 group will be trained to deliver the intervention, whilst those randomised to the control group will continue  
114 usual practice. All patients in the stroke services randomised to the intervention will be exposed to Get Set  
115 Go. The trial originally aimed to recruit 1,156 stroke survivors in 34 NHS stroke services; however due to  
116 issues associated with the worldwide COVID pandemic, a decision was made in agreement with the funder  
117 (NIHR) to reduce the trial in size and scope to become an external pilot trial. Accordingly, the recruitment  
118 target was revised to 300-400 participants from 15 NHS stroke services, and the objectives were amended  
119 as given a definitive evaluation of effectiveness was no longer be possible (protocol for the external pilot  
120 cRCT is reported separately). In view of this a decision was also made to reduce the number of process  
121 evaluation services from 10 to six. The primary outcome is extended activities of daily living 12 months  
122 following recruitment (Nottingham Extended Activities of Daily Living (NEADL)). Secondary outcomes  
123 include SB at 12 months, cost-effectiveness, disability, quality of life, and reduction of cardiovascular risk  
124 factors

### 125 **Process evaluation**

126 Complex interventions consist of multiple interacting components, and generate changes within complex  
127 systems including the interactions between individuals and teams (e.g. providers and recipients) (20). As  
128 Get Set Go includes multiple components and targets the behaviour of health professionals, stroke  
129 survivors, and their carers/family/friends (hereafter all referred to as carers in this paper) in inpatient and  
130 community settings, it is important to understand how the complexities of human behaviour and  
131 implementation across these different contexts impacts outcomes. Process evaluations are integral to  
132 understanding factors which may have contributed to the trial outcomes, and to help understand and  
133 evaluate the theoretical assumptions underpinning an intervention (21).

The MRC guidance (15, 21) recommends providing a clear description of the intervention and its causal assumptions and Moore et al. (21) state that the interpretation of intervention outcomes should be informed by an investigation of three key functions: (1) implementation, 2) mechanisms of impact and 3) context) (21). In our process evaluation, the MRC guidance ensured we developed a detailed programme theory represented in a logic model and supported with a written description of how the intervention is intended to work. We also aligned our objectives with the three key functions and selected appropriate methods, according to examples provided by Moore et al. (13).

This paper describes the protocol for the pre-planned mixed-methods process evaluation embedded in the RECREATE pilot cRCT.

## **Aims and objectives**

The process evaluation aims to explore and understand the implementation of Get Set Go and how it is experienced and understood by providers and recipients by addressing the following objectives:

- 1) Describe and clarify causal assumptions about the intervention, and its mechanisms of impact
- 2) Describe intervention delivery and assess intervention fidelity
- 3) Explore views, perceptions and acceptability of the intervention to staff, stroke survivors and their carers
- 4) Establish the contextual factors that may influence implementation, intervention mechanisms, and outcomes

## **METHODS AND ANALYSIS**

A mixed- methods process evaluation underpinned by the MRC guidance for process evaluations will be conducted by two researchers (JFJ and RS). JFJ is a Senior Research Fellow leading the process evaluation and RS is a Research fellow working on the process evaluation. Both are experienced qualitative researchers, and each have 15 years of experience in conducting a range of qualitative methods analytical approaches. This approach will combine non-participant observations of staff training sessions, non-participant observations in both inpatient and community settings; semi-structured interviews with stroke survivors, carers and staff, and documentary analysis of key intervention documents.

162 **PATIENT AND PUBLIC INVOLVEMENT:** Patients and/or the public are integral to the conduct of the  
1  
2  
163 research outlined.

### 164 165 **Study setting**

166 The RECREATE project will be conducted in UK stroke services comprising inpatient and community  
10  
167 settings. The process evaluation will be undertaken in six services (four intervention, two control) that will  
12  
168 be included in a staggered nature due to the nature of the trial set-up. We will seek to include services that  
14  
169 vary according to geographical location and stroke service pathways. For example, some services will  
16  
170 include a hyper-acute, acute and rehabilitation service in one location, whereas others will be across  
18  
171 different locations. In terms of community service provision, some will have shorter Early Supported  
20  
172 Discharge (ESD) services whereas others will have services that are not time limited. Data collection will  
22  
173 begin in August 2021 and is expected to be complete in May 2023 (Figure 1). Data collection activity will be  
23  
174 shared by JFJ and RS. Each researcher will undertake activity at three of the six sites each. Where needed  
25  
175 to manage the workload, there may be instances where JFJ or RS share activity within their allocated sites.  
27  
29  
30  
31  
32  
33  
34  
35  
36  
37  
38  
39  
40  
41  
42  
43  
44  
45  
46  
47  
48  
49  
50  
51  
52  
53  
54  
55  
56  
57  
58  
59  
60

178  
1  
2  
179  
4  
180  
6  
7  
181  
9  
10  
182  
12  
183  
14  
184  
16  
17  
185  
19  
20  
186  
22  
23  
187  
25  
26  
188  
28  
29  
189  
31  
32  
190  
34  
35  
191  
36  
37  
38  
192  
39  
40  
41  
193  
42  
43  
44  
194  
45  
46  
47  
195  
48  
49  
196  
51  
52  
197  
54  
55  
198  
57  
58  
199  
60

**[Insert Figure 1: Process Evaluation Flowchart]**

For peer review only



## Theoretical approach

The MRC guidance for process evaluations (21) guided this process evaluation to facilitate a comprehensive understanding of factors that influence whether an intervention is effective or ineffective. The guidance also provides flexibility to select relevant theories. Figure 2 shows how objectives and data collection methods fit with the MRC guidance (21).

**[Insert Figure 2: Process evaluation objectives and methods mapped to the MRC guidance (Moore et al., 2015)]**

For peer review only

208 The Get Set Go intervention is designed to target the behaviours of staff, patients and carers, and will be  
209 implemented in complex settings; therefore the process evaluation focuses on individual-level behaviour  
210 change, and implementation processes. During intervention development, the TDF (Cane et al., 2012) was  
211 used whilst working through the BCW, to identify determinants of behaviour that need to be addressed with  
212 the intervention (e.g. skills, knowledge, and beliefs). Behaviour Change Techniques (BCTs) were then  
213 selected to address behaviours for the different individuals e.g. staff, patients and carers (18). The  
214 determinants are presented in the logic model as part of representing the intervention's intended  
215 mechanisms of impact; one of the key functions according to Moore et al. (21).

219 To address the other two key functions (implementation and context), an implementation plan was  
220 developed based on the findings from the feasibility study. This expands the information in the logic model  
221 to outline in detail the processes that staff would ideally engage in to implement the intervention.  
222 Normalisation Process Theory (NPT) was used to formulate the implementation plan, based on four  
223 constructs: coherence, cognitive participation, collective action, and reflexive monitoring (22).

231 The theoretical framework of acceptability (23) is another important framework in this process evaluation as  
232 part of addressing objective 3. It comprises seven constructs: affective attitude, burden, ethicality,  
233 intervention coherence, opportunity costs, perceived effectiveness and self-efficacy. This framework, along  
234 with the TDF and NPT, will all be used to inform the data collection and the interpretation and analysis of  
235 findings.

### 239 **Study participants**

240 Participants (staff, patients and in some cases carers) included in the study will be recruited from  
241 intervention and control services. They will be invited to take part in observations and interviews. See  
242 Table 1 for the eligibility criteria.

**Table 1: Eligibility criteria**

|                       | <b>Inclusion criteria</b>                                                                                                                                                                                                                                                                                                                                                                                                                                                                                                                                                                                                                                                                                                                                                                                                                                                                                                                                                               | <b>Exclusion criteria</b>                                                                                                                                                                                             |
|-----------------------|-----------------------------------------------------------------------------------------------------------------------------------------------------------------------------------------------------------------------------------------------------------------------------------------------------------------------------------------------------------------------------------------------------------------------------------------------------------------------------------------------------------------------------------------------------------------------------------------------------------------------------------------------------------------------------------------------------------------------------------------------------------------------------------------------------------------------------------------------------------------------------------------------------------------------------------------------------------------------------------------|-----------------------------------------------------------------------------------------------------------------------------------------------------------------------------------------------------------------------|
| <b>Stroke patient</b> | <ul style="list-style-type: none"> <li>• Aged <math>\geq 16</math> years at time of stroke</li> <li>• Clinical diagnosis of new or recurrent ischaemic or haemorrhagic (excluding subarachnoid haemorrhage) stroke</li> <li>• Require manual contact of no more than one person to stand to prevent falling (continuous or intermittent light touch to assist balance or co-ordination, i.e., not to support body weight)</li> <li>• Plan to live in the community post-discharge</li> <li>• For individual focused observations (non-participant) of care and treatment or individual activity related to intervention provision: are able and willing to provide written informed consent or for whom a consultee declaration (England) is provided</li> <li>• For interviews: willing to provide consent to follow-up contact for interview, prior to the point of discharge from the stroke service and are able to provide informed consent</li> <li>• English-speaking</li> </ul> | <ul style="list-style-type: none"> <li>• Receiving palliative care</li> <li>• Due to be discharged outside the defined geographical area of the associated community service(s) participating in the trial</li> </ul> |

|                                                                                                                                                                                                                                          |                                                                                                                                                                                                                                                                                                                                                                                                                                                                                                                                                                                      |                                                                                                    |
|------------------------------------------------------------------------------------------------------------------------------------------------------------------------------------------------------------------------------------------|--------------------------------------------------------------------------------------------------------------------------------------------------------------------------------------------------------------------------------------------------------------------------------------------------------------------------------------------------------------------------------------------------------------------------------------------------------------------------------------------------------------------------------------------------------------------------------------|----------------------------------------------------------------------------------------------------|
| <p>1<br/>2<br/>3<br/>4<br/>5<br/>6<br/>7<br/>8<br/>9<br/>10<br/>11<br/>12<br/>13<br/>14<br/>15<br/>16<br/>17<br/>18<br/>19</p> <p><b>Carer</b></p>                                                                                       | <ul style="list-style-type: none"> <li>• Aged <math>\geq 16</math> years</li> <li>• Family member or friend regularly engaging with a stroke survivor participant (&gt;once per fortnight)</li> <li>• Able to provide informed consent</li> <li>• Stroke patient agrees for carer to be present in interview or observation</li> <li>• English-speaking</li> </ul>                                                                                                                                                                                                                   | <ul style="list-style-type: none"> <li>• Stroke patient does not consent to participate</li> </ul> |
| <p>20<br/>21<br/>22<br/>23<br/>24<br/>25<br/>26<br/>27<br/>28<br/>29<br/>30<br/>31<br/>32<br/>33<br/>34<br/>35<br/>36<br/>37<br/>38<br/>39<br/>40<br/>41<br/>42<br/>43<br/>44<br/>45<br/>46<br/>47<br/>48<br/>49</p> <p><b>Staff</b></p> | <ul style="list-style-type: none"> <li>• A registered physiotherapist, occupational therapist, nurse, doctor; or rehabilitation/ therapy assistant, Stroke Care Coordinator or other multidisciplinary team member working in a participating stroke service for a significant amount of time each week (e.g. 20 hours per week)</li> <li>• Are able and willing to provide written/verbal informed consent for observations of care and treatment related to the Get Set Go intervention provided as part of the stroke service (either in hospital or in the community)</li> </ul> |                                                                                                    |

50  
51  
52  
53  
54  
55  
56  
57  
58  
59  
60

We aim to recruit staff for interviews across inpatient and community settings; 10 in intervention services (including two in a managerial position), and 6 in control services (one in a managerial position). We aim to recruit five patients in each of the intervention and control services. Patients will be asked if they would like a carer to be present in the interview.

242  
1  
243 Participants will provide either verbal or written consent (depending on the circumstances) to take part in  
3  
4  
244 focused non-participant observations and semi-structured interviews. Participants are free to withdraw at  
5  
6  
245 any time without affecting their treatment. Participants will be made aware that if they withdraw, data  
7  
8  
246 collected up to that point will be included in analysis unless they request otherwise. Data will be removed  
9  
10  
247 on request provided it is still feasible to do so depending on the stage of write up.  
11  
12

### 248 14 249 **Data collection methods** 16

250 Qualitative data will contribute to understanding intervention mechanisms and their impacts, intervention  
18  
251 fidelity, perceptions of the intervention and the extent to which it is acceptable and the contextual factors  
20  
252 that may influence implementation, intervention mechanisms and outcomes. Quantitative data  
22  
253 (documentary analysis and data relating to implementation) will provide additional insights into intervention  
24  
254 fidelity. Table 2 provides an overview of all data to be collected.  
26  
27

### 255 28 29 **Table 2: An overview of data collection methods for the process evaluation** 30 31 32 33 34 35 36 37 38 39 40 41 42 43 44 45 46 47 48 49 50 51 52 53 54 55 56 57 58 59 60

|              | Data collection                               | Setting (COVID adaptation)                              | Timing                                                               | Quantities                                                                                                                              | Aims (Objectives)                                                                                                                                                | Data collection informed by                                                                                                                                                          | Analysis method                            |
|--------------|-----------------------------------------------|---------------------------------------------------------|----------------------------------------------------------------------|-----------------------------------------------------------------------------------------------------------------------------------------|------------------------------------------------------------------------------------------------------------------------------------------------------------------|--------------------------------------------------------------------------------------------------------------------------------------------------------------------------------------|--------------------------------------------|
| Observations | Training at intervention services             | Inpatient and community (Observe via video call)        | As training is delivered                                             | Inpatient and community combined: ~1 hour each session, 2-3 sessions per service                                                        | Intervention delivery and engagement (Objectives 2, 3, 4)                                                                                                        | Observational framework listing intervention components and behaviours expected if delivered with fidelity.                                                                          | Descriptive summaries, using MRC framework |
|              | Baseline at intervention and control services | Inpatient and community (Staff telephone conversations) | Before intervention delivery                                         | <b>Inpatient:</b> ~5 visits (20 hours) including ~3 therapy sessions, per service.<br><b>Community:</b> ~3 therapy sessions per service | Understand usual practice at the service, including how staff support standing and moving (Objectives 2, 4)                                                      | Researcher fieldnotes, informed by Spradley's descriptive question matrix (24)                                                                                                       | Thematic analysis                          |
|              | Time points 1, 2 & 3 at intervention services | Inpatient and community (Staff telephone conversations) | 1-2 months, 4-5 months & 8-9 months after starting trial recruitment | <b>Inpatient:</b> ~8 visits (32 hours) including ~3 therapy sessions, per service.<br><b>Community:</b> ~3 therapy sessions per service | Fidelity of intervention delivery, and influencing factors (Objectives 1, 2, 3, 4)                                                                               | Observational framework listing behaviours and intervention use expected if delivered with fidelity. Researcher fieldnotes, informed by Spradley's descriptive question matrix (24). | Thematic analysis                          |
|              | Time points 1 & 2 at control services         | Inpatient and community (Staff telephone conversations) | 2-3 months & 6-7 months after starting trial recruitment             | <b>Inpatient:</b> ~5 visits (20 hours) including ~3 therapy sessions, per service<br><b>Community:</b> ~3 therapy sessions per service  | Understand usual practice at the service, including how staff support standing and moving, and differences/similarities with intervention services (Objective 4) | Researcher fieldnotes, informed by Spradley's descriptive question matrix (24).                                                                                                      | Thematic analysis                          |
|              | Documentary analysis                          | Inpatient and community (In                             | Alongside intervention                                               | Complete documentary                                                                                                                    | Capture use and delivery (adherence & compliance) of                                                                                                             | Documentary analysis form informed by fidelity                                                                                                                                       | Descriptive summaries                      |

|                            |                                                       |                                                           |                                                    |                                                                         |                                                                                                                                                                                                       |                                                                                                                |                    |
|----------------------------|-------------------------------------------------------|-----------------------------------------------------------|----------------------------------------------------|-------------------------------------------------------------------------|-------------------------------------------------------------------------------------------------------------------------------------------------------------------------------------------------------|----------------------------------------------------------------------------------------------------------------|--------------------|
|                            | intervention services (Time points 1, 2 and 3)        | patients home if unable to attend wards)                  | service observations                               | analysis form observation time points 1, 2 & 3                          | intervention components (e.g. stroke patient use of intervention components) (Objective 2)                                                                                                            | expectations                                                                                                   |                    |
| Semi structured interviews | Stroke patients (and carers) at intervention services | Patients' own home (Telephone or video call)              | ~4-6 months after service started the intervention | Inpatient and community combined: n= 5 per service                      | Explore stroke patient and carer experiences and views of standing and moving after stroke. Explore intervention use, acceptability, impact and barriers/facilitators. (Objectives 1, 2, 3, 4)        | Topic guide informed by normalisation process theory (22) and the intervention acceptability framework (23).   | Framework analysis |
|                            | Staff at intervention services                        | Inpatient and community setting (Telephone or video call) | Shortly after service stops using the intervention | Inpatient and community combined: n=10 per service (including 2 senior) | Explore views on supporting standing and moving after stroke. Explore staff views of the intervention and barriers/facilitators for embedding and sustaining the intervention (Objectives 1, 2, 3, 4) | Topic guide informed by normalisation process theory (22) and the intervention acceptability framework (23).   | Framework analysis |
|                            | Stroke patients (and carers) at control services      | Community (Telephone or video call)                       | ~6 months after trial recruitment starts           | Inpatient and community combined: n=5 per service                       | Explore stroke patient and carer experiences and views of standing and moving after stroke (Objective 4).                                                                                             | Topic guide informed by , normalisation process theory (22) and the intervention acceptability framework (23). | Framework analysis |
|                            | Staff at control services                             | Inpatient and community (Telephone or video call)         | ~9-12 months after starting trial recruitment      | Inpatient and community combined: n=6 per service (including 1 senior)  | Explore staff views on supporting standing and moving after stroke (Objective 4)                                                                                                                      | Topic guide informed by normalisation process theory (22) and the intervention acceptability framework (23).   | Framework analysis |

## Qualitative data

### **Non-participant observations in intervention and control services – general and focused**

Training observations will only be conducted in intervention services (Table 2). These will focus on the fidelity of training delivery i.e. they will establish whether the training is being delivered by the implementation team as intended. They will also focus on engagement and interactions between the implementers and the staff receiving the training. We have developed an observational framework to assist the researchers in conducting these observations.

In both intervention and control services, baseline observations followed by a series of general and focused observations at different time points (three further time points in intervention services and two in control services) will be conducted (figure 1). General observations will be conducted in ward areas or community settings to gain an overall understanding of care provided and how staff members interact with each other and with patients in these general spaces. Researchers will introduce themselves to staff and patients to explain why they are undertaking the observations. No formal consent will be required for general observations but staff and patients will have the opportunity to object to being observed. For focused observations of 1:1 therapy sessions, researchers will obtain consent from both the staff members and stroke patients engaging in the therapy session. We intend to include stroke patients with aphasia and those who lack capacity in these focused observations where they are willing. Conversations with staff will help to identify whether patients may need the accessible information sheets and consent forms; and there is also an option for consultees to provide consent on behalf of the patient in circumstances where they lack capacity (consultee declaration).

In both intervention and control services, the baseline observations will be conducted to establish a baseline understanding of the organisations and how stroke care is provided. Observations at two further time points at control services will have a similar focus to the initial baseline observations with some additional exploration of staff and patients' views on standing and moving after stroke. In intervention services, the observations at the three time points after baseline will be undertaken to explore the fidelity of intervention delivery (e.g. whether intervention documents were evident in the inpatient and community settings, whether staff are



286 encouraging standing and moving as part of their practice or talking to stroke survivors about GSG) and the  
287 factors that influence this, including: contextual factors (e.g. where intervention materials are stored, how the  
288 stroke service is configured, how daily routines are managed), competence of staff delivering the intervention;  
289 and the engagement of staff, stroke survivors and carers with the intervention materials (e.g. completion of  
290 documents)

291  
292 During general observations, researchers will look for evidence of the intervention being used/ adopted in  
293 inpatient and community environments. It will be an opportunity to identify changes to daily practice (from  
294 baseline) and whether there is evidence that the intervention is integrated into conversations and impacting  
295 on behavioural changes during day to day care. The focused observations will provide an opportunity to see  
296 if there are any specific changes to therapy and whether intervention language is used. For example  
297 instances of staff encouraging stroke survivors to stand and move in the time aside from therapy sessions.  
298 In both cases researchers would expect to see staff using or talking through intervention materials. If there  
299 are circumstances where this is not the case it would be an opportunity for the researchers to understand  
300 what factors are impacting upon implementation in the context of daily practice.

301  
302 In all cases, the researchers will write detailed notes during their observations and use Spradley's  
303 descriptive question matrix (24) as a guide for what to document. Researchers will interact with staff in  
304 instances where it feels appropriate to clarify what they have observed. However, they will not seek to get  
305 involved in conversations that interfere with the care being provided. Contextual features relevant to the  
306 stroke services, including relationships with social care, voluntary, or community agencies will also be  
307 considered.

### 308 309 **Semi- structured interviews**

310 Semi-structured interviews will be undertaken with a sample of staff, stroke survivors and their carers from  
311 the participating services (Table 2). Broadly, these interviews will be conducted in addition to the observations  
312 to provide further insights into different perceptions of the intervention, its acceptability and the factors that

influence whether it can be implemented. Table 1 outlines the inclusion and exclusion criteria for all participants.

### **Stroke survivor (and carers where appropriate)**

A proportion of participants will be invited to take part in a semi-structured interview if they have already consented to the trial and / or completed a 'consent to contact form' which indicates they are willing to be approached about participating in an interview. At the time of signing the initial consent for the trial it will be made clear that not all participants will be contacted regarding an interview and separate consent would be obtained if participants take part in interviews. Their details will be held securely at the CTRU and will be provided to the process evaluation researchers via a Secure File Transfer system.

The interviews will take place approximately four - six months after commencement of the Get Set Go intervention for each stroke patient, with some flexibility. Sampling for the participants across the services (intervention n = 20 across 4 services, control n = 10 across 2 services) will consider severity of stroke, gender, communication difficulties, occupational status and living arrangements (alone/with a carer).

Following initial contact via phone, email or post, interested participants will be provided with an information sheet via post or email. At this point JFJ and RS will check if an accessible information sheet is required.

Once they have had sufficient time to consider whether they would like to take part in an interview, potential participants will have the opportunity to ask any questions and if they are happy, an interview will be arranged. Stroke patients can express if they would like a carer to be present. Interviews will take place in the participants own home or via telephone/ video call if appropriate. Consent from stroke patients and where relevant, their carer will be sought prior to interview (process evaluation consent is separate from trial consent). The research teams recruiting the participants for the trial will have already established capacity. JFJ and RS are experienced researchers in this population and will be able to make judgements about capacity if there are any changes in circumstances at the point of the interview. Being able to provide consent is an inclusion criteria for the interviews, however there is an option for someone to provide consent as a witness in cases where stroke survivors have capacity but are unable to physically consent due to physical impairments post stroke (e.g. difficulty writing). Table 2 provides an overview of the focus of

340 these interviews. During interviews, stroke patients will be asked to share intervention materials they  
1 received, to facilitate the documentary analysis.  
2  
3  
4

342 We have also gained ethical approval to approach patients who have not consented to the trial and ask if  
5 they would like to take part in an interview. This increases our interviewee pool where needed and provides  
6  
7  
8 opportunity for participants to share their experiences of the intervention and the extent to which they think  
9  
10  
11 it is acceptable. To facilitate this, the individuals will be approached by a process evaluation researcher and  
12  
13  
14 provided with an information sheet and a 'consent to contact' form. Their carer (if available) will also be  
15  
16  
17 approached for consent to contact. They will subsequently be approached by the researcher to arrange  
18  
19  
20 consent and interview. All data will be held at Academic Unit of Ageing and Stroke Research (AUASR).  
21  
22

### 349 **Staff**

350 A sample of staff from across the services (intervention n = 40 across 4 services, control n = 12 across 2  
23  
24  
25 services) will be approached face to face at their work-place providing there are no COVID-19 restrictions  
26  
27  
28 in place. If COVID-19 restrictions interfere with recruitment, the researcher will liaise with a key member of  
29  
30  
31 staff to identify which staff may be interested in taking part in an interview. The aim is to interview a range  
32  
33  
34 of staff from across inpatient and community settings in different disciplines and levels of seniority.  
35  
36  
37 Following the initial approach, similar procedures to those outlined above for stroke survivors will be  
38  
39  
40 undertaken to ensure that staff are provided with an information sheet and given time to consider  
41  
42  
43 participation and ask questions. Staff interviews will take place as the intervention ceases at each service  
44  
45  
46 (approximately 9 months into intervention delivery). Table 2 outlines the focus of the interviews and how  
47  
48  
49 they differ between the intervention and control services. Fully informed consent will be obtained prior to  
50  
51  
52 the interview which will take place in a location of staffs' choosing or via telephone/video call.  
53  
54  
55

### 362 **Data collection materials:**

363 Documents have been created and will be used to facilitate the data collection process during the  
54  
55  
56 observations (Table 2). These include observational frameworks, topic guides and a documentary analysis  
57  
58  
59  
60

365 form. The researchers will also use the existing descriptive question matrix (24) to guide the focus of  
366 observations.

### 368 **Training observation framework**

369 The training observation framework was created to capture fidelity, competence and engagement in  
370 relation to training sessions delivered by the implementation team to intervention services. The framework  
371 will be used to guide the observations and score them (scale 1-5): whether the content for each slide was  
372 delivered as intended (fidelity), how well content was delivered (competence), and how engaged the  
373 facilitators and participants were during the session. Researchers will also take notes on environmental  
374 factors that might be influential, the extent to which there is staff buy-in to the intervention and any  
375 additional reflections or aspects to follow up.

### 377 **Fidelity framework (aligned with the logic model)**

378 We have created fidelity frameworks (one for inpatient, one for community settings) to be completed during  
379 observations in the inpatient and community setting. These list all intervention components and expected  
380 behaviour if the intervention is implemented with fidelity. As with the training framework, it captures  
381 competence and engagement. The competencies are aligned with TDF Framework components, included  
382 in the logic model.

### 384 **Implementation framework**

385 In addition to the frameworks, we will collect detailed information about the implementation of the  
386 intervention at each of the intervention services included in the process evaluation using the  
387 implementation plan described in the earlier theoretical approach section. We will write notes in each  
388 section of the plan and indicate what has been implemented as planned, and any additional unexpected  
389 implementation strategies. We will also highlight which constructs of NPT are being addressed and note  
390 cases where they are not being addressed as planned. This process will enhance our understandings of  
391 the implementation processes needed to successfully implement the intervention.

### 392 **Topic guides**

Topic guides for each of the different interviews (see table 2) were developed based on feasibility study findings, and have also been informed by NPT (22), the theoretical framework of acceptability (23), and the TDF (17). In line with NPT, questions focus on how staff make sense of the intervention (coherence); how they work together to build a community of practice which facilitates implementation (cognitive participation); the operational practices involved in enacting the practices (collective action) and the appraisal work to understand ways that the new practices affect those around them (reflexive monitoring). Questions to address acceptability have been included to address the seven constructs within the framework by Sekhon et al. (23). Questions focused on the TDF domains in the logic model have also been included to understand more about for example skills, knowledge, beliefs around reducing SB from the perspectives of staff, patients and where relevant their families, friends, carers. See supplementary file 1.

Interviews will be adapted to be inclusive of stroke patients, for instance by using accessible information sheets, adapting the topic guide / using appropriate images and writing down key words for people with aphasia. Interviews will be audio recorded and a summary of contextual factors written by the interviewer.

## Quantitative data

### **Documentary analysis form**

A documentary analysis form will be used during observations and interviews, conducted on patient-held intervention components (e.g. information guide used to record standing and moving) and staff-completed records. This form will document how many documents have been checked, how many are complete up to date, and the week in which completion stopped (if incomplete). These capture the recording of delivery of intervention components and provide evidence of fidelity.

### **Data analysis**

All data collected will be analysed to address the relevant objectives (Table 2). Training observations will be summarised with a focus on fidelity, acceptability and engagement and contextual factors that may have

419 influenced how the training was delivered or received. Relevant headings based on the MRC framework  
1  
2  
3 (e.g. fidelity, contextual factors) will be used to organise the data.  
4

421 Both observational and interview data will be subject to thematic analysis (25). Data will be analysed by a  
5  
6  
7  
8 minimum of two researchers (JFJ and RS). Observational data will be coded into a thematic framework,  
9  
10 and then related codes will be grouped together under thematic headings which convincingly capture and  
11  
12 explain the relationship between coded elements of text. The interviews will be transcribed verbatim and  
13  
14 anonymised. Data will be entered into NVivo 12 software (QSR International, 2018). Interview data will  
15  
16 separately be analysed using a thematic approach (25). To produce the thematic frameworks, a proportion  
17  
18 of the data will be coded independently (JFJ and RS) and key themes and subthemes will be identified to  
19  
20 form the frameworks. The same theories used to inform the topic guides (NPT (22) and the theoretical  
21  
22 framework of acceptability (23)) will be used to inform the thematic frameworks and themes that are  
23  
24 produced during the analysis of the observations and interviews. The logic model, including the domains  
25  
26 outlined in the TDF will also be considered when developing the frameworks and throughout the analysis  
27  
28 process.  
29

30  
31 The training summaries, fidelity frameworks that will be completed during observations, and the  
32  
33 implementation plan that will be populated based on meetings with the implementation team, and  
34  
35 observational and interview data will be used to support the interpretation of findings and will allow for  
36  
37 comparisons to be made between services with regards to implementation fidelity, competency and  
38  
39 engagement. Data from documentary analysis will be anonymised and summarised descriptively and will  
40  
41 similarly be used to aid the interpretation of findings.  
42  
43

44  
45  
46 Standard approaches to demonstrating trustworthiness and quality in qualitative research will be used,  
47  
48 including: the clear documentation of the research process (methods, analysis and any problems  
49  
50 encountered and solutions found); transparency of the development of the observational framework and  
51  
52 interview topic guides in-light of on-going analysis; documentation of the contextual features in which the  
53  
54 research was carried out; discussions of emerging findings among the research team; and researchers will  
55  
56 keep a reflexive diary (26).  
57  
58  
59  
60

447 The anticipated outputs of this evaluation include: recommendations for intervention refinements (both  
448 content and implementation); a revised implementation plan, and a refined logic model (and supporting  
449 written intervention description).

## 451 **ETHICAL APPROVAL AND DISSEMINATION**

452 The study has National Health Service (NHS) permission and was approved by Yorkshire & The Humber -  
453 Bradford Leeds Research Ethics Committee (REC reference: 19/YH/0403). In light of the COVID pandemic,  
454 an ethical amendment approved remote data collection where needed e.g., observations of staff training and  
455 audio recorded interviews via zoom. Findings will be disseminated via peer review publications, and national  
456 and international conference presentations.

## 458 **DISCUSSION**

459 Process evaluations are considered an essential part of designing and testing complex interventions (21).  
460 They allow us to understand in detail the myriad of complex factors, and complex processes that contribute  
461 to whether an intervention has an impact on outcomes. We intend to add to knowledge about: intervention  
462 theory and how interventions contribute to change; how interventions interact with their context, wider  
463 system dynamics and impacts on implementation; and how individuals experience interventions (patients,  
464 staff, and carers. We also anticipate that the findings will be informative and transferable to other similar  
465 research focused on evaluating complex interventions in complex settings.

467 **AUTHORS' CONTRIBUTIONS:** AF is lead grant holder and Chief Investigator, and will oversee the  
468 design and implementation of the trial. JFJ leads the embedded process evaluation and is responsible for  
469 planning, undertaking the research and reporting findings alongside RS. SO and LM, assisted by JA, are  
470 responsible for managing the delivery of the trial. JA also leads on the ActivPAL and is responsible for the  
471 implementation of the intervention alongside SO and AF. RM contributed to the planning of this process  
472 evaluation. AFa, GM, CE, CF and DJC are co-investigators who were all involved in the design of the trial  
473 and process evaluation, and attend regular programme meetings where advice is provided where needed.

474 All co-investigators and researchers contributed to the development of the protocol. JFJ drafted the  
1  
475 manuscript which is written on behalf of the RECREATE Programme Management Group. All authors read  
3  
476 and approved the final manuscript.  
5

#### 477 8 **ACKNOWLEDGEMENTS:**

478 We would like to acknowledge the expert support of the RECREATE Programme Management Group who  
10  
479 meet regularly. The group is comprised of: Jennifer Airlie, Karen Birch, Gillian Carter, Bethan Copsey,  
12  
480 Florence Day, Coralie English, Amanda Farrin, Claire Fitzsimons, Anne Forster, Jessica Faye Johansson,  
14  
481 Rebecca Lawton, Laura Marsden, Gillian Mead, Lauren Moreau, Seline Ozer, Anita Patel, Rosie Shannon,  
16  
482 and Nahel Yaziji.  
18

21  
22  
483 **FUNDING STATEMENT:** This work was supported by the National Institute for Health and Care  
24  
484 Research (NIHR) under its Programme Grants for Applied Research Programme, grant number RP-PG-  
26  
485 0615-20019). The views expressed are those of the author(s) and not necessarily those of the NIHR or the  
28  
486 Department of Health and Social Care. The Funder has had no role in trial design, beyond setting the  
30  
487 research question the trial addresses. Data collection, management, analysis and interpretation will remain  
32  
488 independent of the Funder.  
34

35  
36  
489 **SPONSOR:** The trial sponsor is Bradford Teaching Hospitals NHS Foundation Trust, Research  
37  
490 Management & Support Office, Bradford Institute for Health Research, Bradford, BD9 6RJ, United  
38  
491 Kingdom. Tel: +44 (0)1274 38 2575; e-mail: [jane.dennison@bthft.nhs.uk](mailto:jane.dennison@bthft.nhs.uk). The Sponsor will maintain  
40  
492 oversight of trial processes, but is not involved in trial design or delivery processes. The Sponsor will not  
42  
493 participate in data analysis or trial reporting processes.  
44  
494  
46  
47  
495

49  
496 **Data sharing statement:** The data generated from this process evaluation will be maintained by the  
51  
497 Academic Unit of Ageing and Stroke Research. Any requests for data should be sent to corresponding  
53  
498 author Dr Johansson and would be subject to review with the CI Professor Forster. All data-sharing  
55  
499 activities would require a data-sharing agreement.  
57  
500  
59  
60



**COMPETING INTERESTS STATEMENT:**

AF, AFa, CE, CF, GM and DJC are coinvestigators on the grant funding this work therefore are partially supported by the National Institute for Health and Social Care Research (NIHR) (grant number RP-PG-0615-20019).

AF has received additional research grant support from NIHR through the following funding streams: Senior Investigator award, Health Technology Assessment (HTA) and Health and Social Care Delivery Research (HS&DR). AF has previously received support from the Stroke Association to attend the UK stroke forum and received payment from the National Institute for Health (USA) for panel membership (2021, 2022). AF is currently the chair / a member of programme steering committees for NIHR research programmes (Grant reference numbers: NIHR 202339, NIHR 202020) and has served on the following panels: NIHR Doctoral Fellowships, NIHR senior investigators committee (2019/20), NIHR HS&DR committee (2016-2018) and Stroke Association Funding.

CE has received grant funding from the Netherlands Organisation for Scientific Research (NOW) Taskforce for Applied Research (SIA RAAK) for work in a similar area (i.e. sitting less and moving more after stroke) and is a Non-executive Director representing interests of Research and Chair of Research Advisory Committee for the Stroke Foundation of Australia (unpaid).

CF is a coinvestigator / collaborator on other grants on the topic of sedentary behaviour / physical activity and is therefore partially supported by grant funding received from the University of Edinburgh and the Irish Health Board. CE has previously been supported to conduct work in a similar area by grant funding received from the Chief Scientist Office of the Scottish Government, Medical Research Council (MRC) Public Health Intervention Development (PHIND) award and the University of Edinburgh.

JFJ, LM, RS, RM, JA, SO and DJC report no competing interests related to the manuscript.

**Twitter:** @RECREATE\_stroke

## References

1. Tremblay MS, Aubert S, Barnes JD, Saunders TJ, Carson V, Latimer-Cheung AE, et al. Sedentary behavior research network (SBRN)—terminology consensus project process and outcome. *International journal of behavioral nutrition and physical activity*. 2017;14:1-17.
2. Owen N, Sugiyama T, Eakin EE, Gardiner PA, Tremblay MS, Sallis JF. Adults' sedentary behavior: determinants and interventions. *American journal of preventive medicine*. 2011;41(2):189-96.
3. Rezende LFMd, Rodrigues Lopes M, Rey-López JP, Matsudo VKR, Luiz OdC. Sedentary behavior and health outcomes: an overview of systematic reviews. *PloS one*. 2014;9(8):e105620.
4. Tremblay MS, Colley RC, Saunders TJ, Healy GN, Owen N. Physiological and health implications of a sedentary lifestyle. *Applied physiology, nutrition, and metabolism*. 2010;35(6):725-40.
5. Dempsey PC, Biddle SJH, Buman MP, Chastin S, Ekelund U, Friedenreich CM, et al. New global guidelines on sedentary behaviour and health for adults: broadening the behavioural targets. *International Journal of Behavioral Nutrition and Physical Activity*. 2020;17(1):151.
6. Health UDo, Services H. Physical activity guidelines advisory committee. 2018 physical activity guidelines advisory committee scientific report. Published online. 2018.
7. Butler EN, Evenson KR. Prevalence of physical activity and sedentary behavior among stroke survivors in the United States. *Topics in stroke rehabilitation*. 2014;21(3):246-55.
8. English C, Healy GN, Coates A, Lewis L, Olds T, Bernhardt J. Sitting and activity time in people with stroke. *Physical therapy*. 2016;96(2):193-201.
9. Paul L, Brewster S, Wyke S, Gill JM, Alexander G, Dybus A, et al. Physical activity profiles and sedentary behaviour in people following stroke: a cross-sectional study. *Disability and rehabilitation*. 2016;38(4):362-7.
10. English C, Healy GN, Coates A, Lewis LK, Olds T, Bernhardt J. Sitting time and physical activity after stroke: physical ability is only part of the story. *Topics in stroke rehabilitation*. 2016;23(1):36-42.
11. English C, Manns PJ, Tucak C, Bernhardt J. Physical activity and sedentary behaviors in people with stroke living in the community: a systematic review. *Physical therapy*. 2014;94(2):185-96.
12. Tiegies Z, Mead G, Allerhand M, Duncan F, Van Wijck F, Fitzsimons C, et al. Sedentary behavior in the first year after stroke: a longitudinal cohort study with objective measures. *Archives of physical medicine and rehabilitation*. 2015;96(1):15-23.
13. Morton S, Fitzsimons C, Hall J, Clarke D, Forster A, English C, et al. Sedentary behavior after stroke: A new target for therapeutic intervention. SAGE Publications Sage UK: London, England; 2019.
14. Walker MF, Hoffmann TC, Brady MC, Dean CM, Eng JJ, Farrin AJ, et al. Improving the development, monitoring and reporting of stroke rehabilitation research: Consensus-based core recommendations from the Stroke Recovery and Rehabilitation Roundtable. *International Journal of Stroke*. 2017;12(5):472-9.
15. Skivington K, Matthews L, Simpson SA, Craig P, Baird J, Blazeby JM, et al. A new framework for developing and evaluating complex interventions: update of Medical Research Council guidance. *bmj*. 2021;374.
16. Voorberg WH, Bekkers VJ, Tummers LG. A systematic review of co-creation and co-production: Embarking on the social innovation journey. *Public management review*. 2015;17(9):1333-57.
17. Cane J, O'Connor D, Michie S. Validation of the theoretical domains framework for use in behaviour change and implementation research. *Implementation Science*. 2012;7(1):37.
18. Hall J, Morton S, Hall J, Clarke DJ, Fitzsimons CF, English C, et al. A co-production approach guided by the behaviour change wheel to develop an intervention for reducing sedentary behaviour after stroke. *Pilot and feasibility studies*. 2020;6(1):1-13.
19. Hoffmann TC, Glasziou PP, Boutron I, Milne R, Perera R, Moher D, et al. Better reporting of interventions: template for intervention description and replication (TIDieR) checklist and guide. *Bmj*. 2014;348.
20. Moore GF, Evans RE, Hawkins J, Littlecott H, Melendez-Torres G, Bonell C, et al. From complex social interventions to interventions in complex social systems: future directions and unresolved questions for intervention development and evaluation. *Evaluation*. 2019;25(1):23-45.
21. Moore GF, Audrey S, Barker M, Bond L, Bonell C, Hardeman W, et al. Process evaluation of complex interventions: Medical Research Council guidance. *bmj*. 2015;350.
22. May C, Finch T, Rapley T. Normalization process theory. *Handbook on Implementation Science*: Edward Elgar Publishing; 2020.

- 583 23. Sekhon M, Cartwright M, Francis JJ. Acceptability of healthcare interventions: an overview of  
584 reviews and development of a theoretical framework. BMC health services research. 2017;17(1):1-13.  
585 24. Spradley JP. Participant observation: Waveland Press; 2016.  
586 25. Clarke V, Braun V. Thematic analysis. Encyclopedia of critical psychology: Springer; 2014. p. 1947-  
587 52.  
588 26. Ritchie J, Lewis J, Nicholls CM, Ormston R. Qualitative research practice: A guide for social science  
589 students and researchers: sage; 2013.

8  
9  
10  
11  
12  
13  
14  
15  
16  
17  
18  
19  
20  
21  
22  
23  
24  
25  
26  
27  
28  
29  
30  
31  
32  
33  
34  
35  
36  
37  
38  
39  
40  
41  
42  
43  
44  
45  
46  
47  
48  
49  
50  
51  
52  
53  
54  
55  
56  
57  
58  
59  
60

For peer review only

Figure 1: Process Evaluation Flowchart

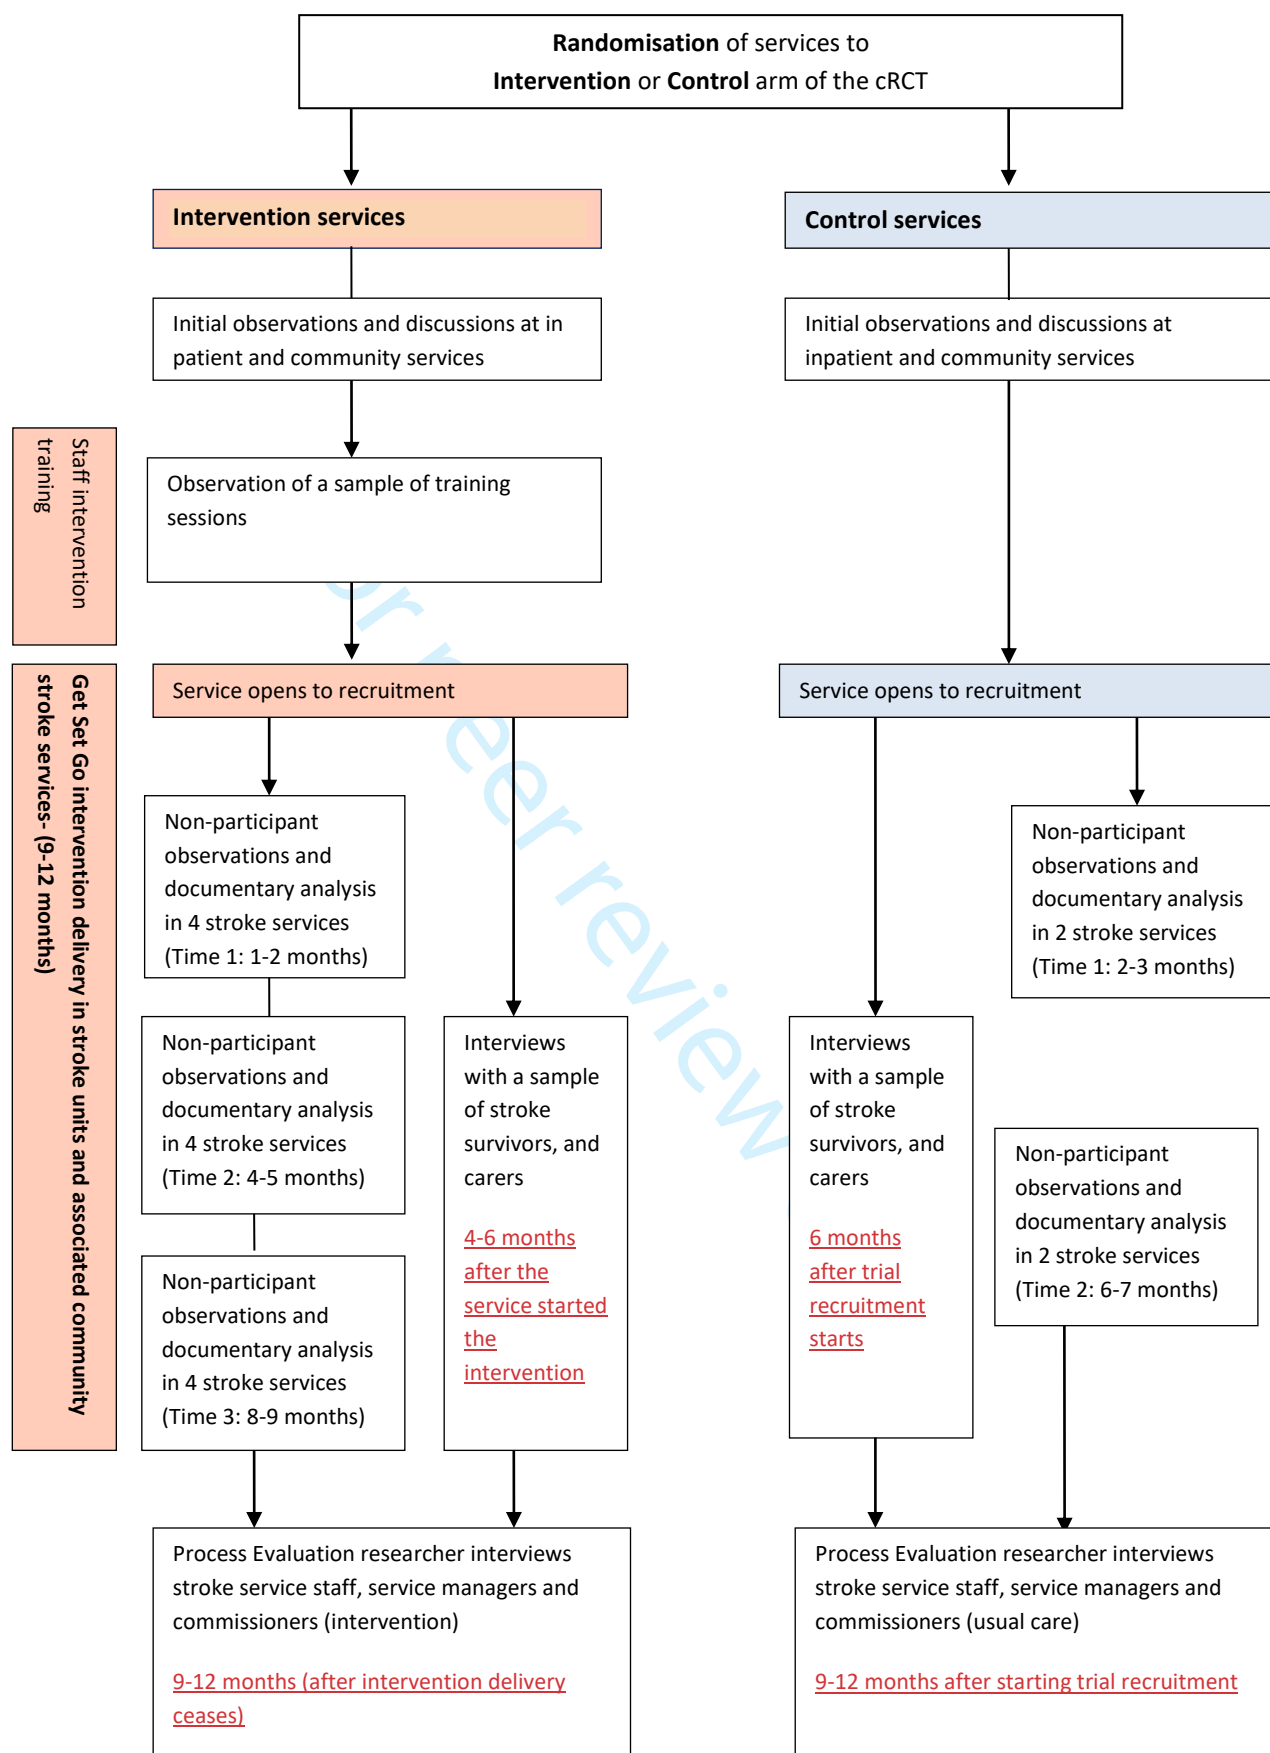

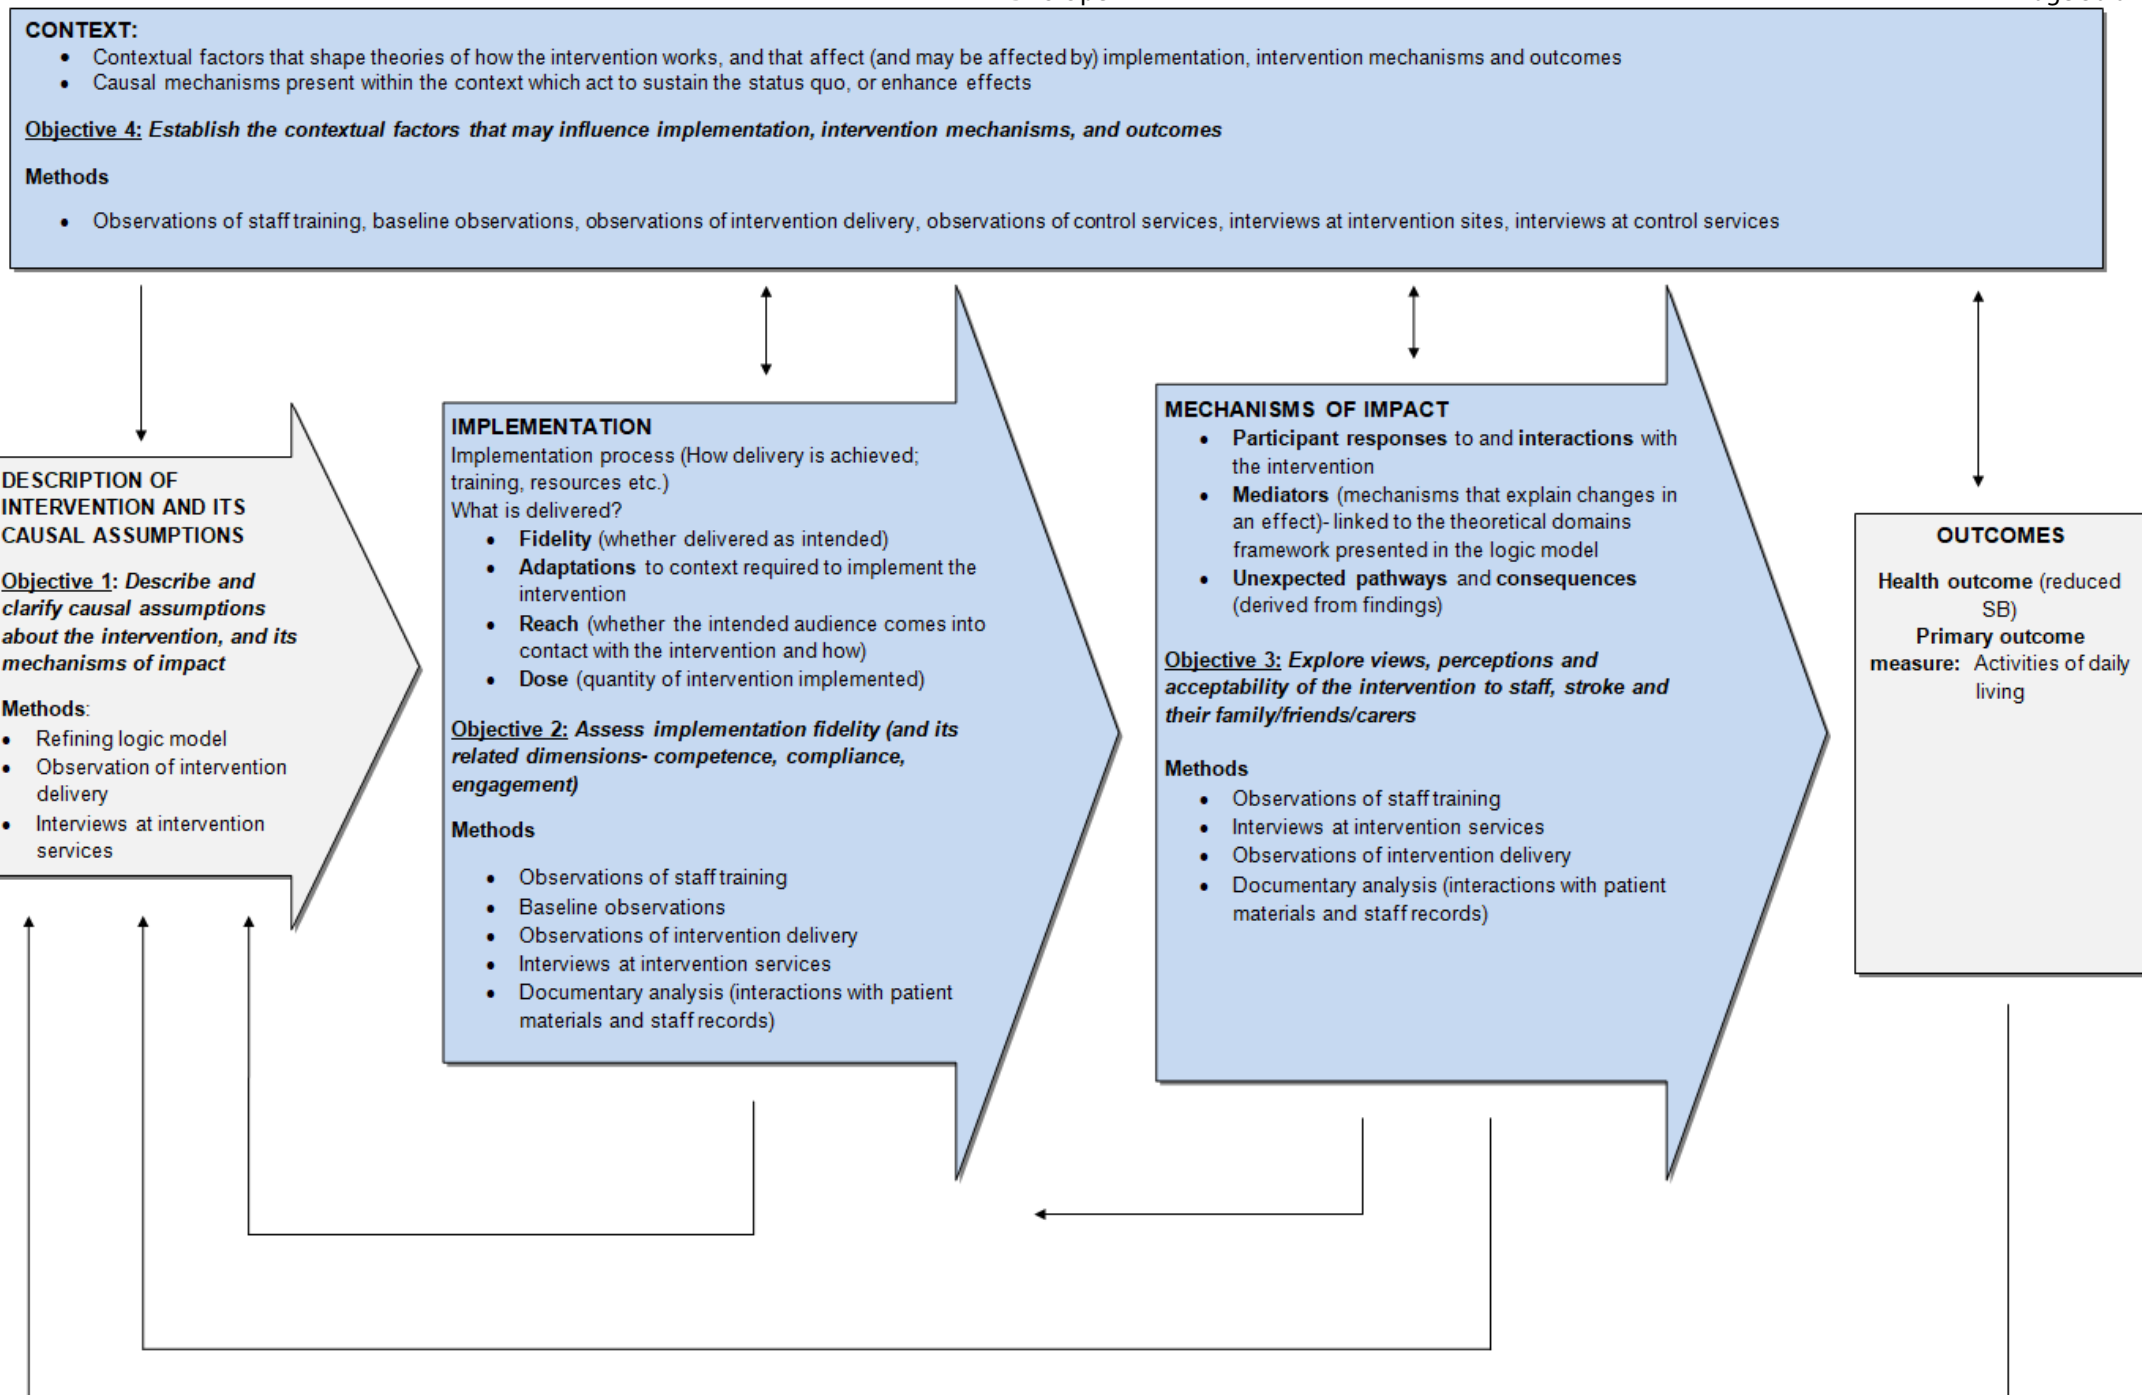

Figure 2: Process evaluation objectives and methods mapped to the MRC guidance by Moore et al., 2015

## Supplementary file 1: Topic guides (staff and patients) for intervention and control sites

### 1. Topic guide for staff - intervention

The purpose of this interview is to hear about your experiences with Get Set Go.

|                                                                                                                                                                                                                                                                                                                                                                                                                                                                                                                                                                                                                                                                                                                                                                                                 |                                                                                                                                                                                   |
|-------------------------------------------------------------------------------------------------------------------------------------------------------------------------------------------------------------------------------------------------------------------------------------------------------------------------------------------------------------------------------------------------------------------------------------------------------------------------------------------------------------------------------------------------------------------------------------------------------------------------------------------------------------------------------------------------------------------------------------------------------------------------------------------------|-----------------------------------------------------------------------------------------------------------------------------------------------------------------------------------|
|                                                                                                                                                                                                                                                                                                                                                                                                                                                                                                                                                                                                                                                                                                                                                                                                 | NPT/TDF/<br>Sekhon                                                                                                                                                                |
| <b>1. What is your usual role?</b>                                                                                                                                                                                                                                                                                                                                                                                                                                                                                                                                                                                                                                                                                                                                                              |                                                                                                                                                                                   |
| <ul style="list-style-type: none"> <li>○ Tell me briefly about your role in the stroke service?</li> <li>○ How long have you been working in stroke care?</li> <li>○ Does Get Set Go fit with your usual role?</li> </ul>                                                                                                                                                                                                                                                                                                                                                                                                                                                                                                                                                                       | n/a:<br>contextual<br>information                                                                                                                                                 |
| <b>2. Tell me about how you got involved in Get Set Go?</b>                                                                                                                                                                                                                                                                                                                                                                                                                                                                                                                                                                                                                                                                                                                                     |                                                                                                                                                                                   |
| <ul style="list-style-type: none"> <li>○ How did your involvement in Get Set Go begin? Attend training or discuss with colleagues?</li> <li>○ How was the training? What do you remember about it?</li> <li>○ Was the format OK (in person/ online)?</li> <li>○ Was it applicable to you and your role? Did it change anything for you?</li> <li>○ What do you understand about the purpose of Get Set Go?</li> <li>○ How does Get Set Go differ from the usual care you provide?</li> <li>○ Was it clear from the training what you needed to do yourself and as a team?</li> <li>○ Did you have any questions/concerns in the beginning? Did you feel ready/confident to deliver the intervention?</li> <li>○ Did anything help you make sense of Get Set Go before delivering it?</li> </ul> | <b>Sekhon:</b><br>Affective<br>attitude,<br>ethicality,<br><br>intervention<br>coherence, self-<br>efficacy<br><br><b>NPT:</b><br>Differentiation,<br>individual<br>specification |
| <b>3. How was Get Set Go used on your ward?</b>                                                                                                                                                                                                                                                                                                                                                                                                                                                                                                                                                                                                                                                                                                                                                 |                                                                                                                                                                                   |
| <ul style="list-style-type: none"> <li>○ Did your team deliver all the intervention components? (go through each).</li> <li>○ Do you feel your team have a good understand of Get Set Go and their roles?</li> <li>○ What did you do as a team to ensure a shared understanding of what you want to achieve?</li> <li>○ Overall, which parts worked well / not so well?</li> <li>○ To what extent do you feel your team value Get Set Go?</li> <li>○ Who is responsible for leading/driving Get Set Go forward? Who else was involved?</li> </ul>                                                                                                                                                                                                                                               | <b>Sekhon:</b><br>Intervention<br>coherence<br><br><b>NPT:</b> Communal<br>specification ,<br>initiation,<br>enrolment,<br>legitimation                                           |
| <b>4. Tell me about your experience of using Get Set Go?</b>                                                                                                                                                                                                                                                                                                                                                                                                                                                                                                                                                                                                                                                                                                                                    |                                                                                                                                                                                   |
| <ul style="list-style-type: none"> <li>○ What was your role or involvement with Get Set Go?</li> <li>○ Tell me about your experiences of using each of the intervention components.</li> <li>○ What parts were the easiest or hardest to use?</li> <li>○ Did you feel able to help patients understand the purpose and what they needed to do?</li> <li>○ Were you aware of/ did you use the website?</li> </ul>                                                                                                                                                                                                                                                                                                                                                                                | <b>Sekhon:</b><br><br>Affective<br>attitude, self-<br>efficacy                                                                                                                    |
| <u>Champions:</u> Can you describe your experiences of being a lead for Get Set Go?                                                                                                                                                                                                                                                                                                                                                                                                                                                                                                                                                                                                                                                                                                             |                                                                                                                                                                                   |

|                                                                                                                                                                                                                                                                                                                                                                                                                                                                                                                                                                                                                                                                                                                                                                                                                                                                                                                                                                                                                                                                                                      |                                                                                                                                                                                                  |
|------------------------------------------------------------------------------------------------------------------------------------------------------------------------------------------------------------------------------------------------------------------------------------------------------------------------------------------------------------------------------------------------------------------------------------------------------------------------------------------------------------------------------------------------------------------------------------------------------------------------------------------------------------------------------------------------------------------------------------------------------------------------------------------------------------------------------------------------------------------------------------------------------------------------------------------------------------------------------------------------------------------------------------------------------------------------------------------------------|--------------------------------------------------------------------------------------------------------------------------------------------------------------------------------------------------|
| <p>(Was your role clear? Did you have enough support? What was difficult or negative? What went well or was enjoyable? Did you feel suggestions were acted upon?)</p> <p><u>Trainers:</u> Can you describe your experiences of delivering the training? How was it received? What were the challenges? Did you feel prepared?</p>                                                                                                                                                                                                                                                                                                                                                                                                                                                                                                                                                                                                                                                                                                                                                                    |                                                                                                                                                                                                  |
| <p><b>5. Has Get Set Go helped patients? (has it increased standing and moving)</b></p>                                                                                                                                                                                                                                                                                                                                                                                                                                                                                                                                                                                                                                                                                                                                                                                                                                                                                                                                                                                                              |                                                                                                                                                                                                  |
| <ul style="list-style-type: none"> <li>○ What are your views on encouraging patients to stand and move more (e.g. benefits, values placed on this)</li> <li>○ Have patients/ family benefited from Get Set Go? Did it change anything for them? (e.g. prompting standing &amp; moving, health, skills, confidence, mood, motivation, empowerment)</li> <li>○ What do patients/families think of the recommendations about how much they should stand and move?</li> <li>○ How do patients respond to the information guide? Where do you think they use it most? (hospital or home)</li> <li>○ Do they understand the purpose? Are they willing to engage?</li> <li>○ Is there anything they particularly like or dislike?</li> </ul>                                                                                                                                                                                                                                                                                                                                                                | <p><b>Sekhon:</b></p> <p>Perceived effectiveness</p><br><p><b>NPT:</b></p> <p>Internalization</p>                                                                                                |
| <p><b>6. Has Get Set Go changed anything for staff/service?</b></p>                                                                                                                                                                                                                                                                                                                                                                                                                                                                                                                                                                                                                                                                                                                                                                                                                                                                                                                                                                                                                                  |                                                                                                                                                                                                  |
| <ul style="list-style-type: none"> <li>○ Overall, what have been the positives of using Get Set Go? (what went well)</li> <li>○ Overall, what have been the negatives of using Get Set Go? (what went not so well)</li> <li>○ Has it changed the way staff work? Has increased standing and moving become habit?</li> <li>○ Has it changed the way staff think about sedentary behaviour/standing and moving? (e.g. knowledge, skills confidence, role, routines, risk)</li> <li>○ Have there been any environmental changes? (e.g. posters, decluttering, influences on standing and moving)</li> <li>○ Did anyone introduce new ideas? How were these received? Did you share ideas/learning?</li> </ul>                                                                                                                                                                                                                                                                                                                                                                                           | <p><b>Sekhon:</b></p> <p>Affective attitude, perceived effectiveness</p>                                                                                                                         |
| <p><b>7. What were the challenges or things that helped?</b></p>                                                                                                                                                                                                                                                                                                                                                                                                                                                                                                                                                                                                                                                                                                                                                                                                                                                                                                                                                                                                                                     |                                                                                                                                                                                                  |
| <ul style="list-style-type: none"> <li>○ What made it difficult/easier to use Get Set Go or to amend practice?</li> <li>○ Was the delivery sustained over time? (what factors influenced this) (e.g. priorities, workload, cost, space, training, resource, patient ability/willingness, risk, skills/confidence, perceived patient benefit, clear understanding)</li> <li>○ How was Get Set Go received by the team/service?</li> <li>○ Was there sufficient time / staff availability?</li> <li>○ Was there sufficient senior / wider team support?</li> <li>○ Was there sufficient communication between services?</li> <li>○ Were there any unplanned events which affected Get Set Go? (e.g. infection, staffing, crises)</li> <li>○ Would greater involvement of different staff groups have helped?</li> <li>○ Did everyone know who was responsible for doing what? How did you allocate roles?</li> <li>○ Did Get Set Go fit into usual routines / roles, or was it too separate?</li> <li>○ How did you prepare practically for delivering Get Set Go? (managing resources etc)</li> </ul> | <p><b>Sekhon:</b></p> <p>Burden, opportunity costs</p><br><p><b>NPT:</b></p> <p>Activation, interactional workability, relational integration, skill set workability, contextual integration</p> |
| <p><b>8. What could we have done better?</b></p>                                                                                                                                                                                                                                                                                                                                                                                                                                                                                                                                                                                                                                                                                                                                                                                                                                                                                                                                                                                                                                                     |                                                                                                                                                                                                  |
| <ul style="list-style-type: none"> <li>○ Do you have any other feedback or suggested changes?</li> <li>○ Most and least valued parts?</li> </ul>                                                                                                                                                                                                                                                                                                                                                                                                                                                                                                                                                                                                                                                                                                                                                                                                                                                                                                                                                     | <p><b>Sekhon:</b></p>                                                                                                                                                                            |

|                   |                                                                                                                                                                                                                                                                     |                                             |
|-------------------|---------------------------------------------------------------------------------------------------------------------------------------------------------------------------------------------------------------------------------------------------------------------|---------------------------------------------|
| 1<br>2<br>3<br>4  | <ul style="list-style-type: none"> <li>○ What could we have done to help you use GSG? What would you do differently next time?</li> <li>○ Does Get Set Go meet its purpose to help stroke survivors recover?</li> </ul>                                             | Affective attitude, perceived effectiveness |
| 5<br>6            | <b>9. The impacts of the COVID pandemic</b>                                                                                                                                                                                                                         |                                             |
| 7<br>8<br>9<br>10 | <ul style="list-style-type: none"> <li>○ Has the COVID pandemic influenced your engagement with the Get Set Go intervention?</li> <li>○ Has the COVID pandemic had an influence on how much you have been able to support/encourage standing and moving?</li> </ul> |                                             |
| 11<br>12<br>13    | <b>10. Is there anything else you would like to ask or mention?</b>                                                                                                                                                                                                 |                                             |

## 2. Topic guide for staff control

This topic guide is to gain insights into staff's perceptions and views related to the provision of usual care to stroke survivors- related to standing and moving/mobilising after stroke.

|                                                                                                                                                                                                                                                                                                                                                                                                                                                                                                                                                                                                                                                                                                                         |  |                                                                           |
|-------------------------------------------------------------------------------------------------------------------------------------------------------------------------------------------------------------------------------------------------------------------------------------------------------------------------------------------------------------------------------------------------------------------------------------------------------------------------------------------------------------------------------------------------------------------------------------------------------------------------------------------------------------------------------------------------------------------------|--|---------------------------------------------------------------------------|
|                                                                                                                                                                                                                                                                                                                                                                                                                                                                                                                                                                                                                                                                                                                         |  | NPT/TDF/<br>Sekhon                                                        |
| <b>1. What is your role?</b>                                                                                                                                                                                                                                                                                                                                                                                                                                                                                                                                                                                                                                                                                            |  |                                                                           |
| - Tell me briefly about your role in the stroke service?<br>- How long have you been working in stroke care?                                                                                                                                                                                                                                                                                                                                                                                                                                                                                                                                                                                                            |  | n/a<br>contextual<br>information                                          |
| <b>2. Perceptions/ thoughts about standing and moving?</b>                                                                                                                                                                                                                                                                                                                                                                                                                                                                                                                                                                                                                                                              |  |                                                                           |
| - What do you think about encouraging patients to stand and move more? (including benefits, how much this is valued)<br>- What sort of time in their care pathway do you think it is most important? (Throughout/inpatient/community).<br>- What do you think it is beneficial for patients to know about standing and moving?                                                                                                                                                                                                                                                                                                                                                                                          |  | <b>Sekhon:</b><br>Affective attitude, ethicality, perceived effectiveness |
| <b>3. Experiences of supporting standing and moving more? (Individual and as a team)</b>                                                                                                                                                                                                                                                                                                                                                                                                                                                                                                                                                                                                                                |  |                                                                           |
| - To what extent does your role involve supporting patients to stand and move?<br>- Tell me about your experiences of supporting standing and moving? (as an individual/team- how this is managed at a ward/community service level)<br>- Is this something that is routinely encouraged?<br>- Which staff are most commonly responsible for encouraging/supporting standing and moving?<br>- Are you/ your team aware of any specific initiatives/ tools to support practices related to standing and moving?<br>- To what extent do you feel adequately equipped to support patients to stand and move?                                                                                                               |  | <b>Sekhon:</b><br>Self-efficacy                                           |
| <b>4. Challenges or things that help supporting standing and moving?</b>                                                                                                                                                                                                                                                                                                                                                                                                                                                                                                                                                                                                                                                |  |                                                                           |
| - What is your view on your team's willingness/ability/capability to support standing and moving?<br>- What is your view on the patient/carer's willingness/ability to practice standing and moving?<br>- What responses have you had from patients and their carers?<br>- Are there any factors that influence whether you would encourage patients to stand and move more? (e.g. priorities, staffing, workload, cost, space, training, resource specific processes, leadership patient ability/willingness, risk, skills/confidence, perceived patient benefit, clear understanding, environment)?<br>- Any other particular things that work particularly well or not so well that might affect standing and moving |  | <b>Sekhon:</b><br>Burden, opportunity costs                               |



|                                                                                                                                                                                                              |  |
|--------------------------------------------------------------------------------------------------------------------------------------------------------------------------------------------------------------|--|
| <b>5. Could anything be better?</b>                                                                                                                                                                          |  |
| <ul style="list-style-type: none"> <li>○ Could you or your team do anything more to support/encourage patients to stand or move more?</li> <li>○ How could current practice be further developed?</li> </ul> |  |
| <b>6. The impacts of the COVID pandemic</b>                                                                                                                                                                  |  |
| - Has the COVID pandemic had an influence on how much you have been able to support/encourage standing and moving?                                                                                           |  |
| <b>7. Is there anything else that you would like to ask or mention?</b>                                                                                                                                      |  |

**3. Topic guide for stroke survivors and carers – intervention**

*\*All questions are for stroke survivor and/or carer, except where "(C)" marks them as for carer only.*

|                                                                                                                                                                                                                                                                                                                                                                                                                                                                                                                                                                                                                                                                                                                                                                                                                                                                                                                                                                                                                                         | NPT/TDF/<br>Sekhon                                                                                                                                                |
|-----------------------------------------------------------------------------------------------------------------------------------------------------------------------------------------------------------------------------------------------------------------------------------------------------------------------------------------------------------------------------------------------------------------------------------------------------------------------------------------------------------------------------------------------------------------------------------------------------------------------------------------------------------------------------------------------------------------------------------------------------------------------------------------------------------------------------------------------------------------------------------------------------------------------------------------------------------------------------------------------------------------------------------------|-------------------------------------------------------------------------------------------------------------------------------------------------------------------|
| <b>1. You &amp; your stroke</b>                                                                                                                                                                                                                                                                                                                                                                                                                                                                                                                                                                                                                                                                                                                                                                                                                                                                                                                                                                                                         |                                                                                                                                                                   |
| - Could you tell me a bit about you? (Hobbies, interests pre and post stroke?)<br>- What were the impacts of your stroke? (symptoms, usual activities, changes over time)<br>- How long has it been since you had your stroke?<br>- How long did you spend in hospital?<br>- Could you describe your experiences of your hospital stroke care? (positives/negatives)<br>- Could you describe your experiences of the stroke care you received since coming home? (positives/negatives, waiting, still receiving, how long)<br>- Have you experienced any other difficulties alongside your stroke that required additional care?                                                                                                                                                                                                                                                                                                                                                                                                        | n/a contextual information                                                                                                                                        |
| <b>2. What are you experiences and thoughts about standing and moving more?</b>                                                                                                                                                                                                                                                                                                                                                                                                                                                                                                                                                                                                                                                                                                                                                                                                                                                                                                                                                         |                                                                                                                                                                   |
| - How much standing and moving do you do at the moment? Tell me about your daily routines? (types of activities where might be standing and moving, times of day when more likely)<br>- (C) Do you play a role in supporting standing and moving? (if yes, explore how)<br>- What do you think about trying to/encouraging stand and move more after stroke? (benefits, fears, in hospital, at home, is this valued)<br>- Do you feel confident/capable to stand and move/encourage standing and moving?<br>- At what time after stroke do you think it's most important? (throughout/inpatient/community)<br>- Have you received any support or tools for standing and moving? (e.g. groups, therapy)                                                                                                                                                                                                                                                                                                                                  | <b>Sekhon:</b><br>Affective attitude, ethicality, perceived effectiveness, self-efficacy<br><br><b>NPT:</b><br>n/a                                                |
| <b>3. What are your experiences of Get Set Go? (show examples of the intervention components)</b>                                                                                                                                                                                                                                                                                                                                                                                                                                                                                                                                                                                                                                                                                                                                                                                                                                                                                                                                       |                                                                                                                                                                   |
| - Did <b>staff talk to you</b> about/ prompting standing and moving more (in hospital or at home)? <ul style="list-style-type: none"> <li>• Who was it? Were family/friends involved?</li> <li>• How did you feel about it?</li> <li>• Did it make sense? Did you have any questions? Did they give examples of what to do/when?</li> </ul> - In hospital, did you receive an information guide or see anything about GSG on the ward? - What do you think about this? Was it appropriate for you?<br>- Did staff regularly update the recommendations about standing and moving?<br>- Did you record your standing and moving? (reasons why not if not) Will you keep recording?<br>- What did you think of the GSG materials? Were they useful? <i>[this section includes a breakdown of all intervention components not listed for publication purposes]</i><br>- How could the above materials be improved? (format, content, ease of use, social acceptability)<br>- Have you received any follow up contact since returning home? | <b>Sekhon:</b><br>Intervention coherence, Affective attitude, Perceived effectiveness, Self- efficacy, Ethicality<br><br><b>NPT:</b><br>Interactional workability |
| <b>4. Has Get Set Go helped you? (has it increased standing and moving)</b>                                                                                                                                                                                                                                                                                                                                                                                                                                                                                                                                                                                                                                                                                                                                                                                                                                                                                                                                                             |                                                                                                                                                                   |

|                                                                                                                                                                                                                                                                                                                                                                                                                                                                                                                                                                                                                                                                                                                                                                                                                                                                                                                                                                                                                                                                                                                                                                                                                                                                                              |                                                                                                                                                                         |
|----------------------------------------------------------------------------------------------------------------------------------------------------------------------------------------------------------------------------------------------------------------------------------------------------------------------------------------------------------------------------------------------------------------------------------------------------------------------------------------------------------------------------------------------------------------------------------------------------------------------------------------------------------------------------------------------------------------------------------------------------------------------------------------------------------------------------------------------------------------------------------------------------------------------------------------------------------------------------------------------------------------------------------------------------------------------------------------------------------------------------------------------------------------------------------------------------------------------------------------------------------------------------------------------|-------------------------------------------------------------------------------------------------------------------------------------------------------------------------|
| <p>1 - What did you think about GSG overall?</p> <p>2 - Which parts worked well / not so well? Is there anything you particularly like or dislike?</p> <p>3 - Did it make you want to stand and move more? Did you?</p> <p>4 • Did you benefit in any other way?</p> <p>5 • Has it helped or hindered your recovery from stroke? Or influenced your life more broadly?</p> <p>6 • Did it make you do anything differently or change anything? (e.g. Did it affect your:</p> <p>7 motivation, goals, mood, remembering to stand and move, confidence, activities, health,</p> <p>8 conversations)</p> <p>9 • Was your time spent using the guide beneficial?</p> <p>10 • Have you incorporated new activity into your daily life? Do you feel you will maintain it?</p> <p>11 - Have your family and friends used the guide and benefitted, or changed anything as a result?</p> <p>12 - Has engaging with the Get Set Go intervention been worthwhile?</p> <p>13 - Do you think Get Set Go can help other people?</p> <p>14 - Does it help recovery after stroke?</p>                                                                                                                                                                                                                        | <p><b>Sekhon:</b><br/>Burden,<br/>Self-efficacy,<br/>Opportunity<br/>costs,<br/>Affective<br/>attitudes,<br/>Perceived<br/>effectiveness</p> <p><b>NPT:</b><br/>n/a</p> |
| <p>17</p> <p>18 <b>5. What were the challenges or things that helped?</b></p>                                                                                                                                                                                                                                                                                                                                                                                                                                                                                                                                                                                                                                                                                                                                                                                                                                                                                                                                                                                                                                                                                                                                                                                                                |                                                                                                                                                                         |
| <p>19 - Did anything make it difficult to use Get Set Go / to stand and move? (fears, impact of stroke,<br/>20 motivation, unexpected events, confidence, opportunities, environment, forgetting, mood, other<br/>21 responsibilities/ lack of time, not knowing what to do, seeing the benefit, equipment)</p> <p>22 • Is there anything you struggle with/ have concerns/ uncertainties about in terms of Get Set<br/>23 Go/standing and moving?</p> <p>24 • Did you feel confident you could ask for help?</p> <p>25 • Did staff talk to you about GSG (or did it feel like something to do on your own)?</p> <p>26 - Did anything make it easier to use Get Set Go / to stand and move? (staff, family, confidence,<br/>27 opportunities, environment, motivation, mood, timing after stroke, knowing what to do, seeing<br/>28 the benefit, equipment)</p> <p>29 • Did you make any changes to your surroundings to make it easier for you to move around<br/>30 (in hospital or at home)? Was it easy or difficult to make these changes?</p> <p>31 • Is there anything else that could be better to help you use Get Set Go/stand and move<br/>32 more?</p> <p>33 - Has anything else influenced your behaviour/affected your standing and moving alongside the<br/>34 programme?</p> | <p><b>Sekhon:</b><br/>Burden,<br/>Opportunity<br/>costs,<br/>Affective<br/>attitude,<br/>Self-efficacy</p> <p><b>NPT:</b><br/>Interactional<br/>workability</p>         |
| <p>37</p> <p>38</p> <p>39 <b>6. Could anything be better?</b></p>                                                                                                                                                                                                                                                                                                                                                                                                                                                                                                                                                                                                                                                                                                                                                                                                                                                                                                                                                                                                                                                                                                                                                                                                                            |                                                                                                                                                                         |
| <p>40 - Is there anything else you would like to say about your experience / other feedback?</p> <p>41 - What might you do differently next time?</p>                                                                                                                                                                                                                                                                                                                                                                                                                                                                                                                                                                                                                                                                                                                                                                                                                                                                                                                                                                                                                                                                                                                                        | <p><b>Sekhon:</b><br/>Affective attitude</p> <p><b>NPT:</b><br/>n/a</p>                                                                                                 |
| <p>44</p> <p>45 <b>7. The impacts of the COVID pandemic</b></p>                                                                                                                                                                                                                                                                                                                                                                                                                                                                                                                                                                                                                                                                                                                                                                                                                                                                                                                                                                                                                                                                                                                                                                                                                              |                                                                                                                                                                         |
| <p>46 - What impact has the COVID pandemic and the associated restrictions had on your day-to-day life? (health,<br/>47 physical, social, emotional)</p> <p>48 - Could you describe any changes in your activities as a result of the COVID pandemic? (e.g. physical, social, day-<br/>49 to-day- explore if doing any activities less or more)</p> <p>50 - Has the COVID pandemic influenced your standing and moving?</p> <p>51 - Has the COVID pandemic influenced your engagement with the Get Set Go intervention?</p> <p>52 - (C) Has the COVID pandemic had an influence on how much you have been able to support/encourage standing<br/>53 and moving?</p>                                                                                                                                                                                                                                                                                                                                                                                                                                                                                                                                                                                                                          |                                                                                                                                                                         |
| <p>54</p> <p>55</p> <p>56 <b>8. Is there anything else you would like to ask or mention?</b></p> <p>57</p> <p>58</p> <p>59</p> <p>60</p>                                                                                                                                                                                                                                                                                                                                                                                                                                                                                                                                                                                                                                                                                                                                                                                                                                                                                                                                                                                                                                                                                                                                                     |                                                                                                                                                                         |

**4. Topic guide for stroke survivors and carers – control**

\*All questions are for stroke survivor and/or carer, except where “(C)” marks them as for carer only.

|                                                                                                                                                                                                                                                                                                                                                                                                                                                                                                                                                                                                                                                                                                                     | NPT/TDF/<br>Sekhon                                                                       |
|---------------------------------------------------------------------------------------------------------------------------------------------------------------------------------------------------------------------------------------------------------------------------------------------------------------------------------------------------------------------------------------------------------------------------------------------------------------------------------------------------------------------------------------------------------------------------------------------------------------------------------------------------------------------------------------------------------------------|------------------------------------------------------------------------------------------|
| <b>1. About you (stroke survivor)</b>                                                                                                                                                                                                                                                                                                                                                                                                                                                                                                                                                                                                                                                                               |                                                                                          |
| - Could you tell me a bit about you? (Hobbies, interests pre and post stroke?)                                                                                                                                                                                                                                                                                                                                                                                                                                                                                                                                                                                                                                      | n/a contextual information                                                               |
| <b>2. Your stroke (stroke survivor)</b>                                                                                                                                                                                                                                                                                                                                                                                                                                                                                                                                                                                                                                                                             |                                                                                          |
| - How long has it been since you had your stroke?<br>- What were the impacts of your stroke? (symptoms and how they may have changed over time)<br>- How long did you spend in hospital?<br>- Could you describe your experiences of the stroke care you received? (inpatient/community care/any additional support/positives/negatives)<br>- Have you experienced any other difficulties alongside your stroke that have required additional care?                                                                                                                                                                                                                                                                 | n/a contextual information                                                               |
| <b>3. Perceptions/ thoughts about standing and moving? (stroke survivor and carer)</b>                                                                                                                                                                                                                                                                                                                                                                                                                                                                                                                                                                                                                              |                                                                                          |
| - <b>(SS)</b> What do you thinking about trying to stand and move more after stroke? (benefits, fears)<br>- <b>(SS and C)</b> To what extent do you feel confident/capable to stand and move/encourage standing and moving?<br>- <b>(C)</b> What do you think about encouraging people who have had a stroke to stand and move more? (including benefits, how much this is valued)<br>- <b>(SS and C)</b> What sort of time in their care pathway do you think it is most important? (Throughout/inpatient/community).<br>- <b>(SS and C)</b> Do you feel as though you could benefit from learning more about standing and moving after stroke? (what could be helpful?)                                           | <b>Sekhon:</b><br>Affective attitude, ethicality, perceived effectiveness, self-efficacy |
| <b>3. Standing and moving more- your experiences</b>                                                                                                                                                                                                                                                                                                                                                                                                                                                                                                                                                                                                                                                                |                                                                                          |
| - <b>(SS)</b> Could you tell me a little about your day-to-day routines?<br>- <b>(SS)</b> How much standing and moving would you tend to do each day? (discuss types of activities where might be standing and moving, or times of day when more likely)<br>- <b>(C)</b> Do you play a role in supporting standing and moving? (is yes, explore how they provide support)<br>- <b>(SS and C)</b> What do you remember about being encouraged to stand and move in hospital/by community teams?<br><b>(SS and C)</b> Have you received any support about standing and moving (e.g. from therapists, groups).<br>- <b>(SS and C)</b> Are you aware of any specific initiatives/ tools to support standing and moving? |                                                                                          |
| <b>4. Challenges or things that help supporting standing and moving?</b>                                                                                                                                                                                                                                                                                                                                                                                                                                                                                                                                                                                                                                            |                                                                                          |
| - <b>(SS)</b> Tell me about any challenges you may face in standing and moving? (physical, cognitive, fears of falls, confidence, opportunities, environmental factors, motivation)<br>- <b>(C)</b> Tell me about any challenges you may face in supporting standing and moving? (same prompts as above)<br>- <b>(SS and C)</b> Any other particular things that work particularly well or not so well that might affect standing and moving?                                                                                                                                                                                                                                                                       | <b>Sekhon:</b><br>Burden, opportunity costs                                              |
| <b>5. Could anything be better?</b>                                                                                                                                                                                                                                                                                                                                                                                                                                                                                                                                                                                                                                                                                 |                                                                                          |
| - <b>(SS and C)</b> Is there anything that could facilitate standing and moving more?<br><b>(SS)</b> Could you benefit from more support to encourage you to stand and move more?                                                                                                                                                                                                                                                                                                                                                                                                                                                                                                                                   |                                                                                          |

|    |                                                                                               |  |
|----|-----------------------------------------------------------------------------------------------|--|
| 1  |                                                                                               |  |
| 2  | <b>6. The impacts of the COVID pandemic</b>                                                   |  |
| 3  | - What impact has COVID and the associated restrictions had on your day-to-day life? (health, |  |
| 4  | physical, social, emotional)                                                                  |  |
| 5  | - Could you describe any changes in your activities as a result of the COVID pandemic? (e.g.  |  |
| 6  | physical, social, day-to-day- explore if doing any activities less or more)                   |  |
| 7  | - Has the COVID pandemic influenced your standing and moving?                                 |  |
| 8  | - (C) Has the COVID pandemic had an influence on how much you have been able to               |  |
| 9  | support/encourage standing and moving?                                                        |  |
| 10 |                                                                                               |  |
| 11 | <b>7. Is there anything else that you would like to ask or mention?</b>                       |  |
| 12 |                                                                                               |  |
| 13 |                                                                                               |  |
| 14 |                                                                                               |  |
| 15 |                                                                                               |  |
| 16 |                                                                                               |  |
| 17 |                                                                                               |  |
| 18 |                                                                                               |  |
| 19 |                                                                                               |  |
| 20 |                                                                                               |  |
| 21 |                                                                                               |  |
| 22 |                                                                                               |  |
| 23 |                                                                                               |  |
| 24 |                                                                                               |  |
| 25 |                                                                                               |  |
| 26 |                                                                                               |  |
| 27 |                                                                                               |  |
| 28 |                                                                                               |  |
| 29 |                                                                                               |  |
| 30 |                                                                                               |  |
| 31 |                                                                                               |  |
| 32 |                                                                                               |  |
| 33 |                                                                                               |  |
| 34 |                                                                                               |  |
| 35 |                                                                                               |  |
| 36 |                                                                                               |  |
| 37 |                                                                                               |  |
| 38 |                                                                                               |  |
| 39 |                                                                                               |  |
| 40 |                                                                                               |  |
| 41 |                                                                                               |  |
| 42 |                                                                                               |  |
| 43 |                                                                                               |  |
| 44 |                                                                                               |  |
| 45 |                                                                                               |  |
| 46 |                                                                                               |  |
| 47 |                                                                                               |  |
| 48 |                                                                                               |  |
| 49 |                                                                                               |  |
| 50 |                                                                                               |  |
| 51 |                                                                                               |  |
| 52 |                                                                                               |  |
| 53 |                                                                                               |  |
| 54 |                                                                                               |  |
| 55 |                                                                                               |  |
| 56 |                                                                                               |  |
| 57 |                                                                                               |  |
| 58 |                                                                                               |  |
| 59 |                                                                                               |  |
| 60 |                                                                                               |  |

For peer review only

# BMJ Open

## An intervention to reduce sedentary behaviour and improve outcomes after stroke (Get Set Go): A study protocol for the process evaluation of a pilot cluster randomised controlled trial (RECREATE)

|                                 |                                                                                                                                                                                                                                                                                                                                                                                                                                                                                                                                                                                                                                                                                                                                                                                                                                                                                                                                                                                                                                                                                                                                                                                                                                                                                                                                                                                                                                                                                                                                                           |
|---------------------------------|-----------------------------------------------------------------------------------------------------------------------------------------------------------------------------------------------------------------------------------------------------------------------------------------------------------------------------------------------------------------------------------------------------------------------------------------------------------------------------------------------------------------------------------------------------------------------------------------------------------------------------------------------------------------------------------------------------------------------------------------------------------------------------------------------------------------------------------------------------------------------------------------------------------------------------------------------------------------------------------------------------------------------------------------------------------------------------------------------------------------------------------------------------------------------------------------------------------------------------------------------------------------------------------------------------------------------------------------------------------------------------------------------------------------------------------------------------------------------------------------------------------------------------------------------------------|
| Journal:                        | <i>BMJ Open</i>                                                                                                                                                                                                                                                                                                                                                                                                                                                                                                                                                                                                                                                                                                                                                                                                                                                                                                                                                                                                                                                                                                                                                                                                                                                                                                                                                                                                                                                                                                                                           |
| Manuscript ID                   | bmjopen-2023-075363.R2                                                                                                                                                                                                                                                                                                                                                                                                                                                                                                                                                                                                                                                                                                                                                                                                                                                                                                                                                                                                                                                                                                                                                                                                                                                                                                                                                                                                                                                                                                                                    |
| Article Type:                   | Protocol                                                                                                                                                                                                                                                                                                                                                                                                                                                                                                                                                                                                                                                                                                                                                                                                                                                                                                                                                                                                                                                                                                                                                                                                                                                                                                                                                                                                                                                                                                                                                  |
| Date Submitted by the Author:   | 15-Aug-2023                                                                                                                                                                                                                                                                                                                                                                                                                                                                                                                                                                                                                                                                                                                                                                                                                                                                                                                                                                                                                                                                                                                                                                                                                                                                                                                                                                                                                                                                                                                                               |
| Complete List of Authors:       | Johansson, Jessica; University of Leeds, Academic Unit of Ageing and Stroke Research, Leeds Institute of Health Sciences; Bradford Teaching Hospitals NHS Foundation Trust, Academic Unit of Ageing and Stroke Research<br>Shannon, Rosie; Bradford Teaching Hospitals NHS Foundation Trust, Academic Unit of Ageing and Stroke Research<br>Mossabir , Rahena; Bradford Teaching Hospitals NHS Foundation Trust, Academic Unit for Ageing and Stroke Research<br>Airlie, Jennifer; Bradford Teaching Hospitals NHS Foundation Trust, Academic Unit for Ageing and Stroke Research<br>Ozer, Seline; Bradford Teaching Hospitals NHS Foundation Trust, Academic Unit of Ageing and Stroke Research<br>Moreau, Lauren; University of Leeds, Leeds Institute of Clinical Trials Research<br>Farrin, Amanda; University of Leeds, Clinical Trials Research Unit<br>Mead, Gillian; The University of Edinburgh Centre for Clinical Brain Sciences<br>English, Coralie; The University of Newcastle, School of Health Sciences<br>Fitzsimons, Claire F.; University of Edinburgh Physical Activity for Health Research Centre<br>Clarke, David; University of Leeds, Academic Unit of Ageing and Stroke Research ; Bradford Teaching Hospitals NHS Foundation Trust, Academic Unit of Ageing and Stroke Research<br>Forster, Anne; University of Leeds, Academic Unit of Ageing and Stroke Research ; Bradford Teaching Hospitals NHS Foundation Trust, Academic Unit of Ageing and Stroke Research<br>RECREATE Programme, Management Group; University of Leeds |
| <b>Primary Subject Heading</b>: | Rehabilitation medicine                                                                                                                                                                                                                                                                                                                                                                                                                                                                                                                                                                                                                                                                                                                                                                                                                                                                                                                                                                                                                                                                                                                                                                                                                                                                                                                                                                                                                                                                                                                                   |
| Secondary Subject Heading:      | Research methods                                                                                                                                                                                                                                                                                                                                                                                                                                                                                                                                                                                                                                                                                                                                                                                                                                                                                                                                                                                                                                                                                                                                                                                                                                                                                                                                                                                                                                                                                                                                          |
| Keywords:                       | Stroke < NEUROLOGY, PUBLIC HEALTH, QUALITATIVE RESEARCH, Clinical trials < THERAPEUTICS                                                                                                                                                                                                                                                                                                                                                                                                                                                                                                                                                                                                                                                                                                                                                                                                                                                                                                                                                                                                                                                                                                                                                                                                                                                                                                                                                                                                                                                                   |
|                                 |                                                                                                                                                                                                                                                                                                                                                                                                                                                                                                                                                                                                                                                                                                                                                                                                                                                                                                                                                                                                                                                                                                                                                                                                                                                                                                                                                                                                                                                                                                                                                           |

1  
2  
3  
4  
5  
6  
7  
8  
9  
10  
11  
12  
13  
14  
15  
16  
17  
18  
19  
20  
21  
22  
23  
24  
25  
26  
27  
28  
29  
30  
31  
32  
33  
34  
35  
36  
37  
38  
39  
40  
41  
42  
43  
44  
45  
46  
47  
48  
49  
50  
51  
52  
53  
54  
55  
56  
57  
58  
59  
60



1 **An intervention to reduce sedentary behaviour and improve outcomes after**  
2  
3 **stroke (Get Set Go): A study protocol for the process evaluation of a pilot**  
4  
5 **cluster randomised controlled trial (RECREATE)**  
6  
7

8 **AUTHORS:** Jessica Faye Johansson<sup>1,2</sup>, Rosie Shannon<sup>2</sup>, Rahena Mossabir<sup>2</sup>, Jennifer Airlie<sup>2</sup>, Seline  
9  
10 Ozer<sup>2</sup>, Lauren Moreau<sup>3</sup>, Amanda Farrin<sup>3</sup>, Gillian Mead<sup>4</sup>, Coralie English<sup>5,6</sup>, Claire Fitzsimons<sup>7</sup>, David J.  
11  
12 Clarke<sup>1,2</sup>, Anne Forster<sup>1,2</sup> on behalf of the RECREATE Programme Management Group  
13  
14

15 Corresponding author: Dr Jessica Faye Johansson<sup>1,2</sup> : [Jessica.johansson@bthft.nhs.uk](mailto:Jessica.johansson@bthft.nhs.uk)  
16  
17

18 <sup>1</sup> University of Leeds, Leeds Institute of Health Sciences, Academic Unit for Ageing and Stroke Research,  
19  
20 UK  
21

22 <sup>2</sup> Bradford Institute for Health Research, Academic Unit of Ageing and Stroke Research, UK  
23

24 <sup>3</sup> Clinical Trials Research Unit, Leeds Institute of Clinical Trials Research, University of Leeds, UK  
25

26 <sup>4</sup> Centre for Clinical Brain Sciences, University of Edinburgh, Edinburgh, UK.  
27

28 <sup>5</sup> School of Health Sciences University of Newcastle, Newcastle, Australia.  
29

30 <sup>6</sup> Heart and Stroke Research Program, Hunter Medical Research Institute, Newcastle, Australia.  
31

32 <sup>7</sup> Physical Activity for Health Research Centre, University of Edinburgh, Edinburgh, UK  
33  
34

35  
36  
37 Word count : 4773  
38

39 Abstract word count 294  
40

41  
42 **ABSTRACT:**  
43

44  
45 **Introduction:** Stroke survivors spend long periods of time engaging in sedentary behaviour even when their  
46  
47 functional recovery is good. In the RECREATE programme, an intervention aimed at reducing sedentary  
48  
49 behaviour ('Get Set Go') will be implemented and evaluated in a pragmatic external pilot cluster randomised  
50  
51 controlled trial (cRCT) with embedded process and economic evaluations. We report the protocol for the  
52  
53 process evaluation which will address the following objectives: 1) Describe and clarify causal assumptions  
54  
55 about the intervention, and its mechanisms of impact; 2) Assess implementation fidelity; 3) Explore views,  
56  
57  
58  
59  
60

perceptions and acceptability of the intervention to staff, stroke survivors and their carers; 4) Establish the contextual factors that influence implementation, intervention mechanisms, and outcomes.

**Methods and analysis:** This pilot trial will be conducted in 15 UK based National Health Service (NHS) stroke services. This process evaluation study, underpinned by the Medical Research Council (MRC) guidance will be undertaken in six of the randomised services (four intervention, two control). Data collection includes: observations of staff training sessions, non- participant observations in inpatient and community settings, semi-structured interviews with staff, patients and carers, and documentary analysis of key intervention components. Additional quantitative implementation data will be collected in all sites. Training observations and documentary analysis data will be summarised, with other observational and interview data analysed using Thematic Analysis. Relevant theories will be used to interpret the findings, including: the Theoretical Domains Framework, Normalisation Process Theory and the Theoretical Framework of Acceptability. Anticipated outputs include: recommendations for intervention refinements (both content and implementation); a revised implementation plan, and a refined logic model.

**Ethics and dissemination:** The study was approved by Yorkshire & The Humber - Bradford Leeds Research Ethics Committee (REC reference:19/YH/0403). Findings will be disseminated via peer review publications, and national and international conference presentations.

**Trial registration number:** ISRCTN82280581

## STRENGTHS AND LIMITATIONS OF THE STUDY:

- The process evaluation is underpinned by the Medical Research Council (MRC) guidance for process evaluations and addresses all key functions outlined in the guidance including implementation, mechanisms of impact and context.
- Theory based, comprehensive process evaluation involving staff, patients and family, friends and carers in intervention and control services.
- The process evaluation will be conducted longitudinally, providing information about changes over time.
- The in-depth process evaluation will be conducted in a proportion of trial services, however the implementation team will meet regularly with services not included in the process evaluation to



54 provide an insight into implementation activity. We will also report quantitative implementation data  
1 collected across all sites.  
2  
3  
4

## 5 INTRODUCTION 6

7  
8 Sedentary behaviour (SB) is defined as any waking behaviour characterised by low energy expenditure  
9  
10 ( $\leq 1.5$  Metabolic Equivalent of Task (METs)) while in a sitting, lying or reclining posture (1). In this study, we  
11  
12 use the common approach of interpreting sedentary behaviour as sitting/lying down during waking hours  
13  
14 without being otherwise active (2). SB is the focus of considerable clinical, policy and research interest, as  
15  
16 the evidence supporting its detrimental effects on health and well-being increases (1, 3-6). Higher levels of  
17  
18 moderate-vigorous physical activity (MVPA) may reduce risk associated with more daily sedentary time (5).  
19  
20 However, achieving recommended levels of MVPA to offset potential harms of high levels of SB (i.e.  $>300$   
21  
22 min/week of MVPA) is likely to be challenging (5), particularly for stroke survivors. Evidence suggests this  
23  
24 population group are more sedentary and engage in longer unbroken bouts of sedentary behaviour than  
25  
26 other population groups (7-9) and this appears to be independent of the level of functional recovery (10-12)  
27  
28 At six months after stroke physical ability only has a small influence on time spent sitting among those living  
29  
30 at home (10). Epidemiological studies indicate that stroke survivors are in the highest quartile for  
31  
32 cardiovascular risk and increased sedentary behaviour adds to this rising risk (13). Thus, reducing SB has  
33  
34 been suggested as a new target for therapeutic intervention after stroke (14).  
35  
36  
37  
38

39 In 2016, an international group of stroke recovery and rehabilitation experts reported that inadequate  
40  
41 theoretical intervention development may explain the lack of efficacy of many existing interventions  
42  
43 targeting people after stroke (15). The Medical Research Council (MRC) guidelines advocate the  
44  
45 importance of using theory and evidence in developing complex interventions (16). It has also been  
46  
47 suggested that taking a partnership approach (e.g. co-production) can facilitate the development of feasible  
48  
49 and context-sensitive interventions and may increase the likelihood of developing an intervention that is  
50  
51 efficacious, due to the active involvement of all relevant stakeholders (17).  
52  
53  
54

## 55 RECREATE Programme 56 57 58 59 60

79 Our National Institute for Health and Care Research (NIHR) funded seven year research programme  
1  
2 (RECREATE) seeks to develop and evaluate strategies for reducing SB after stroke to improve outcomes.  
3  
4 The Get Set Go intervention was developed using a structured process, guided by the Behaviour Change  
5  
6 Wheel (BCW) which incorporates the Theoretical Domains Framework (TDF) (18) in combination with a co-  
7  
8 production approach (19) and tested as part of a feasibility study. Get Set Go aims to decrease SB after  
9  
10 stroke by increasing the frequency and duration of standing and moving. The intervention is a whole  
11  
12 service intervention, designed to be implemented and embedded in routine practice. Delivery commences  
13  
14 in the inpatient stroke unit and continues once the stroke survivor is discharged home for at least 12 weeks.  
15  
16

17  
18 The intervention includes multiple components and focuses on:  
19

- 20 a) Educating staff and stroke survivors (and their family/ friends/ carers where appropriate) about the  
21 importance of standing and moving after stroke;  
22
- 23 b) Preparing and enabling staff to support and encourage stroke survivors to stand and move more in  
24 everyday stroke care (as part of routine practice);  
25
- 26 c) Encouraging stroke survivors to monitor their own standing and moving, with assistance from family/  
27 friends/ carers where appropriate.  
28  
29  
30  
31  
32

33  
34  
35 As GSG is delivered at a service level, all clinical staff in services randomised to deliver the intervention will  
36  
37 be invited to attend a training session (~one hour). This will outline the intervention rationale and will  
38  
39 provide an overview of key intervention components to prepare staff for delivering GSG. Staff will  
40  
41 participate in practical tasks aimed at ensuring they feel confident to support and encourage stroke  
42  
43 survivors who are capable of standing independently or with the assistance of one to stand and move more  
44  
45 as part of routine stroke care. Staff will be asked to make recommendations for how much standing and  
46  
47 moving individuals should be doing based on their usual assessment techniques and clinical judgement.  
48  
49 They will be asked to regularly review these recommendations and modify these in line with stroke  
50  
51 survivors' capabilities and circumstances.  
52  
53

54  
55 Staff will be provided with a range of documents to record this activity. Stroke survivors will be encouraged  
56  
57 to form habits around standing and moving as part of their day by recording and monitoring this in an  
58  
59

107 information based guide. Staff will be encouraged to include families in the intervention so they can  
108 undertake a supportive role in encouraging standing and moving in the inpatient setting and when the  
109 stroke survivor returns home. A Template for Intervention Description and Replication (TIDieR) checklist  
110 (20) will be published with trial findings.

111 The RECREATE multicentre cluster randomised controlled trial (cRCT) aimed to evaluate the clinical and  
112 cost effectiveness of the Get Set Go intervention. NHS stroke services randomised to the intervention  
113 group will be trained to deliver the intervention, whilst those randomised to the control group will continue  
114 usual practice. All patients in the stroke services randomised to the intervention will be exposed to Get Set  
115 Go. The trial originally aimed to recruit 1,156 stroke survivors in 34 NHS stroke services; however due to  
116 issues associated with the worldwide COVID pandemic, a decision was made in agreement with the funder  
117 (NIHR) to reduce the trial in size and scope to become an external pilot trial. Accordingly, the recruitment  
118 target was revised to 300-400 participants from 15 NHS stroke services, and the objectives were amended  
119 as given a definitive evaluation of effectiveness was no longer be possible (protocol for the external pilot  
120 cRCT is reported separately). In view of this a decision was also made to reduce the number of process  
121 evaluation services from 10 to six. The primary outcome is extended activities of daily living 12 months  
122 following recruitment (Nottingham Extended Activities of Daily Living (NEADL)). Secondary outcomes  
123 include SB at 12 months, cost-effectiveness, disability, quality of life, and reduction of cardiovascular risk  
124 factors

### 125 **Process evaluation**

126 Complex interventions consist of multiple interacting components, and generate changes within complex  
127 systems including the interactions between individuals and teams (e.g. providers and recipients) (21). As  
128 Get Set Go includes multiple components and targets the behaviour of health professionals, stroke  
129 survivors, and their carers/family/friends (hereafter all referred to as carers in this paper) in inpatient and  
130 community settings, it is important to understand how the complexities of human behaviour and  
131 implementation across these different contexts impacts outcomes. Process evaluations are integral to  
132 understanding factors which may have contributed to the trial outcomes, and to help understand and  
133 evaluate the theoretical assumptions underpinning an intervention (22).

135 The MRC guidance (16, 22) recommends providing a clear description of the intervention and its causal  
136 assumptions and Moore et al. (22) state that the interpretation of intervention outcomes should be informed  
137 by an investigation of three key functions: (1) implementation, 2) mechanisms of impact and 3) context)  
138 (22). In our process evaluation, the MRC guidance ensured we developed a detailed programme theory  
139 represented in a logic model and supported with a written description of how the intervention is intended to  
140 work. We also aligned our objectives with the three key functions and selected appropriate methods,  
141 according to examples provided by Moore et al. (13).

142 This paper describes the protocol for the pre-planned mixed-methods process evaluation embedded in the  
143 RECREATE pilot cRCT.

## 144 **Aims and objectives**

145 The process evaluation aims to explore and understand the implementation of Get Set Go and how it is  
146 experienced and understood by providers and recipients by addressing the following objectives:

- 147 1) Describe and clarify causal assumptions about the intervention, and its mechanisms of impact
- 148 2) Describe intervention delivery and assess intervention fidelity
- 149 3) Explore views, perceptions and acceptability of the intervention to staff, stroke survivors and their  
150 carers
- 151 4) Establish the contextual factors that may influence implementation, intervention mechanisms, and  
152 outcomes

## 153 **METHODS AND ANALYSIS**

154 A mixed- methods process evaluation underpinned by the MRC guidance for process evaluations will be  
155 conducted by two researchers (JFJ and RS). JFJ is a Senior Research Fellow leading the process  
156 evaluation and RS is a Research fellow working on the process evaluation. Both are experienced  
157 qualitative researchers, and each have 15 years of experience in conducting a range of qualitative methods  
158 analytical approaches. This approach will combine non-participant observations of staff training sessions,  
159 non-participant observations in both inpatient and community settings; semi-structured interviews with  
160 stroke survivors, carers and staff, and documentary analysis of key intervention documents.

162 **PATIENT AND PUBLIC INVOLVEMENT:** Patients and/or the public are integral to the conduct of the  
1  
2  
163 research outlined.

### 164 165 **Study setting**

166 The RECREATE project will be conducted in UK stroke services comprising inpatient and community  
167 settings. The process evaluation will be undertaken in six services (four intervention, two control) that will  
168 be included in a staggered nature due to the nature of the trial set-up. We will seek to include services that  
169 vary according to geographical location and stroke service pathways. For example, some services will  
170 include a hyper-acute, acute and rehabilitation service in one location, whereas others will be across  
171 different locations. In terms of community service provision, some will have shorter Early Supported  
172 Discharge (ESD) services whereas others will have services that are not time limited. Data collection will  
173 begin in August 2021 and is expected to be complete in May 2023 (Figure 1). Data collection activity will be  
174 shared by JFJ and RS. Each researcher will undertake activity at three of the six sites each. Where needed  
175 to manage the workload, there may be instances where JFJ or RS share activity within their allocated sites.

178  
1  
2  
179  
4  
180  
6  
7  
181  
9  
10  
182  
12  
183  
14  
184  
16  
17  
185  
19  
20  
186  
22  
23  
187  
25  
26  
188  
28  
29  
189  
31  
32  
190  
34  
35  
191  
36  
37  
38  
192  
39  
40  
41  
193  
42  
43  
44  
194  
45  
46  
47  
195  
48  
49  
196  
51  
52  
197  
54  
55  
198  
57  
58  
199  
60

**[Insert Figure 1: Process Evaluation Flowchart]**

For peer review only

## Theoretical approach

The MRC guidance for process evaluations (22) guided this process evaluation to facilitate a comprehensive understanding of factors that influence whether an intervention is effective or ineffective. The guidance also provides flexibility to select relevant theories. Figure 2 shows how objectives and data collection methods fit with the MRC guidance (22).

**[Insert Figure 2: Process evaluation objectives and methods mapped to the MRC guidance (Moore et al., 2015)]**

For peer review only

208 The Get Set Go intervention is designed to target the behaviours of staff, patients and carers, and will be  
209 implemented in complex settings; therefore the process evaluation focuses on individual-level behaviour  
210 change, and implementation processes. During intervention development, the TDF (Cane et al., 2012) was  
211 used whilst working through the BCW, to identify determinants of behaviour that need to be addressed with  
212 the intervention (e.g. skills, knowledge, and beliefs). Behaviour Change Techniques (BCTs) were then  
213 selected to address behaviours for the different individuals e.g. staff, patients and carers (19). The  
214 determinants are presented in the logic model as part of representing the intervention's intended  
215 mechanisms of impact; one of the key functions according to Moore et al. (22).

219 To address the other two key functions (implementation and context), an implementation plan was  
220 developed based on the findings from the feasibility study. This expands the information in the logic model  
221 to outline in detail the processes that staff would ideally engage in to implement the intervention.  
222 Normalisation Process Theory (NPT) was used to formulate the implementation plan, based on four  
223 constructs: coherence, cognitive participation, collective action, and reflexive monitoring (23).

231 The theoretical framework of acceptability (24) is another important framework in this process evaluation as  
232 part of addressing objective 3. It comprises seven constructs: affective attitude, burden, ethicality,  
233 intervention coherence, opportunity costs, perceived effectiveness and self-efficacy. This framework, along  
234 with the TDF and NPT, will all be used to inform the data collection and the interpretation and analysis of  
235 findings.

### 236 **Study participants**

237 Participants (staff, patients and in some cases carers) included in the study will be recruited from  
238 intervention and control services. They will be invited to take part in observations and interviews. See  
239 Table 1 for the eligibility criteria.



**Table 1: Eligibility criteria**

|                       | <b>Inclusion criteria</b>                                                                                                                                                                                                                                                                                                                                                                                                                                                                                                                                                                                                                                                                                                                                                                                                                                                                                                                                                               | <b>Exclusion criteria</b>                                                                                                                                                                                             |
|-----------------------|-----------------------------------------------------------------------------------------------------------------------------------------------------------------------------------------------------------------------------------------------------------------------------------------------------------------------------------------------------------------------------------------------------------------------------------------------------------------------------------------------------------------------------------------------------------------------------------------------------------------------------------------------------------------------------------------------------------------------------------------------------------------------------------------------------------------------------------------------------------------------------------------------------------------------------------------------------------------------------------------|-----------------------------------------------------------------------------------------------------------------------------------------------------------------------------------------------------------------------|
| <b>Stroke patient</b> | <ul style="list-style-type: none"> <li>• Aged <math>\geq 16</math> years at time of stroke</li> <li>• Clinical diagnosis of new or recurrent ischaemic or haemorrhagic (excluding subarachnoid haemorrhage) stroke</li> <li>• Require manual contact of no more than one person to stand to prevent falling (continuous or intermittent light touch to assist balance or co-ordination, i.e., not to support body weight)</li> <li>• Plan to live in the community post-discharge</li> <li>• For individual focused observations (non-participant) of care and treatment or individual activity related to intervention provision: are able and willing to provide written informed consent or for whom a consultee declaration (England) is provided</li> <li>• For interviews: willing to provide consent to follow-up contact for interview, prior to the point of discharge from the stroke service and are able to provide informed consent</li> <li>• English-speaking</li> </ul> | <ul style="list-style-type: none"> <li>• Receiving palliative care</li> <li>• Due to be discharged outside the defined geographical area of the associated community service(s) participating in the trial</li> </ul> |

|                                                                                                                                                                                                                                          |                                                                                                                                                                                                                                                                                                                                                                                                                                                                                                                                                                                      |                                                                                                    |
|------------------------------------------------------------------------------------------------------------------------------------------------------------------------------------------------------------------------------------------|--------------------------------------------------------------------------------------------------------------------------------------------------------------------------------------------------------------------------------------------------------------------------------------------------------------------------------------------------------------------------------------------------------------------------------------------------------------------------------------------------------------------------------------------------------------------------------------|----------------------------------------------------------------------------------------------------|
| <p>1<br/>2<br/>3<br/>4<br/>5<br/>6<br/>7<br/>8<br/>9<br/>10<br/>11<br/>12<br/>13<br/>14<br/>15<br/>16<br/>17<br/>18<br/>19</p> <p><b>Carer</b></p>                                                                                       | <ul style="list-style-type: none"> <li>• Aged <math>\geq 16</math> years</li> <li>• Family member or friend regularly engaging with a stroke survivor participant (&gt;once per fortnight)</li> <li>• Able to provide informed consent</li> <li>• Stroke patient agrees for carer to be present in interview or observation</li> <li>• English-speaking</li> </ul>                                                                                                                                                                                                                   | <ul style="list-style-type: none"> <li>• Stroke patient does not consent to participate</li> </ul> |
| <p>20<br/>21<br/>22<br/>23<br/>24<br/>25<br/>26<br/>27<br/>28<br/>29<br/>30<br/>31<br/>32<br/>33<br/>34<br/>35<br/>36<br/>37<br/>38<br/>39<br/>40<br/>41<br/>42<br/>43<br/>44<br/>45<br/>46<br/>47<br/>48<br/>49</p> <p><b>Staff</b></p> | <ul style="list-style-type: none"> <li>• A registered physiotherapist, occupational therapist, nurse, doctor; or rehabilitation/ therapy assistant, Stroke Care Coordinator or other multidisciplinary team member working in a participating stroke service for a significant amount of time each week (e.g. 20 hours per week)</li> <li>• Are able and willing to provide written/verbal informed consent for observations of care and treatment related to the Get Set Go intervention provided as part of the stroke service (either in hospital or in the community)</li> </ul> |                                                                                                    |

50  
51  
52  
53  
54  
55  
56  
57  
58  
59  
60

We aim to recruit staff for interviews across inpatient and community settings; 10 in intervention services (including two in a managerial position), and 6 in control services (one in a managerial position). We aim to recruit five patients in each of the intervention and control services. Patients will be asked if they would like a carer to be present in the interview.

242  
1  
243 Participants will provide either verbal or written consent (depending on the circumstances) to take part in  
3  
4  
244 focused non-participant observations and semi-structured interviews. Participants are free to withdraw at  
5  
6  
245 any time without affecting their treatment. Participants will be made aware that if they withdraw, data  
7  
8  
246 collected up to that point will be included in analysis unless they request otherwise. Data will be removed  
9  
10  
247 on request provided it is still feasible to do so depending on the stage of write up.  
11  
12

### 248 14 249 **Data collection methods** 16

250 Qualitative data will contribute to understanding intervention mechanisms and their impacts, intervention  
18  
251 fidelity, perceptions of the intervention and the extent to which it is acceptable and the contextual factors  
20  
252 that may influence implementation, intervention mechanisms and outcomes. Quantitative data  
21  
22  
253 (documentary analysis and data relating to implementation) will provide additional insights into intervention  
23  
24  
254 fidelity. Table 2 provides an overview of all data to be collected.  
25  
26

### 255 27 256 **Table 2: An overview of data collection methods for the process evaluation** 29 30 31 32 33 34 35 36 37 38 39 40 41 42 43 44 45 46 47 48 49 50 51 52 53 54 55 56 57 58 59 60

|              | Data collection                               | Setting (COVID adaptation)                              | Timing                                                               | Quantities                                                                                                                              | Aims (Objectives)                                                                                                                                                | Data collection informed by                                                                                                                                                          | Analysis method                            |
|--------------|-----------------------------------------------|---------------------------------------------------------|----------------------------------------------------------------------|-----------------------------------------------------------------------------------------------------------------------------------------|------------------------------------------------------------------------------------------------------------------------------------------------------------------|--------------------------------------------------------------------------------------------------------------------------------------------------------------------------------------|--------------------------------------------|
| Observations | Training at intervention services             | Inpatient and community (Observe via video call)        | As training is delivered                                             | Inpatient and community combined: ~1 hour each session, 2-3 sessions per service                                                        | Intervention delivery and engagement (Objectives 2, 3, 4)                                                                                                        | Observational framework listing intervention components and behaviours expected if delivered with fidelity.                                                                          | Descriptive summaries, using MRC framework |
|              | Baseline at intervention and control services | Inpatient and community (Staff telephone conversations) | Before intervention delivery                                         | <b>Inpatient:</b> ~5 visits (20 hours) including ~3 therapy sessions, per service.<br><b>Community:</b> ~3 therapy sessions per service | Understand usual practice at the service, including how staff support standing and moving (Objectives 2, 4)                                                      | Researcher fieldnotes, informed by Spradley's descriptive question matrix (25)                                                                                                       | Thematic analysis                          |
|              | Time points 1, 2 & 3 at intervention services | Inpatient and community (Staff telephone conversations) | 1-2 months, 4-5 months & 8-9 months after starting trial recruitment | <b>Inpatient:</b> ~8 visits (32 hours) including ~3 therapy sessions, per service.<br><b>Community:</b> ~3 therapy sessions per service | Fidelity of intervention delivery, and influencing factors (Objectives 1, 2, 3, 4)                                                                               | Observational framework listing behaviours and intervention use expected if delivered with fidelity. Researcher fieldnotes, informed by Spradley's descriptive question matrix (25). | Thematic analysis                          |
|              | Time points 1 & 2 at control services         | Inpatient and community (Staff telephone conversations) | 2-3 months & 6-7 months after starting trial recruitment             | <b>Inpatient:</b> ~5 visits (20 hours) including ~3 therapy sessions, per service<br><b>Community:</b> ~3 therapy sessions per service  | Understand usual practice at the service, including how staff support standing and moving, and differences/similarities with intervention services (Objective 4) | Researcher fieldnotes, informed by Spradley's descriptive question matrix (25).                                                                                                      | Thematic analysis                          |
|              | Documentary analysis                          | Inpatient and community (In                             | Alongside intervention                                               | Complete documentary                                                                                                                    | Capture use and delivery (adherence & compliance) of                                                                                                             | Documentary analysis form informed by fidelity                                                                                                                                       | Descriptive summaries                      |

|                            |                                                       |                                                           |                                                    |                                                                         |                                                                                                                                                                                                       |                                                                                                                |                    |
|----------------------------|-------------------------------------------------------|-----------------------------------------------------------|----------------------------------------------------|-------------------------------------------------------------------------|-------------------------------------------------------------------------------------------------------------------------------------------------------------------------------------------------------|----------------------------------------------------------------------------------------------------------------|--------------------|
|                            | intervention services (Time points 1, 2 and 3)        | patients home if unable to attend wards)                  | service observations                               | analysis form observation time points 1, 2 & 3                          | intervention components (e.g. stroke patient use of intervention components) (Objective 2)                                                                                                            | expectations                                                                                                   |                    |
| Semi structured interviews | Stroke patients (and carers) at intervention services | Patients' own home (Telephone or video call)              | ~4-6 months after service started the intervention | Inpatient and community combined: n= 5 per service                      | Explore stroke patient and carer experiences and views of standing and moving after stroke. Explore intervention use, acceptability, impact and barriers/facilitators. (Objectives 1, 2, 3, 4)        | Topic guide informed by normalisation process theory (23) and the intervention acceptability framework (24).   | Framework analysis |
|                            | Staff at intervention services                        | Inpatient and community setting (Telephone or video call) | Shortly after service stops using the intervention | Inpatient and community combined: n=10 per service (including 2 senior) | Explore views on supporting standing and moving after stroke. Explore staff views of the intervention and barriers/facilitators for embedding and sustaining the intervention (Objectives 1, 2, 3, 4) | Topic guide informed by normalisation process theory (23) and the intervention acceptability framework (24).   | Framework analysis |
|                            | Stroke patients (and carers) at control services      | Community (Telephone or video call)                       | ~6 months after trial recruitment starts           | Inpatient and community combined: n=5 per service                       | Explore stroke patient and carer experiences and views of standing and moving after stroke (Objective 4).                                                                                             | Topic guide informed by , normalisation process theory (23) and the intervention acceptability framework (24). | Framework analysis |
|                            | Staff at control services                             | Inpatient and community (Telephone or video call)         | ~9-12 months after starting trial recruitment      | Inpatient and community combined: n=6 per service (including 1 senior)  | Explore staff views on supporting standing and moving after stroke (Objective 4)                                                                                                                      | Topic guide informed by normalisation process theory (23) and the intervention acceptability framework (24).   | Framework analysis |

## Qualitative data

### **Non-participant observations in intervention and control services – general and focused**

Training observations will only be conducted in intervention services (Table 2). These will focus on the fidelity of training delivery i.e. they will establish whether the training is being delivered by the implementation team as intended. They will also focus on engagement and interactions between the implementers and the staff receiving the training. We have developed an observational framework to assist the researchers in conducting these observations.

In both intervention and control services, baseline observations followed by a series of general and focused observations at different time points (three further time points in intervention services and two in control services) will be conducted (figure 1). General observations will be conducted in ward areas or community settings to gain an overall understanding of care provided and how staff members interact with each other and with patients in these general spaces. Researchers will introduce themselves to staff and patients to explain why they are undertaking the observations. No formal consent will be required for general observations but staff and patients will have the opportunity to object to being observed. For focused observations of 1:1 therapy sessions, researchers will obtain consent from both the staff members and stroke patients engaging in the therapy session. We intend to include stroke patients with aphasia and those who lack capacity in these focused observations where they are willing. Conversations with staff will help to identify whether patients may need the accessible information sheets and consent forms; and there is also an option for consultees to provide consent on behalf of the patient in circumstances where they lack capacity (consultee declaration).

In both intervention and control services, the baseline observations will be conducted to establish a baseline understanding of the organisations and how stroke care is provided. Observations at two further time points at control services will have a similar focus to the initial baseline observations with some additional exploration of staff and patients' views on standing and moving after stroke. In intervention services, the observations at the three time points after baseline will be undertaken to explore the fidelity of intervention delivery (e.g. whether intervention documents were evident in the inpatient and community settings, whether staff are

286 encouraging standing and moving as part of their practice or talking to stroke survivors about GSG) and the  
287 factors that influence this, including: contextual factors (e.g. where intervention materials are stored, how the  
288 stroke service is configured, how daily routines are managed), competence of staff delivering the intervention;  
289 and the engagement of staff, stroke survivors and carers with the intervention materials (e.g. completion of  
290 documents)

291  
292 During general observations, researchers will look for evidence of the intervention being used/ adopted in  
293 inpatient and community environments. It will be an opportunity to identify changes to daily practice (from  
294 baseline) and whether there is evidence that the intervention is integrated into conversations and impacting  
295 on behavioural changes during day to day care. The focused observations will provide an opportunity to see  
296 if there are any specific changes to therapy and whether intervention language is used. For example  
297 instances of staff encouraging stroke survivors to stand and move in the time aside from therapy sessions.  
298 In both cases researchers would expect to see staff using or talking through intervention materials. If there  
299 are circumstances where this is not the case it would be an opportunity for the researchers to understand  
300 what factors are impacting upon implementation in the context of daily practice.

301  
302 In all cases, the researchers will write detailed notes during their observations and use Spradley's  
303 descriptive question matrix (25) as a guide for what to document. Researchers will interact with staff in  
304 instances where it feels appropriate to clarify what they have observed. However, they will not seek to get  
305 involved in conversations that interfere with the care being provided. Contextual features relevant to the  
306 stroke services, including relationships with social care, voluntary, or community agencies will also be  
307 considered.

### 308 309 **Semi- structured interviews**

310 Semi-structured interviews will be undertaken with a sample of staff, stroke survivors and their carers from  
311 the participating services (Table 2). Broadly, these interviews will be conducted in addition to the observations  
312 to provide further insights into different perceptions of the intervention, its acceptability and the factors that

influence whether it can be implemented. Table 1 outlines the inclusion and exclusion criteria for all participants.

### **Stroke survivor (and carers where appropriate)**

A proportion of participants will be invited to take part in a semi-structured interview if they have already consented to the trial and / or completed a 'consent to contact form' which indicates they are willing to be approached about participating in an interview. At the time of signing the initial consent for the trial it will be made clear that not all participants will be contacted regarding an interview and separate consent would be obtained if participants take part in interviews. Their details will be held securely at the CTRU and will be provided to the process evaluation researchers via a Secure File Transfer system.

The interviews will take place approximately four - six months after commencement of the Get Set Go intervention for each stroke patient, with some flexibility. Sampling for the participants across the services (intervention n = 20 across 4 services, control n = 10 across 2 services) will consider severity of stroke, gender, communication difficulties, occupational status and living arrangements (alone/with a carer).

Following initial contact via phone, email or post, interested participants will be provided with an information sheet via post or email. At this point JFJ and RS will check if an accessible information sheet is required.

Once they have had sufficient time to consider whether they would like to take part in an interview, potential participants will have the opportunity to ask any questions and if they are happy, an interview will be arranged. Stroke patients can express if they would like a carer to be present. Interviews will take place in the participants own home or via telephone/ video call if appropriate. Consent from stroke patients and where relevant, their carer will be sought prior to interview (process evaluation consent is separate from trial consent). The research teams recruiting the participants for the trial will have already established capacity. JFJ and RS are experienced researchers in this population and will be able to make judgements about capacity if there are any changes in circumstances at the point of the interview. Being able to provide consent is an inclusion criteria for the interviews, however there is an option for someone to provide consent as a witness in cases where stroke survivors have capacity but are unable to physically consent due to physical impairments post stroke (e.g. difficulty writing). Table 2 provides an overview of the focus of



340 these interviews. During interviews, stroke patients will be asked to share intervention materials they  
1 received, to facilitate the documentary analysis.  
2  
3  
4

342 We have also gained ethical approval to approach patients who have not consented to the trial and ask if  
5 they would like to take part in an interview. This increases our interviewee pool where needed and provides  
6  
7  
8 opportunity for participants to share their experiences of the intervention and the extent to which they think  
9  
10  
11 it is acceptable. To facilitate this, the individuals will be approached by a process evaluation researcher and  
12  
13  
14 provided with an information sheet and a 'consent to contact' form. Their carer (if available) will also be  
15  
16  
17 approached for consent to contact. They will subsequently be approached by the researcher to arrange  
18  
19  
20 consent and interview. All data will be held at Academic Unit of Ageing and Stroke Research (AUASR).  
21  
22

### 349 **Staff**

350 A sample of staff from across the services (intervention n = 40 across 4 services, control n = 12 across 2  
23  
24  
25 services) will be approached face to face at their work-place providing there are no COVID-19 restrictions  
26  
27  
28 in place. If COVID-19 restrictions interfere with recruitment, the researcher will liaise with a key member of  
29  
30  
31 staff to identify which staff may be interested in taking part in an interview. The aim is to interview a range  
32  
33  
34 of staff from across inpatient and community settings in different disciplines and levels of seniority.  
35  
36  
37 Following the initial approach, similar procedures to those outlined above for stroke survivors will be  
38  
39  
40 undertaken to ensure that staff are provided with an information sheet and given time to consider  
41  
42  
43 participation and ask questions. Staff interviews will take place as the intervention ceases at each service  
44  
45  
46 (approximately 9 months into intervention delivery). Table 2 outlines the focus of the interviews and how  
47  
48  
49 they differ between the intervention and control services. Fully informed consent will be obtained prior to  
50  
51  
52 the interview which will take place in a location of staffs' choosing or via telephone/video call.  
53  
54  
55

### 362 **Data collection materials:**

363 Documents have been created and will be used to facilitate the data collection process during the  
54  
55  
56 observations (Table 2). These include observational frameworks, topic guides and a documentary analysis  
57  
58  
59  
60

365 form. The researchers will also use the existing descriptive question matrix (25) to guide the focus of  
366 observations.

### 368 **Training observation framework**

369 The training observation framework was created to capture fidelity, competence and engagement in  
370 relation to training sessions delivered by the implementation team to intervention services. The framework  
371 will be used to guide the observations and score them (scale 1-5): whether the content for each slide was  
372 delivered as intended (fidelity), how well content was delivered (competence), and how engaged the  
373 facilitators and participants were during the session. Researchers will also take notes on environmental  
374 factors that might be influential, the extent to which there is staff buy-in to the intervention and any  
375 additional reflections or aspects to follow up.

### 377 **Fidelity framework (aligned with the logic model)**

378 We have created fidelity frameworks (one for inpatient, one for community settings) to be completed during  
379 observations in the inpatient and community setting. These list all intervention components and expected  
380 behaviour if the intervention is implemented with fidelity. As with the training framework, it captures  
381 competence and engagement. The competencies are aligned with TDF Framework components, included  
382 in the logic model.

### 384 **Implementation framework**

385 In addition to the frameworks, we will collect detailed information about the implementation of the  
386 intervention at each of the intervention services included in the process evaluation using the  
387 implementation plan described in the earlier theoretical approach section. We will write notes in each  
388 section of the plan and indicate what has been implemented as planned, and any additional unexpected  
389 implementation strategies. We will also highlight which constructs of NPT are being addressed and note  
390 cases where they are not being addressed as planned. This process will enhance our understandings of  
391 the implementation processes needed to successfully implement the intervention.

### 392 **Topic guides**

Topic guides for each of the different interviews (see table 2) were developed based on feasibility study findings, and have also been informed by NPT (23), the theoretical framework of acceptability (24), and the TDF (18). In line with NPT, questions focus on how staff make sense of the intervention (coherence); how they work together to build a community of practice which facilitates implementation (cognitive participation); the operational practices involved in enacting the practices (collective action) and the appraisal work to understand ways that the new practices affect those around them (reflexive monitoring). Questions to address acceptability have been included to address the seven constructs within the framework by Sekhon et al. (24). Questions focused on the TDF domains in the logic model have also been included to understand more about for example skills, knowledge, beliefs around reducing SB from the perspectives of staff, patients and where relevant their families, friends, carers. See supplementary file 1.

Interviews will be adapted to be inclusive of stroke patients, for instance by using accessible information sheets, adapting the topic guide / using appropriate images and writing down key words for people with aphasia. Interviews will be audio recorded and a summary of contextual factors written by the interviewer.

## Quantitative data

### **Documentary analysis form**

A documentary analysis form will be used during observations and interviews, conducted on patient-held intervention components (e.g. information guide used to record standing and moving) and staff-completed records. This form will document how many documents have been checked, how many are complete up to date, and the week in which completion stopped (if incomplete). These capture the recording of delivery of intervention components and provide evidence of fidelity.

### **Data analysis**

All data collected will be analysed to address the relevant objectives (Table 2). Training observations will be summarised with a focus on fidelity, acceptability and engagement and contextual factors that may have

419 influenced how the training was delivered or received. Relevant headings based on the MRC framework  
1  
2  
3  
4  
5  
6  
7  
8  
9  
10  
11  
12  
13  
14  
15  
16  
17  
18  
19  
20  
21  
22  
23  
24  
25  
26  
27  
28  
29  
30  
31  
32  
33  
34  
35  
36  
37  
38  
39  
40  
41  
42  
43  
44  
45  
46  
47  
48  
49  
50  
51  
52  
53  
54  
55  
56  
57  
58  
59  
60

(e.g. fidelity, contextual factors) will be used to organise the data.

Both observational and interview data will be subject to thematic analysis (26). Data will be analysed by a minimum of two researchers (JFJ and RS). Observational data will be coded into a thematic framework, and then related codes will be grouped together under thematic headings which convincingly capture and explain the relationship between coded elements of text. The interviews will be transcribed verbatim and anonymised. Data will be entered into NVivo 12 software (QSR International, 2018). Interview data will separately be analysed using a thematic approach (26). To produce the thematic frameworks, a proportion of the data will be coded independently (JFJ and RS) and key themes and subthemes will be identified to form the frameworks. The same theories used to inform the topic guides (NPT (23) and the theoretical framework of acceptability (24)) will be used to inform the thematic frameworks and themes that are produced during the analysis of the observations and interviews. The logic model, including the domains outlined in the TDF will also be considered when developing the frameworks and throughout the analysis process.

The training summaries, fidelity frameworks that will be completed during observations, and the implementation plan that will be populated based on meetings with the implementation team, and observational and interview data will be used to support the interpretation of findings and will allow for comparisons to be made between services with regards to implementation fidelity, competency and engagement. Data from documentary analysis will be anonymised and summarised descriptively and will similarly be used to aid the interpretation of findings.

Standard approaches to demonstrating trustworthiness and quality in qualitative research will be used, including: the clear documentation of the research process (methods, analysis and any problems encountered and solutions found); transparency of the development of the observational framework and interview topic guides in-light of on-going analysis; documentation of the contextual features in which the research was carried out; discussions of emerging findings among the research team; and researchers will keep a reflexive diary (27).

The anticipated outputs of this evaluation include: recommendations for intervention refinements (both content and implementation); a revised implementation plan, and a refined logic model (and supporting written intervention description).

## **ETHICAL APPROVAL AND DISSEMINATION**

The study has National Health Service (NHS) permission and was approved by Yorkshire & The Humber - Bradford Leeds Research Ethics Committee (REC reference: 19/YH/0403). In light of the COVID pandemic, an ethical amendment approved remote data collection where needed e.g., observations of staff training and audio recorded interviews via zoom. Findings will be disseminated via peer review publications, and national and international conference presentations.

## **DISCUSSION**

Process evaluations are considered an essential part of designing and testing complex interventions (22). They allow us to understand in detail the myriad of complex factors, and complex processes that contribute to whether an intervention has an impact on outcomes. We intend to add to knowledge about: intervention theory and how interventions contribute to change; how interventions interact with their context, wider system dynamics and impacts on implementation; and how individuals experience interventions (patients, staff, and carers). We also anticipate that the findings will be informative and transferable to other similar research focused on evaluating complex interventions in complex settings.

**AUTHORS' CONTRIBUTIONS:** AF is lead grant holder and Chief Investigator, and will oversee the design and implementation of the trial. JFJ leads the embedded process evaluation and is responsible for planning, undertaking the research and reporting findings alongside RS. SO and LM, assisted by JA, are responsible for managing the delivery of the trial. JA also leads on the ActivPAL and is responsible for the implementation of the intervention alongside SO and AF. RM contributed to the planning of this process evaluation. AFa, GM, CE, CF and DJC are co-investigators who were all involved in the design of the trial and process evaluation, and attend regular programme meetings where advice is provided where needed.

474 All co-investigators and researchers contributed to the development of the protocol. JFJ drafted the  
1  
2  
475 manuscript which is written on behalf of the RECREATE Programme Management Group. All authors read  
3  
4  
476 and approved the final manuscript.  
5  
6

#### 477 8 478 **ACKNOWLEDGEMENTS:**

479 We would like to acknowledge the expert support of the RECREATE Programme Management Group who  
10  
11  
480 meet regularly. The group is comprised of: Jennifer Airlie, Karen Birch, Gillian Carter, Bethan Copsey,  
12  
13  
481 Florence Day, Coralie English, Amanda Farrin, Claire Fitzsimons, Anne Forster, Jessica Faye Johansson,  
14  
15  
482 Rebecca Lawton, Laura Marsden, Gillian Mead, Lauren Moreau, Seline Ozer, Anita Patel, Rosie Shannon,  
16  
17  
483 and Nahel Yaziji.  
18  
19  
20

21  
22  
484 **FUNDING STATEMENT:** This work was supported by the National Institute for Health and Care  
23  
24  
485 Research (NIHR) under its Programme Grants for Applied Research Programme, grant number RP-PG-  
25  
26  
486 0615-20019). The views expressed are those of the author(s) and not necessarily those of the NIHR or the  
27  
28  
487 Department of Health and Social Care. The Funder has had no role in trial design, beyond setting the  
29  
30  
488 research question the trial addresses. Data collection, management, analysis and interpretation will remain  
31  
32  
489 independent of the Funder.  
33  
34  
35

36  
490 **SPONSOR:** The trial sponsor is Bradford Teaching Hospitals NHS Foundation Trust, Research  
37  
38  
491 Management & Support Office, Bradford Institute for Health Research, Bradford, BD9 6RJ, United  
39  
40  
492 Kingdom. Tel: +44 (0)1274 38 2575; e-mail: [jane.dennison@bthft.nhs.uk](mailto:jane.dennison@bthft.nhs.uk). The Sponsor will maintain  
41  
42  
493 oversight of trial processes, but is not involved in trial design or delivery processes. The Sponsor will not  
43  
44  
494 participate in data analysis or trial reporting processes.  
45  
46  
47  
48  
49

496 **Data sharing statement:** The data generated from this process evaluation will be maintained by the  
50  
51  
497 Academic Unit of Ageing and Stroke Research. Any requests for data should be sent to corresponding  
52  
53  
498 author Dr Johansson and would be subject to review with the CI Professor Forster. All data-sharing  
54  
55  
499 activities would require a data-sharing agreement.  
56  
57  
58  
59  
60

**COMPETING INTERESTS STATEMENT:**

AF, AFa, CE, CF, GM and DJC are coinvestigators on the grant funding this work therefore are partially supported by the National Institute for Health and Social Care Research (NIHR) (grant number RP-PG-0615-20019).

AF has received additional research grant support from NIHR through the following funding streams: Senior Investigator award, Health Technology Assessment (HTA) and Health and Social Care Delivery Research (HS&DR). AF has previously received support from the Stroke Association to attend the UK stroke forum and received payment from the National Institute for Health (USA) for panel membership (2021, 2022). AF is currently the chair / a member of programme steering committees for NIHR research programmes (Grant reference numbers: NIHR 202339, NIHR 202020) and has served on the following panels: NIHR Doctoral Fellowships, NIHR senior investigators committee (2019/20), NIHR HS&DR committee (2016-2018) and Stroke Association Funding.

CE has received grant funding from the Netherlands Organisation for Scientific Research (NOW) Taskforce for Applied Research (SIA RAAK) for work in a similar area (i.e. sitting less and moving more after stroke) and is a Non-executive Director representing interests of Research and Chair of Research Advisory Committee for the Stroke Foundation of Australia (unpaid).

CF is a coinvestigator / collaborator on other grants on the topic of sedentary behaviour / physical activity and is therefore partially supported by grant funding received from the University of Edinburgh and the Irish Health Board. CE has previously been supported to conduct work in a similar area by grant funding received from the Chief Scientist Office of the Scottish Government, Medical Research Council (MRC) Public Health Intervention Development (PHIND) award and the University of Edinburgh.

JFJ, LM, RS, RM, JA, SO and DJC report no competing interests related to the manuscript.

**Twitter:** @RECREATE\_stroke

## References

1. Tremblay MS, Aubert S, Barnes JD, Saunders TJ, Carson V, Latimer-Cheung AE, et al. Sedentary behavior research network (SBRN)—terminology consensus project process and outcome. *International journal of behavioral nutrition and physical activity*. 2017;14:1-17.
2. Owen N, Sugiyama T, Eakin EE, Gardiner PA, Tremblay MS, Sallis JF. Adults' sedentary behavior: determinants and interventions. *American journal of preventive medicine*. 2011;41(2):189-96.
3. Rezende LFMd, Rodrigues Lopes M, Rey-López JP, Matsudo VKR, Luiz OdC. Sedentary behavior and health outcomes: an overview of systematic reviews. *PloS one*. 2014;9(8):e105620.
4. Tremblay MS, Colley RC, Saunders TJ, Healy GN, Owen N. Physiological and health implications of a sedentary lifestyle. *Applied physiology, nutrition, and metabolism*. 2010;35(6):725-40.
5. Dempsey PC, Biddle SJH, Buman MP, Chastin S, Ekelund U, Friedenreich CM, et al. New global guidelines on sedentary behaviour and health for adults: broadening the behavioural targets. *International Journal of Behavioral Nutrition and Physical Activity*. 2020;17(1):151.
6. Health UDo, Services H. Physical activity guidelines advisory committee. 2018 physical activity guidelines advisory committee scientific report. Published online. 2018.
7. Butler EN, Evenson KR. Prevalence of physical activity and sedentary behavior among stroke survivors in the United States. *Topics in stroke rehabilitation*. 2014;21(3):246-55.
8. English C, Healy GN, Coates A, Lewis L, Olds T, Bernhardt J. Sitting and activity time in people with stroke. *Physical therapy*. 2016;96(2):193-201.
9. Paul L, Brewster S, Wyke S, Gill JM, Alexander G, Dybus A, et al. Physical activity profiles and sedentary behaviour in people following stroke: a cross-sectional study. *Disability and rehabilitation*. 2016;38(4):362-7.
10. English C, Healy GN, Coates A, Lewis LK, Olds T, Bernhardt J. Sitting time and physical activity after stroke: physical ability is only part of the story. *Topics in stroke rehabilitation*. 2016;23(1):36-42.
11. English C, Manns PJ, Tucak C, Bernhardt J. Physical activity and sedentary behaviors in people with stroke living in the community: a systematic review. *Physical therapy*. 2014;94(2):185-96.
12. Tiegies Z, Mead G, Allerhand M, Duncan F, Van Wijck F, Fitzsimons C, et al. Sedentary behavior in the first year after stroke: a longitudinal cohort study with objective measures. *Archives of physical medicine and rehabilitation*. 2015;96(1):15-23.
13. Wullems JA, Verschueren SM, Degens H, Morse CI, Onambélé GL. A review of the assessment and prevalence of sedentarism in older adults, its physiology/health impact and non-exercise mobility counter-measures. *Biogerontology*. 2016;17:547-65.
14. Morton S, Fitzsimons C, Hall J, Clarke D, Forster A, English C, et al. Sedentary behavior after stroke: A new target for therapeutic intervention. SAGE Publications Sage UK: London, England; 2019.
15. Walker MF, Hoffmann TC, Brady MC, Dean CM, Eng JJ, Farrin AJ, et al. Improving the development, monitoring and reporting of stroke rehabilitation research: Consensus-based core recommendations from the Stroke Recovery and Rehabilitation Roundtable. *International Journal of Stroke*. 2017;12(5):472-9.
16. Skivington K, Matthews L, Simpson SA, Craig P, Baird J, Blazeby JM, et al. A new framework for developing and evaluating complex interventions: update of Medical Research Council guidance. *bmj*. 2021;374.
17. Voorberg WH, Bekkers VJ, Tummers LG. A systematic review of co-creation and co-production: Embarking on the social innovation journey. *Public management review*. 2015;17(9):1333-57.
18. Cane J, O'Connor D, Michie S. Validation of the theoretical domains framework for use in behaviour change and implementation research. *Implementation Science*. 2012;7(1):37.
19. Hall J, Morton S, Hall J, Clarke DJ, Fitzsimons CF, English C, et al. A co-production approach guided by the behaviour change wheel to develop an intervention for reducing sedentary behaviour after stroke. Pilot and feasibility studies. 2020;6(1):1-13.
20. Hoffmann TC, Glasziou PP, Boutron I, Milne R, Perera R, Moher D, et al. Better reporting of interventions: template for intervention description and replication (TIDieR) checklist and guide. *Bmj*. 2014;348.
21. Moore GF, Evans RE, Hawkins J, Littlecott H, Melendez-Torres G, Bonell C, et al. From complex social interventions to interventions in complex social systems: future directions and unresolved questions for intervention development and evaluation. *Evaluation*. 2019;25(1):23-45.



- 578 22. Moore GF, Audrey S, Barker M, Bond L, Bonell C, Hardeman W, et al. Process evaluation of complex  
579 interventions: Medical Research Council guidance. *bmj*. 2015;350.  
580 23. May C, Finch T, Rapley T. Normalization process theory. *Handbook on Implementation Science*: Edward  
581 Elgar Publishing; 2020.  
582 24. Sekhon M, Cartwright M, Francis JJ. Acceptability of healthcare interventions: an overview of reviews and  
583 development of a theoretical framework. *BMC health services research*. 2017;17(1):1-13.  
584 25. Spradley JP. *Participant observation*: Waveland Press; 2016.  
585 26. Clarke V, Braun V. Thematic analysis. *Encyclopedia of critical psychology*: Springer; 2014. p. 1947-52.  
586 27. Ritchie J, Lewis J, Nicholls CM, Ormston R. *Qualitative research practice: A guide for social science students  
587 and researchers*: sage; 2013.  
588

For peer review only

Figure 1: Process Evaluation Flowchart





Figure 2: Process evaluation objectives and methods mapped to the MRC guidance by Moore et al., 2015

## Supplementary file 1: Topic guides (staff and patients) for intervention and control sites

### 1. Topic guide for staff - intervention

The purpose of this interview is to hear about your experiences with Get Set Go.

|                                                                                                                                                                                                                                                                                                                                                                                                                                                                                                                                                                                                                                                                                                                                                                                                 |                                                                                                                                                                                   |
|-------------------------------------------------------------------------------------------------------------------------------------------------------------------------------------------------------------------------------------------------------------------------------------------------------------------------------------------------------------------------------------------------------------------------------------------------------------------------------------------------------------------------------------------------------------------------------------------------------------------------------------------------------------------------------------------------------------------------------------------------------------------------------------------------|-----------------------------------------------------------------------------------------------------------------------------------------------------------------------------------|
|                                                                                                                                                                                                                                                                                                                                                                                                                                                                                                                                                                                                                                                                                                                                                                                                 | NPT/TDF/<br>Sekhon                                                                                                                                                                |
| <b>1. What is your usual role?</b>                                                                                                                                                                                                                                                                                                                                                                                                                                                                                                                                                                                                                                                                                                                                                              |                                                                                                                                                                                   |
| <ul style="list-style-type: none"> <li>○ Tell me briefly about your role in the stroke service?</li> <li>○ How long have you been working in stroke care?</li> <li>○ Does Get Set Go fit with your usual role?</li> </ul>                                                                                                                                                                                                                                                                                                                                                                                                                                                                                                                                                                       | n/a:<br>contextual<br>information                                                                                                                                                 |
| <b>2. Tell me about how you got involved in Get Set Go?</b>                                                                                                                                                                                                                                                                                                                                                                                                                                                                                                                                                                                                                                                                                                                                     |                                                                                                                                                                                   |
| <ul style="list-style-type: none"> <li>○ How did your involvement in Get Set Go begin? Attend training or discuss with colleagues?</li> <li>○ How was the training? What do you remember about it?</li> <li>○ Was the format OK (in person/ online)?</li> <li>○ Was it applicable to you and your role? Did it change anything for you?</li> <li>○ What do you understand about the purpose of Get Set Go?</li> <li>○ How does Get Set Go differ from the usual care you provide?</li> <li>○ Was it clear from the training what you needed to do yourself and as a team?</li> <li>○ Did you have any questions/concerns in the beginning? Did you feel ready/confident to deliver the intervention?</li> <li>○ Did anything help you make sense of Get Set Go before delivering it?</li> </ul> | <b>Sekhon:</b><br>Affective<br>attitude,<br>ethicality,<br><br>intervention<br>coherence, self-<br>efficacy<br><br><b>NPT:</b><br>Differentiation,<br>individual<br>specification |
| <b>3. How was Get Set Go used on your ward?</b>                                                                                                                                                                                                                                                                                                                                                                                                                                                                                                                                                                                                                                                                                                                                                 |                                                                                                                                                                                   |
| <ul style="list-style-type: none"> <li>○ Did your team deliver all the intervention components? (go through each).</li> <li>○ Do you feel your team have a good understand of Get Set Go and their roles?</li> <li>○ What did you do as a team to ensure a shared understanding of what you want to achieve?</li> <li>○ Overall, which parts worked well / not so well?</li> <li>○ To what extent do you feel your team value Get Set Go?</li> <li>○ Who is responsible for leading/driving Get Set Go forward? Who else was involved?</li> </ul>                                                                                                                                                                                                                                               | <b>Sekhon:</b><br>Intervention<br>coherence<br><br><b>NPT:</b> Communal<br>specification ,<br>initiation,<br>enrolment,<br>legitimation                                           |
| <b>4. Tell me about your experience of using Get Set Go?</b>                                                                                                                                                                                                                                                                                                                                                                                                                                                                                                                                                                                                                                                                                                                                    |                                                                                                                                                                                   |
| <ul style="list-style-type: none"> <li>○ What was your role or involvement with Get Set Go?</li> <li>○ Tell me about your experiences of using each of the intervention components.</li> <li>○ What parts were the easiest or hardest to use?</li> <li>○ Did you feel able to help patients understand the purpose and what they needed to do?</li> <li>○ Were you aware of/ did you use the website?</li> </ul>                                                                                                                                                                                                                                                                                                                                                                                | <b>Sekhon:</b><br><br>Affective<br>attitude, self-<br>efficacy                                                                                                                    |
| <b>Champions:</b> Can you describe your experiences of being a lead for Get Set Go?                                                                                                                                                                                                                                                                                                                                                                                                                                                                                                                                                                                                                                                                                                             |                                                                                                                                                                                   |



|                   |                                                                                                                                                                                                                                                                     |                                             |
|-------------------|---------------------------------------------------------------------------------------------------------------------------------------------------------------------------------------------------------------------------------------------------------------------|---------------------------------------------|
| 1<br>2<br>3<br>4  | <ul style="list-style-type: none"> <li>○ What could we have done to help you use GSG? What would you do differently next time?</li> <li>○ Does Get Set Go meet its purpose to help stroke survivors recover?</li> </ul>                                             | Affective attitude, perceived effectiveness |
| 5<br>6            | <b>9. The impacts of the COVID pandemic</b>                                                                                                                                                                                                                         |                                             |
| 7<br>8<br>9<br>10 | <ul style="list-style-type: none"> <li>○ Has the COVID pandemic influenced your engagement with the Get Set Go intervention?</li> <li>○ Has the COVID pandemic had an influence on how much you have been able to support/encourage standing and moving?</li> </ul> |                                             |
| 11<br>12<br>13    | <b>10. Is there anything else you would like to ask or mention?</b>                                                                                                                                                                                                 |                                             |

## 2. Topic guide for staff control

This topic guide is to gain insights into staff's perceptions and views related to the provision of usual care to stroke survivors- related to standing and moving/mobilising after stroke.

|                                                                                                                                                                                                                                                                                                                                                                                                                                                                                                                                                                                                                                                                                                                                                                                                   | NPT/TDF/<br>Sekhon                                                        |
|---------------------------------------------------------------------------------------------------------------------------------------------------------------------------------------------------------------------------------------------------------------------------------------------------------------------------------------------------------------------------------------------------------------------------------------------------------------------------------------------------------------------------------------------------------------------------------------------------------------------------------------------------------------------------------------------------------------------------------------------------------------------------------------------------|---------------------------------------------------------------------------|
| <b>1. What is your role?</b>                                                                                                                                                                                                                                                                                                                                                                                                                                                                                                                                                                                                                                                                                                                                                                      |                                                                           |
| <ul style="list-style-type: none"> <li>- Tell me briefly about your role in the stroke service?</li> <li>- How long have you been working in stroke care?</li> </ul>                                                                                                                                                                                                                                                                                                                                                                                                                                                                                                                                                                                                                              | n/a<br>contextual information                                             |
| <b>2. Perceptions/ thoughts about standing and moving?</b>                                                                                                                                                                                                                                                                                                                                                                                                                                                                                                                                                                                                                                                                                                                                        |                                                                           |
| <ul style="list-style-type: none"> <li>- What do you think about encouraging patients to stand and move more? (including benefits, how much this is valued)</li> <li>- What sort of time in their care pathway do you think it is most important? (Throughout/inpatient/community).</li> <li>- What do you think it is beneficial for patients to know about standing and moving?</li> </ul>                                                                                                                                                                                                                                                                                                                                                                                                      | <b>Sekhon:</b><br>Affective attitude, ethicality, perceived effectiveness |
| <b>3. Experiences of supporting standing and moving more? (Individual and as a team)</b>                                                                                                                                                                                                                                                                                                                                                                                                                                                                                                                                                                                                                                                                                                          |                                                                           |
| <ul style="list-style-type: none"> <li>- To what extent does your role involve supporting patients to stand and move?</li> <li>- Tell me about your experiences of supporting standing and moving? (as an individual/team- how this is managed at a ward/community service level)</li> <li>- Is this something that is routinely encouraged?</li> <li>- Which staff are most commonly responsible for encouraging/supporting standing and moving?</li> <li>- Are you/ your team aware of any specific initiatives/ tools to support practices related to standing and moving?</li> <li>- To what extent do you feel adequately equipped to support patients to stand and move?</li> </ul>                                                                                                         | <b>Sekhon:</b><br>Self-efficacy                                           |
| <b>4. Challenges or things that help supporting standing and moving?</b>                                                                                                                                                                                                                                                                                                                                                                                                                                                                                                                                                                                                                                                                                                                          |                                                                           |
| <ul style="list-style-type: none"> <li>- What is your view on your team's willingness/ability/capability to support standing and moving?</li> <li>- What is your view on the patient/carer's willingness/ability to practice standing and moving?</li> <li>- What responses have you had from patients and their carers?</li> <li>- Are there any factors that influence whether you would encourage patients to stand and move more? (e.g. priorities, staffing, workload, cost, space, training, resource specific processes, leadership patient ability/willingness, risk, skills/confidence, perceived patient benefit, clear understanding, environment)?</li> <li>- Any other particular things that work particularly well or not so well that might affect standing and moving</li> </ul> | <b>Sekhon:</b><br>Burden, opportunity costs                               |

|                                                                                                                                                                                                              |  |
|--------------------------------------------------------------------------------------------------------------------------------------------------------------------------------------------------------------|--|
| <b>5. Could anything be better?</b>                                                                                                                                                                          |  |
| <ul style="list-style-type: none"> <li>○ Could you or your team do anything more to support/encourage patients to stand or move more?</li> <li>○ How could current practice be further developed?</li> </ul> |  |
| <b>6. The impacts of the COVID pandemic</b>                                                                                                                                                                  |  |
| - Has the COVID pandemic had an influence on how much you have been able to support/encourage standing and moving?                                                                                           |  |
| <b>7. Is there anything else that you would like to ask or mention?</b>                                                                                                                                      |  |

**3. Topic guide for stroke survivors and carers – intervention**

*\*All questions are for stroke survivor and/or carer, except where "(C)" marks them as for carer only.*

|                                                                                                                                                                                                                                                                                                                                                                                                                                                                                                                                                                                                                                                                                                                                                                                                                                                                                                                                                                                                                                         | NPT/TDF/<br>Sekhon                                                                                                                                                |
|-----------------------------------------------------------------------------------------------------------------------------------------------------------------------------------------------------------------------------------------------------------------------------------------------------------------------------------------------------------------------------------------------------------------------------------------------------------------------------------------------------------------------------------------------------------------------------------------------------------------------------------------------------------------------------------------------------------------------------------------------------------------------------------------------------------------------------------------------------------------------------------------------------------------------------------------------------------------------------------------------------------------------------------------|-------------------------------------------------------------------------------------------------------------------------------------------------------------------|
| <b>1. You &amp; your stroke</b>                                                                                                                                                                                                                                                                                                                                                                                                                                                                                                                                                                                                                                                                                                                                                                                                                                                                                                                                                                                                         |                                                                                                                                                                   |
| - Could you tell me a bit about you? (Hobbies, interests pre and post stroke?)<br>- What were the impacts of your stroke? (symptoms, usual activities, changes over time)<br>- How long has it been since you had your stroke?<br>- How long did you spend in hospital?<br>- Could you describe your experiences of your hospital stroke care? (positives/negatives)<br>- Could you describe your experiences of the stroke care you received since coming home? (positives/negatives, waiting, still receiving, how long)<br>- Have you experienced any other difficulties alongside your stroke that required additional care?                                                                                                                                                                                                                                                                                                                                                                                                        | n/a contextual information                                                                                                                                        |
| <b>2. What are you experiences and thoughts about standing and moving more?</b>                                                                                                                                                                                                                                                                                                                                                                                                                                                                                                                                                                                                                                                                                                                                                                                                                                                                                                                                                         |                                                                                                                                                                   |
| - How much standing and moving do you do at the moment? Tell me about your daily routines? (types of activities where might be standing and moving, times of day when more likely)<br>- (C) Do you play a role in supporting standing and moving? (if yes, explore how)<br>- What do you think about trying to/encouraging stand and move more after stroke? (benefits, fears, in hospital, at home, is this valued)<br>- Do you feel confident/capable to stand and move/encourage standing and moving?<br>- At what time after stroke do you think it's most important? (throughout/inpatient/community)<br>- Have you received any support or tools for standing and moving? (e.g. groups, therapy)                                                                                                                                                                                                                                                                                                                                  | <b>Sekhon:</b><br>Affective attitude, ethicality, perceived effectiveness, self-efficacy<br><br><b>NPT:</b><br>n/a                                                |
| <b>3. What are your experiences of Get Set Go? (show examples of the intervention components)</b>                                                                                                                                                                                                                                                                                                                                                                                                                                                                                                                                                                                                                                                                                                                                                                                                                                                                                                                                       |                                                                                                                                                                   |
| - Did <b>staff talk to you</b> about/ prompting standing and moving more (in hospital or at home)? <ul style="list-style-type: none"> <li>• Who was it? Were family/friends involved?</li> <li>• How did you feel about it?</li> <li>• Did it make sense? Did you have any questions? Did they give examples of what to do/when?</li> </ul> - In hospital, did you receive an information guide or see anything about GSG on the ward? - What do you think about this? Was it appropriate for you?<br>- Did staff regularly update the recommendations about standing and moving?<br>- Did you record your standing and moving? (reasons why not if not) Will you keep recording?<br>- What did you think of the GSG materials? Were they useful? <i>[this section includes a breakdown of all intervention components not listed for publication purposes]</i><br>- How could the above materials be improved? (format, content, ease of use, social acceptability)<br>- Have you received any follow up contact since returning home? | <b>Sekhon:</b><br>Intervention coherence, Affective attitude, Perceived effectiveness, Self- efficacy, Ethicality<br><br><b>NPT:</b><br>Interactional workability |
| <b>4. Has Get Set Go helped you? (has it increased standing and moving)</b>                                                                                                                                                                                                                                                                                                                                                                                                                                                                                                                                                                                                                                                                                                                                                                                                                                                                                                                                                             |                                                                                                                                                                   |

|                                                                                                                                                                                                                                                                                                                                                                                                                                                                                                                                                                                                                                                                                                                                                                                                                                                                                                                                                                                                                                                                                                                                                                                                                                                                                              |                                                                                                                                                                         |
|----------------------------------------------------------------------------------------------------------------------------------------------------------------------------------------------------------------------------------------------------------------------------------------------------------------------------------------------------------------------------------------------------------------------------------------------------------------------------------------------------------------------------------------------------------------------------------------------------------------------------------------------------------------------------------------------------------------------------------------------------------------------------------------------------------------------------------------------------------------------------------------------------------------------------------------------------------------------------------------------------------------------------------------------------------------------------------------------------------------------------------------------------------------------------------------------------------------------------------------------------------------------------------------------|-------------------------------------------------------------------------------------------------------------------------------------------------------------------------|
| <p>1 - What did you think about GSG overall?</p> <p>2 - Which parts worked well / not so well? Is there anything you particularly like or dislike?</p> <p>3 - Did it make you want to stand and move more? Did you?</p> <p>4 • Did you benefit in any other way?</p> <p>5 • Has it helped or hindered your recovery from stroke? Or influenced your life more broadly?</p> <p>6 • Did it make you do anything differently or change anything? (e.g. Did it affect your:</p> <p>7 motivation, goals, mood, remembering to stand and move, confidence, activities, health,</p> <p>8 conversations)</p> <p>9 • Was your time spent using the guide beneficial?</p> <p>10 • Have you incorporated new activity into your daily life? Do you feel you will maintain it?</p> <p>11 - Have your family and friends used the guide and benefitted, or changed anything as a result?</p> <p>12 - Has engaging with the Get Set Go intervention been worthwhile?</p> <p>13 - Do you think Get Set Go can help other people?</p> <p>14 - Does it help recovery after stroke?</p>                                                                                                                                                                                                                        | <p><b>Sekhon:</b><br/>Burden,<br/>Self-efficacy,<br/>Opportunity<br/>costs,<br/>Affective<br/>attitudes,<br/>Perceived<br/>effectiveness</p> <p><b>NPT:</b><br/>n/a</p> |
| <p>17</p> <p>18 <b>5. What were the challenges or things that helped?</b></p>                                                                                                                                                                                                                                                                                                                                                                                                                                                                                                                                                                                                                                                                                                                                                                                                                                                                                                                                                                                                                                                                                                                                                                                                                |                                                                                                                                                                         |
| <p>19 - Did anything make it difficult to use Get Set Go / to stand and move? (fears, impact of stroke,<br/>20 motivation, unexpected events, confidence, opportunities, environment, forgetting, mood, other<br/>21 responsibilities/ lack of time, not knowing what to do, seeing the benefit, equipment)</p> <p>22 • Is there anything you struggle with/ have concerns/ uncertainties about in terms of Get Set<br/>23 Go/standing and moving?</p> <p>24 • Did you feel confident you could ask for help?</p> <p>25 • Did staff talk to you about GSG (or did it feel like something to do on your own)?</p> <p>26 - Did anything make it easier to use Get Set Go / to stand and move? (staff, family, confidence,<br/>27 opportunities, environment, motivation, mood, timing after stroke, knowing what to do, seeing<br/>28 the benefit, equipment)</p> <p>29 • Did you make any changes to your surroundings to make it easier for you to move around<br/>30 (in hospital or at home)? Was it easy or difficult to make these changes?</p> <p>31 • Is there anything else that could be better to help you use Get Set Go/stand and move<br/>32 more?</p> <p>33 - Has anything else influenced your behaviour/affected your standing and moving alongside the<br/>34 programme?</p> | <p><b>Sekhon:</b><br/>Burden,<br/>Opportunity<br/>costs,<br/>Affective<br/>attitude,<br/>Self-efficacy</p> <p><b>NPT:</b><br/>Interactional<br/>workability</p>         |
| <p>37</p> <p>38 <b>6. Could anything be better?</b></p>                                                                                                                                                                                                                                                                                                                                                                                                                                                                                                                                                                                                                                                                                                                                                                                                                                                                                                                                                                                                                                                                                                                                                                                                                                      |                                                                                                                                                                         |
| <p>39 - Is there anything else you would like to say about your experience / other feedback?</p> <p>40 - What might you do differently next time?</p>                                                                                                                                                                                                                                                                                                                                                                                                                                                                                                                                                                                                                                                                                                                                                                                                                                                                                                                                                                                                                                                                                                                                        | <p><b>Sekhon:</b><br/>Affective attitude</p> <p><b>NPT:</b><br/>n/a</p>                                                                                                 |
| <p>43</p> <p>44 <b>7. The impacts of the COVID pandemic</b></p>                                                                                                                                                                                                                                                                                                                                                                                                                                                                                                                                                                                                                                                                                                                                                                                                                                                                                                                                                                                                                                                                                                                                                                                                                              |                                                                                                                                                                         |
| <p>45 - What impact has the COVID pandemic and the associated restrictions had on your day-to-day life? (health,<br/>46 physical, social, emotional)</p> <p>47 - Could you describe any changes in your activities as a result of the COVID pandemic? (e.g. physical, social, day-<br/>48 to-day- explore if doing any activities less or more)</p> <p>49 - Has the COVID pandemic influenced your standing and moving?</p> <p>50 - Has the COVID pandemic influenced your engagement with the Get Set Go intervention?</p> <p>51 - (C) Has the COVID pandemic had an influence on how much you have been able to support/encourage standing<br/>52 and moving?</p>                                                                                                                                                                                                                                                                                                                                                                                                                                                                                                                                                                                                                          |                                                                                                                                                                         |
| <p>53</p> <p>54 <b>8. Is there anything else you would like to ask or mention?</b></p> <p>55</p> <p>56</p> <p>57</p> <p>58</p> <p>59</p> <p>60</p>                                                                                                                                                                                                                                                                                                                                                                                                                                                                                                                                                                                                                                                                                                                                                                                                                                                                                                                                                                                                                                                                                                                                           |                                                                                                                                                                         |



**4. Topic guide for stroke survivors and carers – control**

\*All questions are for stroke survivor and/or carer, except where “(C)” marks them as for carer only.

|                                                                                                                                                                                                                                                                                                                                                                                                                                                                                                                                                                                                                                                                                                                       | NPT/TDF/<br>Sekhon                                                                       |
|-----------------------------------------------------------------------------------------------------------------------------------------------------------------------------------------------------------------------------------------------------------------------------------------------------------------------------------------------------------------------------------------------------------------------------------------------------------------------------------------------------------------------------------------------------------------------------------------------------------------------------------------------------------------------------------------------------------------------|------------------------------------------------------------------------------------------|
| <b>1. About you (stroke survivor)</b>                                                                                                                                                                                                                                                                                                                                                                                                                                                                                                                                                                                                                                                                                 |                                                                                          |
| - Could you tell me a bit about you? (Hobbies, interests pre and post stroke?)                                                                                                                                                                                                                                                                                                                                                                                                                                                                                                                                                                                                                                        | n/a contextual information                                                               |
| <b>2. Your stroke (stroke survivor)</b>                                                                                                                                                                                                                                                                                                                                                                                                                                                                                                                                                                                                                                                                               |                                                                                          |
| - How long has it been since you had your stroke?<br>- What were the impacts of your stroke? (symptoms and how they may have changed over time)<br>- How long did you spend in hospital?<br>- Could you describe your experiences of the stroke care you received? (inpatient/community care/any additional support/positives/negatives)<br>- Have you experienced any other difficulties alongside your stroke that have required additional care?                                                                                                                                                                                                                                                                   | n/a contextual information                                                               |
| <b>3. Perceptions/ thoughts about standing and moving? (stroke survivor and carer)</b>                                                                                                                                                                                                                                                                                                                                                                                                                                                                                                                                                                                                                                |                                                                                          |
| - <b>(SS)</b> What do you thinking about trying to stand and move more after stroke? (benefits, fears)<br>- <b>(SS and C)</b> To what extent do you feel confident/capable to stand and move/encourage standing and moving?<br>- <b>(C)</b> What do you think about encouraging people who have had a stroke to stand and move more? (including benefits, how much this is valued)<br>- <b>(SS and C)</b> What sort of time in their care pathway do you think it is most important? (Throughout/inpatient/community).<br>- <b>(SS and C)</b> Do you feel as though you could benefit from learning more about standing and moving after stroke? (what could be helpful?)                                             | <b>Sekhon:</b><br>Affective attitude, ethicality, perceived effectiveness, self-efficacy |
| <b>3. Standing and moving more- your experiences</b>                                                                                                                                                                                                                                                                                                                                                                                                                                                                                                                                                                                                                                                                  |                                                                                          |
| - <b>(SS)</b> Could you tell me a little about your day-to-day routines?<br>- <b>(SS)</b> How much standing and moving would you tend to do each day? (discuss types of activities where might be standing and moving, or times of day when more likely)<br>- <b>(C)</b> Do you play a role in supporting standing and moving? (is yes, explore how they provide support)<br>- <b>(SS and C)</b> What do you remember about being encouraged to stand and move in hospital/by community teams?<br>- <b>(SS and C)</b> Have you received any support about standing and moving (e.g. from therapists, groups).<br>- <b>(SS and C)</b> Are you aware of any specific initiatives/ tools to support standing and moving? |                                                                                          |
| <b>4. Challenges or things that help supporting standing and moving?</b>                                                                                                                                                                                                                                                                                                                                                                                                                                                                                                                                                                                                                                              |                                                                                          |
| - <b>(SS)</b> Tell me about any challenges you may face in standing and moving? (physical, cognitive, fears of falls, confidence, opportunities, environmental factors, motivation)<br>- <b>(C)</b> Tell me about any challenges you may face in supporting standing and moving? (same prompts as above)<br>- <b>(SS and C)</b> Any other particular things that work particularly well or not so well that might affect standing and moving?                                                                                                                                                                                                                                                                         | <b>Sekhon:</b><br>Burden, opportunity costs                                              |
| <b>5. Could anything be better?</b>                                                                                                                                                                                                                                                                                                                                                                                                                                                                                                                                                                                                                                                                                   |                                                                                          |
| - <b>(SS and C)</b> Is there anything that could facilitate standing and moving more?<br>- <b>(SS)</b> Could you benefit from more support to encourage you to stand and move more?                                                                                                                                                                                                                                                                                                                                                                                                                                                                                                                                   |                                                                                          |

|    |                                                                                               |  |
|----|-----------------------------------------------------------------------------------------------|--|
| 1  |                                                                                               |  |
| 2  | <b>6. The impacts of the COVID pandemic</b>                                                   |  |
| 3  | - What impact has COVID and the associated restrictions had on your day-to-day life? (health, |  |
| 4  | physical, social, emotional)                                                                  |  |
| 5  | - Could you describe any changes in your activities as a result of the COVID pandemic? (e.g.  |  |
| 6  | physical, social, day-to-day- explore if doing any activities less or more)                   |  |
| 7  | - Has the COVID pandemic influenced your standing and moving?                                 |  |
| 8  | - (C) Has the COVID pandemic had an influence on how much you have been able to               |  |
| 9  | support/encourage standing and moving?                                                        |  |
| 10 |                                                                                               |  |
| 11 | <b>7. Is there anything else that you would like to ask or mention?</b>                       |  |
| 12 |                                                                                               |  |
| 13 |                                                                                               |  |
| 14 |                                                                                               |  |
| 15 |                                                                                               |  |
| 16 |                                                                                               |  |
| 17 |                                                                                               |  |
| 18 |                                                                                               |  |
| 19 |                                                                                               |  |
| 20 |                                                                                               |  |
| 21 |                                                                                               |  |
| 22 |                                                                                               |  |
| 23 |                                                                                               |  |
| 24 |                                                                                               |  |
| 25 |                                                                                               |  |
| 26 |                                                                                               |  |
| 27 |                                                                                               |  |
| 28 |                                                                                               |  |
| 29 |                                                                                               |  |
| 30 |                                                                                               |  |
| 31 |                                                                                               |  |
| 32 |                                                                                               |  |
| 33 |                                                                                               |  |
| 34 |                                                                                               |  |
| 35 |                                                                                               |  |
| 36 |                                                                                               |  |
| 37 |                                                                                               |  |
| 38 |                                                                                               |  |
| 39 |                                                                                               |  |
| 40 |                                                                                               |  |
| 41 |                                                                                               |  |
| 42 |                                                                                               |  |
| 43 |                                                                                               |  |
| 44 |                                                                                               |  |
| 45 |                                                                                               |  |
| 46 |                                                                                               |  |
| 47 |                                                                                               |  |
| 48 |                                                                                               |  |
| 49 |                                                                                               |  |
| 50 |                                                                                               |  |
| 51 |                                                                                               |  |
| 52 |                                                                                               |  |
| 53 |                                                                                               |  |
| 54 |                                                                                               |  |
| 55 |                                                                                               |  |
| 56 |                                                                                               |  |
| 57 |                                                                                               |  |
| 58 |                                                                                               |  |
| 59 |                                                                                               |  |
| 60 |                                                                                               |  |

For peer review only
